# Supplementary material for: Photocatalyst and additive-free visible light induced trifluoromethylation–arylation ofN-arylacrylamides with Umemoto's reagent
Source: Royal Society of Chemistry journal article supplement (doi:10.1039/d0cc07502g), 2020-12-18
Supplement: d0cc07502g1.pdf [file d0cc07502g1.pdf]

## Electronic Supplementary Information

### Photocatalyst and additive-free visible light induced trifluoromethylation - arylation of *N*-arylacrylamides with Umemoto's reagent

Lingling Chen,<sup>‡a</sup> Pengju Ma,<sup>‡a</sup> Bo Yang,<sup>a</sup> Xu Zhao,<sup>b</sup> Xuan Huang<sup>\*a</sup> and Junmin Zhang<sup>\*a</sup>

<sup>a</sup>International Joint Research Centre for Molecular Science, College of Chemistry and Environmental Engineering, Shenzhen University, Shenzhen, 518060, P. R. China

<sup>b</sup>Research Center for Eco-Environmental Sciences, Chinese Academy of Sciences, Beijing 100085, China

**Email:** huangxuan@szu.edu.cn; zhangjm@szu.edu.cn

#### Table of Contents

|                                                                          |     |
|--------------------------------------------------------------------------|-----|
| 1. General Procedures .....                                              | S2  |
| 2. Materials and Instrumentation .....                                   | S2  |
| 3. Experimental Procedures and Characterization Data for Compounds ..... | S3  |
| 4. Additional Examples and Unsuccessful Substrates .....                 | S11 |
| 5. Experimental Details for Mechanistic Studies .....                    | S12 |
| 6. Copies of NMR Spectra .....                                           | S15 |
| 7. References .....                                                      | S51 |

## 1. General Procedures

Glassware and stir bars were dried in an oven at 140 °C for at least 12 h and then cooled in a desiccator cabinet prior to use. Optimization and substrate screens were performed in 10-mL Schlenk Storage Tubes (with High Vacuum Valves, SYNTHWARE, Mfr. No. F580010). Reactions were carried out under a nitrogen atmosphere with dry solvents under anhydrous conditions, unless otherwise noted. All other reactions were performed in round-bottom flasks sealed with rubber septa. Plastic syringes or glass pipets were used to transfer liquid reagents and solvents. Reactions were stirred magnetically using Teflon-coated, magnetic stir bars. Analytical thin-layer chromatography (TLC) was performed using plates pre-coated with 0.25 mm of 230–400 mesh silica gel impregnated with a fluorescent indicator (254 nm) supplied. TLC plates were visualized by exposure to ultraviolet light and/or exposure to  $\text{KMnO}_4$  stain. Organic solutions were concentrated under reduced pressure using a rotary evaporator. Flash-column chromatography was performed on silica gel (Qingdao Haiyang Chemical Co., Ltd., 200–300 meshes) under pressure.

## 2. Materials and Instrumentation

Nuclear magnetic resonance spectra were recorded at ambient temperature (unless otherwise stated) on a Bruker Avance III 500 MHz NMR spectrometer. All values for proton chemical shifts are reported in parts per million ( $\delta$ ) and are calibrated using residual undeuterated solvent as an internal reference ( $\text{CDCl}_3$ ;  $\delta = 7.26$  ppm). All values for carbon chemical shifts are reported in parts per million ( $\delta$ ) and are calibrated against the deuterated solvent peak ( $\text{CDCl}_3$ ;  $\delta = 77.16$  ppm). All values for fluorine chemical shifts are reported in parts per million ( $\delta$ ) from  $\text{CFCl}_3$  ( $\delta 0$  ppm) as the external standard. NMR data are represented as follows: chemical shift, multiplicity (s = singlet, d = doublet, t = triplet, q = quartet, quin = quintuplet, sext = sextet, sep = septet, dd = doublet of doublets, td = triplet of doublets, dq = doublet of quartets, qq = quartet of quartets, m = multiplet, br = broad), coupling constant (Hz), and integration. High-resolution mass spectra were obtained using a liquid chromatography-electrospray ionization and Time-of-flight mass spectrometer. Reagents were purchased at the highest commercial quality and used without further purification, unless otherwise stated. Solvents for chromatography were used as supplied by Adamas-beta®. The *N*-Arylmethacrylamides were prepared according to the reported procedures.<sup>S1,2</sup> Umemoto's reagent was purchased from Bide Pharmatech Ltd. (98% HPLC).

### 3. Experimental Procedures and Characterization Data for Compounds

A flame-dried 10-mL Schlenk tube was equipped with a rubber septum and magnetic stir bar and was charged with *N*-arylacrylamide **1** (0.20 mmol, 1.0 equiv) and Umemoto's reagent **2** (0.30 mmol, 1.5 equiv). The tube was evacuated and backfilled with nitrogen for three times, and then DMF (2.0 mL) were added with a syringe under nitrogen. The mixture was then irradiated by 3 W blue LEDs with stirring. After the reaction mixture was stirred for 24 h, the mixture was poured into a separatory funnel and diluted with 20 mL of H<sub>2</sub>O and 20 mL of ethyl acetate. The layers were separated and the aqueous layer was extracted with ethyl acetate (2 × 20 mL). The combined organic layers were successively washed with NaHCO<sub>3</sub> aqueous and brine, dried over Na<sub>2</sub>SO<sub>4</sub> and concentrated under reduced pressure after filtration. The residue was purified by silica column chromatography (eluent: petroleum ether/EtOAc = 10/1 to 5/1, v/v) to give the desired product **3**.

#### Analytical data for compounds **3a-3v**:

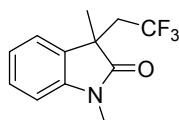

1,3-Dimethyl-3-(2,2,2-trifluoroethyl)indolin-2-one (**3a**). White solid, 39.4 mg, 81%. <sup>1</sup>H NMR (500 MHz, CDCl<sub>3</sub>): δ 7.31 (td, *J* = 7.7, 0.50 Hz, 1H), 7.26 (d, *J* = 7.0 Hz, 1H), 7.09 (t, *J* = 7.5 Hz, 1H), 6.88 (d, *J* = 7.5 Hz, 1H), 3.23 (s, 3H), 2.82 (dq, *J* = 15.0, 10.7, 1H), 2.65 (dq, *J* = 15.5, 10.5 Hz, 1H), 1.40 (s, 3H); <sup>13</sup>C NMR (126 MHz, CDCl<sub>3</sub>): δ 178.6, 143.0, 131.1, 128.6, 125.4 (q, *J* = 278.7 Hz), 123.6, 122.7, 108.6, 44.5 (q, *J* = 2.1 Hz), 40.7 (q, *J* = 28.3 Hz), 26.5, 25.1; <sup>19</sup>F NMR (470 MHz, CDCl<sub>3</sub>): δ -61.95 (t, *J* = 10.6 Hz). (Known compound; spectra data were identical to the literature.<sup>[S3a-b and S3d-i]</sup>)

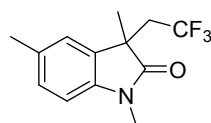

1,3,5-Trimethyl-3-(2,2,2-trifluoroethyl)indolin-2-one (**3b**). White solid, 39.7 mg, 77%. <sup>1</sup>H NMR (500 MHz, CDCl<sub>3</sub>): δ 7.11–7.07 (m, 2H), 6.76 (d, *J* = 8.0 Hz, 1H), 3.21 (s, 3H), 2.80 (dq, *J* = 15.0, 10.8 Hz, 1H), 2.62 (dq, *J* = 15.0, 10.5 Hz, 1H), 2.35 (s, 3H), 1.38 (s, 3H); <sup>13</sup>C NMR (126 MHz, CDCl<sub>3</sub>): δ 178.5, 140.6, 132.3, 131.2, 128.9, 125.4 (q, *J* = 278.7 Hz), 124.4, 108.3, 44.5 (q, *J* = 1.9 Hz), 40.7 (q, *J* = 28.3 Hz), 26.6, 25.1, 21.2; <sup>19</sup>F NMR (470 MHz, CDCl<sub>3</sub>): δ -61.90 (t, *J* = 10.6 Hz). (Known compound; spectra data were identical to the literature.<sup>[S3a-b, S3d and S3f-i]</sup>)

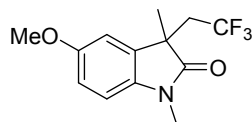

5-Methoxy-1,3-dimethyl-3-(2,2,2-trifluoroethyl)indolin-2-one (**3c**). White solid, 41.4 mg, 76%.  $^1\text{H}$  NMR (500 MHz,  $\text{CDCl}_3$ ):  $\delta$  6.87 (d,  $J = 2.5$  Hz), 6.82 (dd,  $J = 8.5, 2.5$  Hz, 1H), 6.77 (d,  $J = 8.5$  Hz, 1H), 3.79 (s, 3H), 3.20 (s, 3H), 2.80 (dq,  $J = 15.3, 10.8$  Hz, 1H), 2.61 (dq,  $J = 15.0, 10.5$  Hz, 1H), 1.38 (s, 3H);  $^{13}\text{C}$  NMR (126 MHz,  $\text{CDCl}_3$ ):  $\delta$  178.2, 156.2, 136.5, 132.5, 125.4 (q,  $J = 278.7$  Hz), 112.7, 111.3, 108.8, 55.9, 44.9 (q,  $J = 2.0$  Hz), 40.7 (q,  $J = 28.3$  Hz), 26.6, 25.1;  $^{19}\text{F}$  NMR (470 MHz,  $\text{CDCl}_3$ ):  $\delta$  -61.88 (t,  $J = 10.6$  Hz). (Known compound; spectra data were identical to the literature.<sup>[S3a-b, S3d-g and S3i]</sup>)

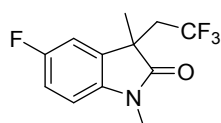

5-Fluoro-1,3-dimethyl-3-(2,2,2-trifluoroethyl)indolin-2-one (**3d**). White solid, 28.8 mg, 55%.  $^1\text{H}$  NMR (500 MHz,  $\text{CDCl}_3$ ):  $\delta$  7.03–6.99 (m, 2H), 6.80 (dd,  $J = 9.5, 4.5$  Hz, 1H), 3.22 (s, 3H), 2.82 (dq,  $J = 15.3, 10.8$  Hz, 1H), 2.62 (dq,  $J = 15.0, 10.5$  Hz, 1H), 1.40 (s, 3H);  $^{13}\text{C}$  NMR (126 MHz,  $\text{CDCl}_3$ ):  $\delta$  178.2, 159.4 (d,  $J = 241.3$  Hz), 138.9 (d,  $J = 1.9$  Hz), 132.7 (d,  $J = 8.1$  Hz), 125.2 (q,  $J = 278.6$  Hz), 115.0 (d,  $J = 23.6$  Hz), 111.9 (dd,  $J = 25.1, 1.4$  Hz), 109.1 (d,  $J = 8.2$  Hz), 44.9 (quin,  $J = 1.9$  Hz), 40.7 (q,  $J = 28.5$  Hz), 26.7, 25.0;  $^{19}\text{F}$  NMR (470 MHz,  $\text{CDCl}_3$ ):  $\delta$  -61.98 (t,  $J = 10.3$  Hz), -120.39 (sext,  $J = 4.2$  Hz). (Known compound; spectra data were identical to the literature.<sup>[3a-b, S3d and S3f-i]</sup>)

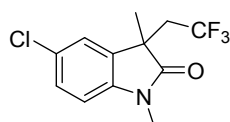

5-Chloro-1,3-dimethyl-3-(2,2,2-trifluoroethyl)indolin-2-one (**3e**). White solid, 34.0 mg, 61%.  $^1\text{H}$  NMR (500 MHz,  $\text{CDCl}_3$ ):  $\delta$  7.29 (dd,  $J = 8.0, 2.0$  Hz, 1H), 7.24 (d,  $J = 1.5$  Hz, 1H), 6.80 (d,  $J = 8.0$  Hz, 1H), 3.22 (s, 3H), 2.82 (dq,  $J = 15.3, 10.5$  Hz, 1H), 2.62 (dq,  $J = 15.3, 10.5$  Hz, 1H), 1.40 (s, 3H);  $^{13}\text{C}$  NMR (126 MHz,  $\text{CDCl}_3$ ):  $\delta$  178.0, 141.6, 132.8, 128.6, 128.2, 125.2 (q,  $J = 278.6$  Hz), 124.2, 109.5, 44.7 (q,  $J = 2.0$  Hz), 40.7 (q,  $J = 28.5$  Hz), 26.7, 25.0;  $^{19}\text{F}$  NMR (470 MHz,  $\text{CDCl}_3$ ):  $\delta$  -61.97 (t,  $J = 10.6$  Hz). (Known compound; spectra data were identical to the literature.<sup>[S3a-b, S3d and S3f-i]</sup>)

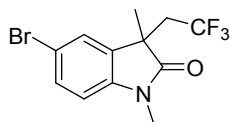

5-Bromo-1,3-dimethyl-3-(2,2,2-trifluoroethyl)indolin-2-one (**3f**). White solid, 44.6 mg, 69%. <sup>1</sup>H NMR (500 MHz, CDCl<sub>3</sub>): δ 7.43 (dd, *J* = 8.0, 2.0 Hz, 1H), 7.37 (d, *J* = 2.0 Hz, 1H), 6.75 (d, *J* = 8.5 Hz, 1H), 3.20 (s, 3H), 2.81 (dq, *J* = 15.5, 10.7 Hz, 1H), 2.62 (dq, *J* = 15.3, 10.5 Hz, 1H), 1.39 (s, 3H); <sup>13</sup>C NMR (126 MHz, CDCl<sub>3</sub>): δ 177.9, 142.1, 133.2, 131.5, 126.9, 125.2 (q, *J* = 278.7 Hz), 115.4, 110.0, 44.6 (q, *J* = 2.0 Hz), 40.7 (q, *J* = 28.5 Hz), 26.6, 25.0; <sup>19</sup>F NMR (470 MHz, CDCl<sub>3</sub>): δ -61.95 (t, *J* = 10.6 Hz). (Known compound; spectra data were identical to the literature.<sup>[S3a-b and S3d-i]</sup>)

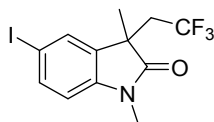

5-Iodo-1,3-dimethyl-3-(2,2,2-trifluoroethyl)indolin-2-one (**3g**). White solid, 56.2 mg, 76%. <sup>1</sup>H NMR (500 MHz, CDCl<sub>3</sub>): δ 7.61 (dd, *J* = 8.0, 1.5 Hz, 1H), 7.53 (d, *J* = 1.0 Hz, 1H), 6.65 (d, *J* = 8.0 Hz, 1H), 3.19 (s, 3H), 2.80 (dq, *J* = 15.0, 10.7 Hz, 1H), 2.61 (dq, *J* = 15.0, 10.5 Hz, 1H), 1.38 (s, 3H); <sup>13</sup>C NMR (126 MHz, CDCl<sub>3</sub>): δ 177.7, 142.7, 137.5, 133.5, 132.5, 125.1 (q, *J* = 278.8 Hz), 110.6, 85.2, 44.4, 40.7 (q, *J* = 28.5 Hz), 26.6, 25.0; <sup>19</sup>F NMR (470 MHz, CDCl<sub>3</sub>): δ -61.94 (t, *J* = 10.3 Hz). (Known compound; spectra data were identical to the literature.<sup>[S3a-b, S3d, S3g and S3i]</sup>)

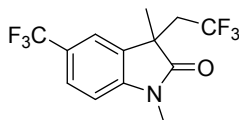

1,3-Dimethyl-3-(2,2,2-trifluoroethyl)-5-(trifluoromethyl)indolin-2-one (**3h**). White solid, 41.1 mg, 66%. <sup>1</sup>H NMR (500 MHz, CDCl<sub>3</sub>): δ 7.60 (dd, *J* = 8.0, 1.0 Hz, 1H), 7.49 (s, 1H), 6.96 (d, *J* = 8.0 Hz, 1H), 3.27 (s, 3H), 2.86 (dq, *J* = 15.8, 10.8 Hz, 1H), 2.68 (dq, *J* = 15.5, 10.3 Hz, 1H), 1.44 (s, 3H); <sup>13</sup>C NMR (126 MHz, CDCl<sub>3</sub>): δ 178.5, 146.0, 131.7, 126.5 (q, *J* = 4.0 Hz), 125.15 (q, *J* = 32.9 Hz), 125.13 (q, *J* = 278.6 Hz), 124.4 (q, *J* = 271.9 Hz), 120.8 (q, *J* = 2.0 Hz), 108.4, 44.5 (q, *J* = 2.1 Hz), 40.7 (q, *J* = 28.6 Hz), 26.8, 25.0; <sup>19</sup>F NMR (470 MHz, CDCl<sub>3</sub>): δ -61.54 (s), -62.08 (t, *J* = 10.3 Hz). (Known compound; spectra data were identical to the literature.<sup>[S3e-f and S3h-i]</sup>)

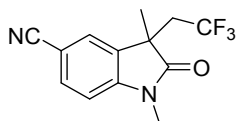

1,3-Dimethyl-2-oxo-3-(2,2,2-trifluoroethyl)indoline-5-carbonitrile (**3i**). White solid, 34.2 mg, 64%. <sup>1</sup>H NMR (500 MHz, CDCl<sub>3</sub>): δ 7.65 (dd, *J* = 8.0, 1.5 Hz, 1H), 7.51 (d, *J* = 1.0 Hz, 1H), 6.96

(d,  $J = 8.5$  Hz, 1H), 3.26 (s, 3H), 2.86 (dq,  $J = 15.5, 10.5$  Hz, 1H), 2.67 (dq,  $J = 15.3, 10.3$  Hz, 1H), 1.42 (s, 3H);  $^{13}\text{C}$  NMR (126 MHz,  $\text{CDCl}_3$ ):  $\delta$  178.2, 146.8, 134.0, 132.1, 127.1, 125.0 (q,  $J = 278.6$  Hz), 119.1, 109.1, 106.1, 44.3 (q,  $J = 2.1$  Hz), 40.6 (q,  $J = 28.6$  Hz), 26.8, 24.9;  $^{19}\text{F}$  NMR (470 MHz,  $\text{CDCl}_3$ ):  $\delta$  -62.03 (t,  $J = 10.3$  Hz). (Known compound; spectra data were identical to the literature.<sup>[S3b and S3d-ij)</sup>

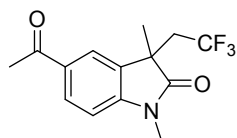

5-Acetyl-1,3-dimethyl-3-(2,2,2-trifluoroethyl)indolin-2-one (**3j**). White solid, 41.3 mg, 72%.  $^1\text{H}$  NMR (500 MHz,  $\text{CDCl}_3$ ):  $\delta$  7.96 (dd,  $J = 8.3, 1.8$  Hz, 1H), 7.89 (d,  $J = 1.0$  Hz, 1H), 6.92 (d,  $J = 8.0, 1\text{H}$ ), 3.26 (s, 3H), 2.85 (dq,  $J = 15.0, 10.5$  Hz, 1H), 2.69 (dq,  $J = 15.0, 10.3$  Hz, 1H), 2.58 (s, 3H), 1.42 (s, 3H);  $^{13}\text{C}$  NMR (126 MHz,  $\text{CDCl}_3$ ):  $\delta$  196.8, 178.8, 147.3, 132.4, 131.4, 130.7, 125.1 (q,  $J = 278.7$  Hz), 123.5, 108.0, 44.3 (q,  $J = 2.0$  Hz), 40.7 (q,  $J = 28.4$  Hz), 26.8, 26.5, 25.1;  $^{19}\text{F}$  NMR (470 MHz,  $\text{CDCl}_3$ ):  $\delta$  -62.08 (t,  $J = 10.3$  Hz). (Known compound; spectra data were identical to the literature.<sup>[S3f-g]</sup>)

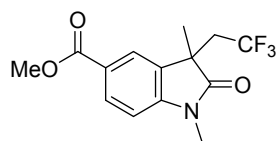

Methyl 1,3-dimethyl-2-oxo-3-(2,2,2-trifluoroethyl)indoline-5-carboxylate (**3k**). White solid, 40.8 mg, 68%.  $^1\text{H}$  NMR (500 MHz,  $\text{CDCl}_3$ ):  $\delta$  8.05 (dd,  $J = 8.3, 1.8$  Hz, 1H), 7.92 (d,  $J = 1.0$  Hz, 1H), 6.91 (d,  $J = 8.5$  Hz, 1H), 3.89 (s, 3H), 3.25 (s, 3H), 2.85 (dq,  $J = 15.3, 10.8$  Hz, 1H), 2.68 (dq,  $J = 15.5, 10.5$  Hz, 1H), 1.41 (s, 3H);  $^{13}\text{C}$  NMR (126 MHz,  $\text{CDCl}_3$ ):  $\delta$  178.8, 166.8, 147.1, 131.3, 131.1, 125.1 (q,  $J = 278.7$  Hz), 124.9, 124.8, 108.2, 52.2, 44.3 (q,  $J = 2.1$  Hz), 40.7 (q,  $J = 28.4$  Hz), 26.7, 25.1;  $^{19}\text{F}$  NMR (470 MHz,  $\text{CDCl}_3$ ):  $\delta$  -62.11 (t,  $J = 10.6$  Hz). (Known compound; spectra data were identical to the literature.<sup>[S3e and S3h]</sup>)

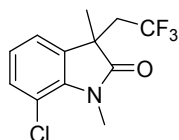

7-Chloro-1,3-dimethyl-3-(2,2,2-trifluoroethyl)indolin-2-one (**3l**). White solid, 28.9 mg, 52%.  $^1\text{H}$  NMR (500 MHz,  $\text{CDCl}_3$ ):  $\delta$  7.23 (dd,  $J = 8.0, 1.0$  Hz, 1H), 7.13 (d,  $J = 7.5$  Hz, 1H), 6.99 (t,  $J = 8.0$  Hz, 1H), 3.60 (s, 3H), 2.85 (dq,  $J = 15.0, 10.7$  Hz, 1H), 2.62 (dq,  $J = 15.5, 10.3$  Hz, 1H), 1.39

(s, 3 H);  $^{13}\text{C}$  NMR (126 MHz,  $\text{CDCl}_3$ ):  $\delta$  178.8, 139.0, 133.8, 131.0, 125.1 (q,  $J = 278.6$  Hz), 123.5, 122.1, 116.0, 44.3 (q,  $J = 2.1$  Hz), 41.0 (q,  $J = 28.4$  Hz), 30.0, 25.6;  $^{19}\text{F}$  NMR (470 MHz,  $\text{CDCl}_3$ ):  $\delta$  -61.97 (t,  $J = 10.6$  Hz). (Known compound; spectra data were identical to the literature.<sup>[S3d and S3i]</sup>)

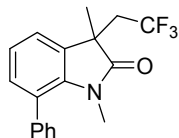

1,3-Dimethyl-7-phenyl-3-(2,2,2-trifluoroethyl)indolin-2-one (**3m**). White solid, 37.1 mg, 58%.  $^1\text{H}$  NMR (500 MHz,  $\text{CDCl}_3$ ):  $\delta$  7.43–7.40 (m, 3H), 7.38–7.34 (m, 2H), 7.26 (dd,  $J = 7.5, 0.50$  Hz, 1H), 7.14 (dd,  $J = 8.0, 1.5$  Hz, 1H), 7.09 (t,  $J = 7.5$  Hz, 1H), 2.87 (dq,  $J = 15.0, 10.7$  Hz, 1H), 2.75 (s, 3H), 2.68 (dq,  $J = 15.3, 10.5$  Hz, 1H), 1.46 (s, 3H);  $^{13}\text{C}$  NMR (126 MHz,  $\text{CDCl}_3$ ):  $\delta$  179.6, 139.9, 138.9, 132.1, 131.6, 130.1, 129.9, 128.0, 127.8, 126.0, 125.4 (q,  $J = 278.8$  Hz), 122.6, 122.0, 43.8 (q,  $J = 2.0$  Hz), 41.1 (q,  $J = 28.2$  Hz), 30.6, 25.5;  $^{19}\text{F}$  NMR (470 MHz,  $\text{CDCl}_3$ ):  $\delta$  -61.84 (t,  $J = 10.6$  Hz). (Known compound; spectra data were identical to the literature.<sup>[S3a and S3d]</sup>)

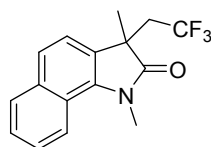

1,3-Dimethyl-3-(2,2,2-trifluoroethyl)-1,3-dihydro-2H-benzo[g]indol-2-one (**3n**). White solid, 27.6 mg, 47%.  $^1\text{H}$  NMR (500 MHz,  $\text{CDCl}_3$ ):  $\delta$  7.76 (dd,  $J = 8.0, 0.5$  Hz, 1H), 7.56–7.53 (m, 2H), 7.46–7.42 (m, 2H), 6.98 (d,  $J = 7.5$  Hz, 1H), 3.56 (s, 3H), 3.48 (dq,  $J = 15.0, 10.5$  Hz, 1H), 2.77 (dq,  $J = 15.0, 10.0$  Hz, 1H), 1.73 (s, 3H);  $^{13}\text{C}$  NMR (126 MHz,  $\text{CDCl}_3$ ):  $\delta$  171.5, 136.3, 135.0, 133.6, 126.9, 126.8, 126.6, 125.7 (q,  $J = 279.4$  Hz), 123.5, 123.0, 119.1, 108.9, 45.5 (q,  $J = 26.9$  Hz), 43.9 (q,  $J = 2.2$  Hz), 33.3, 30.0;  $^{19}\text{F}$  NMR (470 MHz,  $\text{CDCl}_3$ ):  $\delta$  -60.92 (t,  $J = 10.1$  Hz). (Known compound; spectra data were identical to the literature.<sup>[S3c and S3i]</sup>)

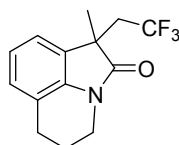

1-Methyl-1-(2,2,2-trifluoroethyl)-5,6-dihydro-4H-pyrrolo[3,2,1-ij]quinolin-2(1H)-one (**3o**). White solid, 40.8 mg, 76%.  $^1\text{H}$  NMR (500 MHz,  $\text{CDCl}_3$ ):  $\delta$  7.10 (d,  $J = 7.5$  Hz, 1H), 7.05 (dd,  $J = 7.8, 0.80$  Hz, 1H), 6.97 (t,  $J = 7.5$  Hz, 1H), 3.72 (t,  $J = 7.0$  Hz, 2H), 2.84–2.72 (m, 3H), 2.64 (dq,  $J = 15.3, 10.7$  Hz, 1H), 2.04–1.98 (m, 2H), 1.41 (s, 3H);  $^{13}\text{C}$  NMR (126 MHz,  $\text{CDCl}_3$ ):  $\delta$  177.5, 138.7, 129.8, 127.4, 125.5 (q,  $J = 278.7$  Hz), 122.2, 121.6, 120.6, 45.8 (q,  $J = 2.1$  Hz), 40.6 (q,  $J = 28.3$

Hz), 39.2, 24.72, 24.66, 21.2;  $^{19}\text{F}$  NMR (470 MHz,  $\text{CDCl}_3$ ):  $\delta$  -61.82 (t,  $J$  = 10.8 Hz). (Known compound; spectra data were identical to the literature.<sup>[S3a-b, S3d and S3f-i]</sup>)

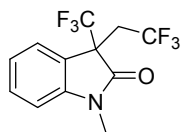

1-Methyl-3-(2,2,2-trifluoroethyl)-3-(trifluoromethyl)indolin-2-one (**3p**). White solid, 31.5 mg, 53%.  $^1\text{H}$  NMR (500 MHz,  $\text{CDCl}_3$ ):  $\delta$  7.44 (td,  $J$  = 7.8, 0.83 Hz, 1H), 7.41 (d,  $J$  = 7.5 Hz, 1H), 7.16 (t,  $J$  = 7.8 Hz, 1H), 6.93 (d,  $J$  = 8.0 Hz, 1H), 3.27 (s, 3H), 3.26 (dq,  $J$  = 15.0, 10.2 Hz, 1H), 3.00 (dq,  $J$  = 15.0, 9.7 Hz, 1H);  $^{13}\text{C}$  NMR (126 MHz,  $\text{CDCl}_3$ ):  $\delta$  169.8 (q,  $J$  = 1.7 Hz), 144.5, 131.0, 126.1, 124.5 (q,  $J$  = 278.0 Hz), 124.0 (q,  $J$  = 283.5 Hz), 123.3, 121.1, 52.7 (qq,  $J$  = 27.7, 2.3 Hz), 35.0 (qq,  $J$  = 30.1, 2.3 Hz), 27.0;  $^{19}\text{F}$  NMR (470 MHz,  $\text{CDCl}_3$ ):  $\delta$  -61.44 (t,  $J$  = 9.9 Hz), -73.80 (s); HRMS (ESI-TOF)  $m/z$   $[\text{M} + \text{H}]^+$  calcd for  $\text{C}_{12}\text{H}_{10}\text{F}_6\text{NO}$  298.0661, found 298.0658.

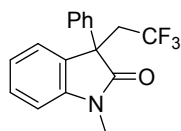

1-Methyl-3-phenyl-3-(2,2,2-trifluoroethyl)indolin-2-one (**3q**). White solid, 44.6 mg, 73%.  $^1\text{H}$  NMR (500 MHz,  $\text{CDCl}_3$ ):  $\delta$  7.40 (td,  $J$  = 7.8, 1.0 Hz, 1H), 7.35–7.26 (m, 6H), 7.17 (td,  $J$  = 7.8, 0.5 Hz, 1H), 6.94 (d,  $J$  = 8.0 Hz, 1H), 3.43 (dq,  $J$  = 15.0, 10.5 Hz, 1H), 3.23 (s, 3H), 3.05 (dq,  $J$  = 15.0, 10.0 Hz, 1H);  $^{13}\text{C}$  NMR (151 MHz,  $\text{CDCl}_3$ ):  $\delta$  176.8, 143.9, 138.8, 129.2, 129.0, 128.9, 128.1, 126.6, 126.2, 125.2 (q,  $J$  = 278.7 Hz), 122.7, 108.9, 52.1 (q,  $J$  = 1.8 Hz), 41.0 (q,  $J$  = 28.1 Hz), 26.8;  $^{19}\text{F}$  NMR (470 MHz,  $\text{CDCl}_3$ ):  $\delta$  -61.15 (t,  $J$  = 10.3 Hz). (Known compound; spectra data were identical to the literature.<sup>[S3a-b, S3e-f and S3h]</sup>)

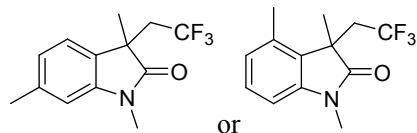

1,3,6(or 4)-Trimethyl-3-(2,2,2-trifluoroethyl)indolin-2-one (**3r+3r'**). White solid, 36.6 mg, 71%.  $^1\text{H}$  NMR (500 MHz,  $\text{CDCl}_3$ ):  $\delta$  7.21 (t,  $J$  = 7.8 Hz, 1H), 7.13 (d,  $J$  = 7.5 Hz, 0.57H), 6.90 (d,  $J$  = 7.5 Hz, 0.57H), 6.85 (d,  $J$  = 8.0 Hz, 1H), 6.73–6.71 (m, 1.57H), 3.22 (s, 3H), 3.21 (s, 1.71H), 2.96 (dq,  $J$  = 15.0, 10.8 Hz, 1H), 2.88–2.74 (m, 1.57H), 2.62 (dq,  $J$  = 15.0, 10.5 Hz, 0.57H), 2.39 (s, 1.71H), 2.38 (s, 3H), 1.45 (s, 3H), 1.38 (s, 1.71H);  $^{13}\text{C}$  NMR (126 MHz,  $\text{CDCl}_3$ ):  $\delta$  179.0, 178.7, 143.3, 143.0, 138.8, 134.9, 128.5, 128.2, 128.0, 125.43 (q,  $J$  = 278.6 Hz), 125.29, 125.19 (q,  $J$  =



278.3 Hz), 123.4, 123.3, 109.5, 106.3, 45.0 (q,  $J = 2.1$  Hz), 44.3 (q,  $J = 2.1$  Hz), 40.8 (q,  $J = 28.0$  Hz), 39.8 (q,  $J = 28.1$  Hz), 26.6, 26.5, 25.2, 23.2, 21.9, 18.4;  $^{19}\text{F}$  NMR (470 MHz,  $\text{CDCl}_3$ ):  $\delta$  -61.91 (t,  $J = 10.6$  Hz), -63.95 (t,  $J = 10.3$  Hz). (Known compound; spectra data were identical to the literature.<sup>[S3i]</sup>)

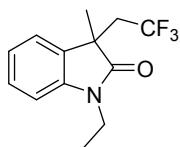

1-Ethyl-3-methyl-3-(2,2,2-trifluoroethyl)indolin-2-one (**3s**). White solid, 40.1 mg, 78%.  $^1\text{H}$  NMR (500 MHz,  $\text{CDCl}_3$ ):  $\delta$  7.29 (td,  $J = 7.8, 1.0$  Hz, 1H), 7.26 (d,  $J = 7.5$  Hz, 1H), 7.07 (td,  $J = 7.5, 0.50$  Hz, 1H), 6.89 (d,  $J = 7.5$  Hz, 1H), 3.87 (dq,  $J = 14.5, 7.0$  Hz, 1H), 3.68 (dq,  $J = 14.0, 7.0$  Hz, 1H), 2.84 (dq,  $J = 15.0, 10.7$  Hz, 1H), 2.63 (dq,  $J = 15.0, 10.5$  Hz, 1H), 1.39 (s, 3H), 1.24 (t,  $J = 7.0$  Hz, 3H);  $^{13}\text{C}$  NMR (126 MHz,  $\text{CDCl}_3$ ):  $\delta$  178.2, 142.0, 131.3, 128.6, 125.4 (q,  $J = 278.7$  Hz), 123.8, 122.5, 108.7, 44.4 (q,  $J = 2.1$  Hz), 40.8 (q,  $J = 28.3$  Hz), 34.9, 25.2, 12.4;  $^{19}\text{F}$  NMR (470 MHz,  $\text{CDCl}_3$ ):  $\delta$  -61.92 (t,  $J = 10.6$  Hz). (Known compound; spectra data were identical to the literature.<sup>[S3c-d and S3g-i]</sup>)

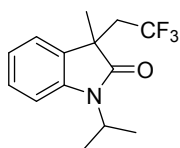

1-Isopropyl-3-methyl-3-(2,2,2-trifluoroethyl)indolin-2-one (**3t**). White solid, 40.8 mg, 75%.  $^1\text{H}$  NMR (500 MHz,  $\text{CDCl}_3$ ):  $\delta$  7.29–7.24 (m, 2H), 7.07–7.03 (m, 2H), 4.62 (sep,  $J = 7.0$  Hz, 1H), 2.84 (dq,  $J = 15.3, 10.8$  Hz, 1H), 2.61 (dq,  $J = 15.0, 10.3$  Hz, 1H), 1.47 (t,  $J = 6.5$  Hz, 6H), 1.38 (s, 3H);  $^{13}\text{C}$  NMR (126 MHz,  $\text{CDCl}_3$ ):  $\delta$  178.3, 141.7, 131.5, 128.3, 125.4 (q,  $J = 278.8$  Hz), 123.9, 122.1, 110.3, 44.2 (q,  $J = 2.0$  Hz), 44.1, 40.9 (q,  $J = 28.2$  Hz), 25.5, 19.3, 19.2;  $^{19}\text{F}$  NMR (470 MHz,  $\text{CDCl}_3$ ):  $\delta$  -61.97 (t,  $J = 10.6$  Hz). (Known compound; spectra data were identical to the literature.<sup>[S3c-d]</sup>)

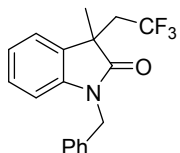

1-Benzyl-3-methyl-3-(2,2,2-trifluoroethyl)indolin-2-one (**3u**). White solid, 48.1 mg, 75%.  $^1\text{H}$  NMR (500 MHz,  $\text{CDCl}_3$ ):  $\delta$  7.34–7.25 (m, 6H), 7.19 (td,  $J = 7.8, 1.0$  Hz, 1H), 7.06 (td,  $J = 7.5, 0.50$  Hz, 1H), 6.77 (d,  $J = 7.5$  Hz, 1H), 4.99 (d,  $J = 16.0$  Hz, 1H), 4.90 (d,  $J = 15.5$  Hz, 1H), 2.92 (dq,  $J$

= 15.0, 10.7 Hz, 1H), 2.71 (dq,  $J = 15.0, 10.5$  Hz, 1H), 1.47 (s, 3H);  $^{13}\text{C}$  NMR (126 MHz,  $\text{CDCl}_3$ ):  $\delta$  178.7, 142.1, 135.8, 131.1, 128.9, 128.5, 127.8, 127.3, 125.4 (q,  $J = 278.6$  Hz), 123.7, 122.8, 109.7, 44.6 (q,  $J = 2.0$  Hz), 44.1, 40.6 (q,  $J = 28.4$  Hz), 25.8;  $^{19}\text{F}$  NMR (470 MHz,  $\text{CDCl}_3$ ):  $\delta$  -61.68 (t,  $J = 10.6$  Hz). (Known compound; spectra data were identical to the literature.<sup>[S3c-e, S3g and S3i]</sup>)

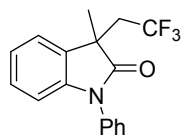

3-Methyl-1-phenyl-3-(2,2,2-trifluoroethyl)indolin-2-one (**3v**). White solid, 38.6 mg, 63%.  $^1\text{H}$  NMR (500 MHz,  $\text{CDCl}_3$ ):  $\delta$  7.55–7.51 (m, 2H), 7.44–7.38 (m, 3H), 7.33 (d,  $J = 7.5$  Hz, 1H), 7.24 (td,  $J = 7.8, 1.5$  Hz, 1H), 7.13 (td,  $J = 7.5, 1.0$  Hz, 1H), 6.84 (d,  $J = 7.5$  Hz, 1H), 2.97 (dq,  $J = 15.0, 10.7$  Hz, 1H), 2.73 (dq,  $J = 15.0, 10.3$  Hz, 1H), 1.54 (s, 3H);  $^{13}\text{C}$  NMR (126 MHz,  $\text{CDCl}_3$ ):  $\delta$  178.1, 143.1, 134.4, 130.8, 129.8, 128.6, 128.4, 126.7, 125.4 (q,  $J = 278.7$  Hz), 123.9, 123.2, 109.9, 44.6 (q,  $J = 2.0$  Hz), 41.2 (q,  $J = 28.2$  Hz), 25.6;  $^{19}\text{F}$  NMR (470 MHz,  $\text{CDCl}_3$ ):  $\delta$  -61.85 (t,  $J = 10.6$  Hz). (Known compound; spectra data were identical to the literature.<sup>[S3a-b and S3d-i]</sup>)

#### 4. Additional Examples and Unsuccessful Substrates

##### (1) Reaction of *N*-arylcinnamamide with Umemoto's reagent

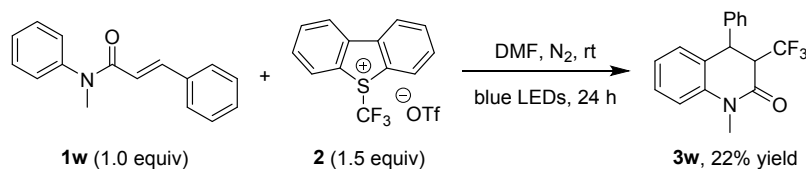

1-Methyl-4-phenyl-3-(trifluoromethyl)-3,4-dihydroquinolin-2(1*H*)-one (**3w**). Colorless oil, 13.4 mg, 22%.  $^1\text{H}$  NMR (500 MHz,  $\text{CDCl}_3$ ):  $\delta$  7.38–7.35 (m, 1H), 7.29–7.27 (m, 2H), 7.24–7.21 (m, 2H), 7.13–7.10 (m, 2H), 7.01–7.00 (m, 2H), 4.50 (s, 1H), 3.66 (qd,  $J = 9.3, 1.3$  Hz, 1H), 3.46 (s, 3H);  $^{13}\text{C}$  NMR (126 MHz,  $\text{CDCl}_3$ ):  $\delta$  161.6, 140.2, 139.3, 129.33, 129.29, 128.8, 127.8, 127.1, 124.7, 124.6 (q,  $J = 283.4$  Hz), 124.3, 115.4, 53.6 (q,  $J = 26.5$  Hz), 42.1, 30.4;  $^{19}\text{F}$  NMR (470 MHz,

CDCl<sub>3</sub>):  $\delta$  -67.27 (d,  $J$  = 8.9 Hz). (Known compound; spectra data were identical to the literature.<sup>[4]</sup>)

(2) Reaction of *N*-methacryloyl-*N*-methylarylamide with Umemoto's reagent

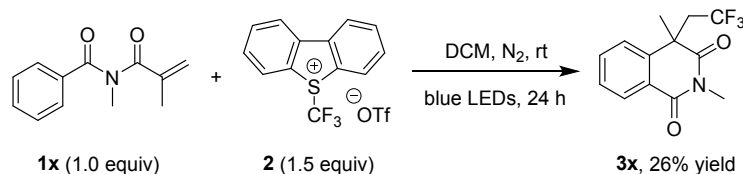

2,4-Dimethyl-4-(2,2,2-trifluoroethyl)isoquinoline-1,3(2*H*,4*H*)-dione (**3x**). Colorless oil, 14.0 mg, 26%. <sup>1</sup>H NMR (500 MHz, CDCl<sub>3</sub>):  $\delta$  8.27 (dd,  $J$  = 8.0, 1.0 Hz, 1H), 7.65 (td,  $J$  = 7.8, 1.3 Hz, 1H), 7.47 (td,  $J$  = 7.8, 0.83 Hz, 1H), 7.42 (d,  $J$  = 8.0 Hz, 1H), 3.39 (s, 3H), 3.34 (dq,  $J$  = 15.3, 10.5 Hz, 1H), 2.80 (dq,  $J$  = 15.3, 9.8 Hz, 1H), 1.65 (s, 3H); <sup>13</sup>C NMR (126 MHz, CDCl<sub>3</sub>):  $\delta$  174.7, 163.8, 140.5, 133.9, 129.4, 128.2, 125.8, 125.1 (q,  $J$  = 279.2 Hz), 124.3, 44.5 (q,  $J$  = 27.6 Hz), 43.7 (q,  $J$  = 2.1 Hz), 31.3, 27.5; <sup>19</sup>F NMR (470 MHz, CDCl<sub>3</sub>):  $\delta$  -61.66 (t,  $J$  = 9.9 Hz). (Known compound; spectra data were identical to the literature.<sup>[5]</sup>)

(3) Unsuccessful substrates

For the following acrylamides, lack of a substituent at the  $\alpha$ -position of the acrylamide or lack of substitution on the amide, or replacement of the methyl by either an acetyl or *N*-tert-butyloxycarbonyl substituent, shut down the cyclization process completely and gave a complex mixture.

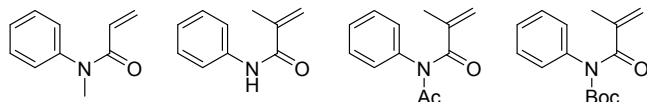

## 4. Experimental Details for Mechanistic Studies

### 4-1 The TEMPO trapping experiments

(1)

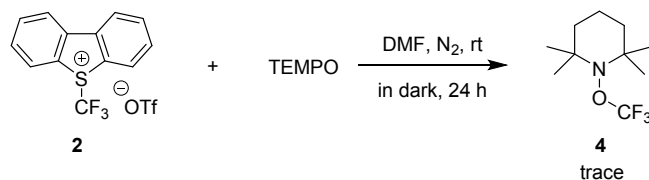

A 10.0 mL Schlenk tube was equipped with a rubber septum and magnetic stir bar and was charged with Umemoto's reagent **2** (40.2 mg, 0.10 mmol, 1.0 equiv) and TEMPO (15.6 mg, 0.10 mmol, 1.0 equiv). The tube was evacuated and backfilled with nitrogen for three times, and then DMF (1.0 mL) were added with a syringe under nitrogen. The mixture was stirred under dark for

24 hours and then determined by  $^{19}\text{F}$  NMR spectroscopy using (trifluoromethyl)benzene (3.4 mg, 0.023 mmol) as an internal standard.

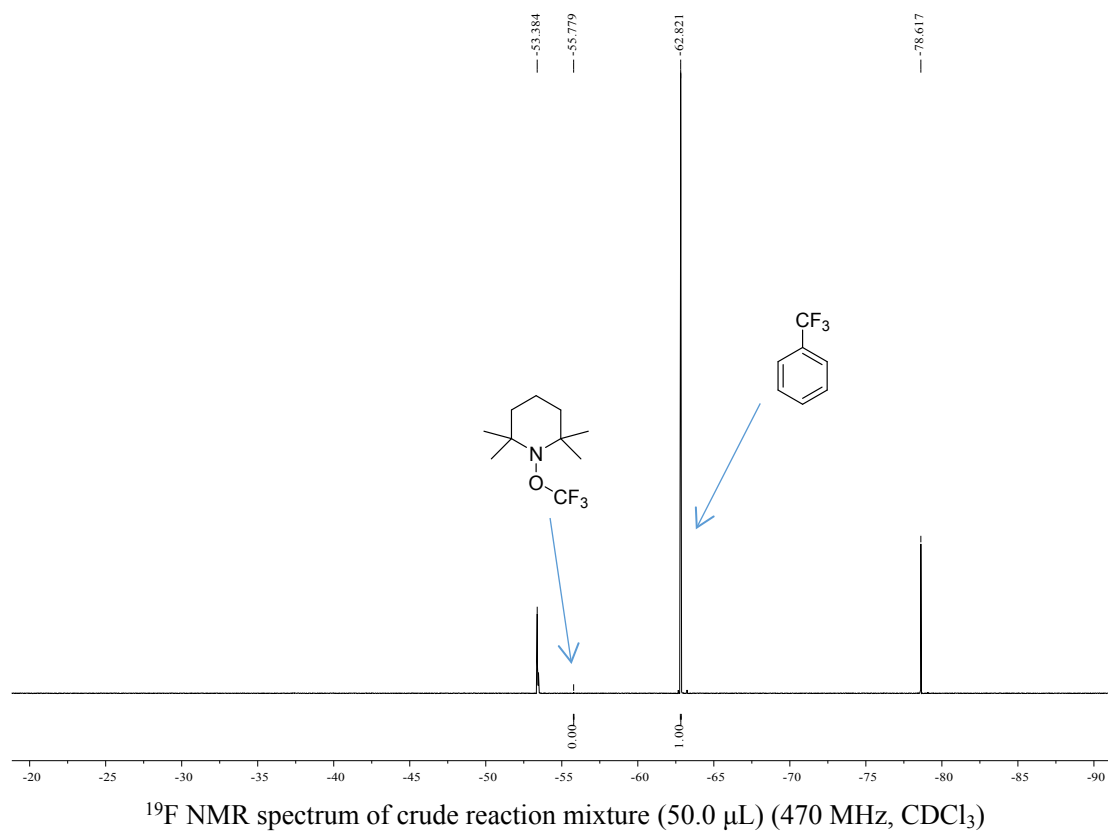

(2)

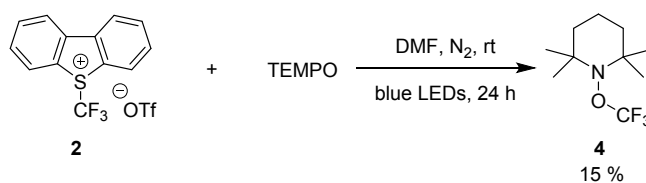

A 10.0 mL Schlenk tube was equipped with a rubber septum and magnetic stir bar and was charged with Umemoto's reagent **2** (40.2 mg, 0.10 mmol, 1.0 equiv) and TEMPO (15.6 mg, 0.10 mmol, 1.0 equiv). The tube was evacuated and backfilled with nitrogen for three times, and then DMF (1.0 mL) were added with a syringe under nitrogen. The mixture was irradiated by 3 W blue LEDs with stirring for 24 hours and then determined by  $^{19}\text{F}$  NMR spectroscopy using (trifluoromethyl)benzene (3.6 mg, 0.025 mmol) as an internal standard.

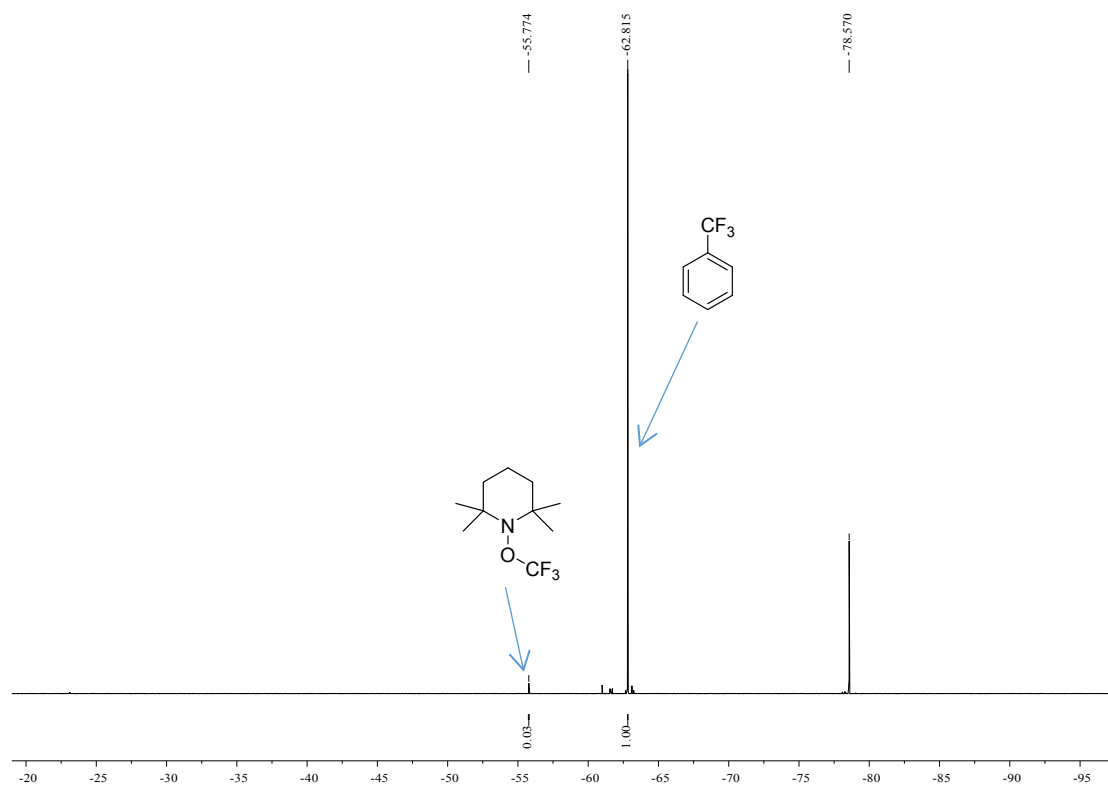

$^{19}\text{F}$  NMR spectrum of crude reaction mixture (50.0  $\mu\text{L}$ ) (470 MHz,  $\text{CDCl}_3$ )

(3)

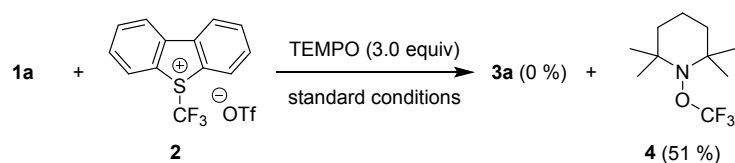

A 10.0 mL Schlenk tube was equipped with a rubber septum and magnetic stir bar and was charged with *N*-phenyl-*N*-methylacrylamide **1a** (17.5 mg, 0.10 mmol, 1.0 equiv), Umemoto's reagent **2** (60.3 mg, 0.15 mmol, 1.5 equiv), and TEMPO (46.9 mg, 0.30 mmol, 3.0 equiv). The tube was evacuated and backfilled with nitrogen for three times, and then DMF (1.0 mL) were added with a syringe under nitrogen. The mixture was irradiated by 3 W blue LEDs with stirring for 24 hours and then determined by  $^{19}\text{F}$  NMR spectroscopy using (trifluoromethyl)benzene (3.4 mg, 0.023 mmol) as an internal standard.

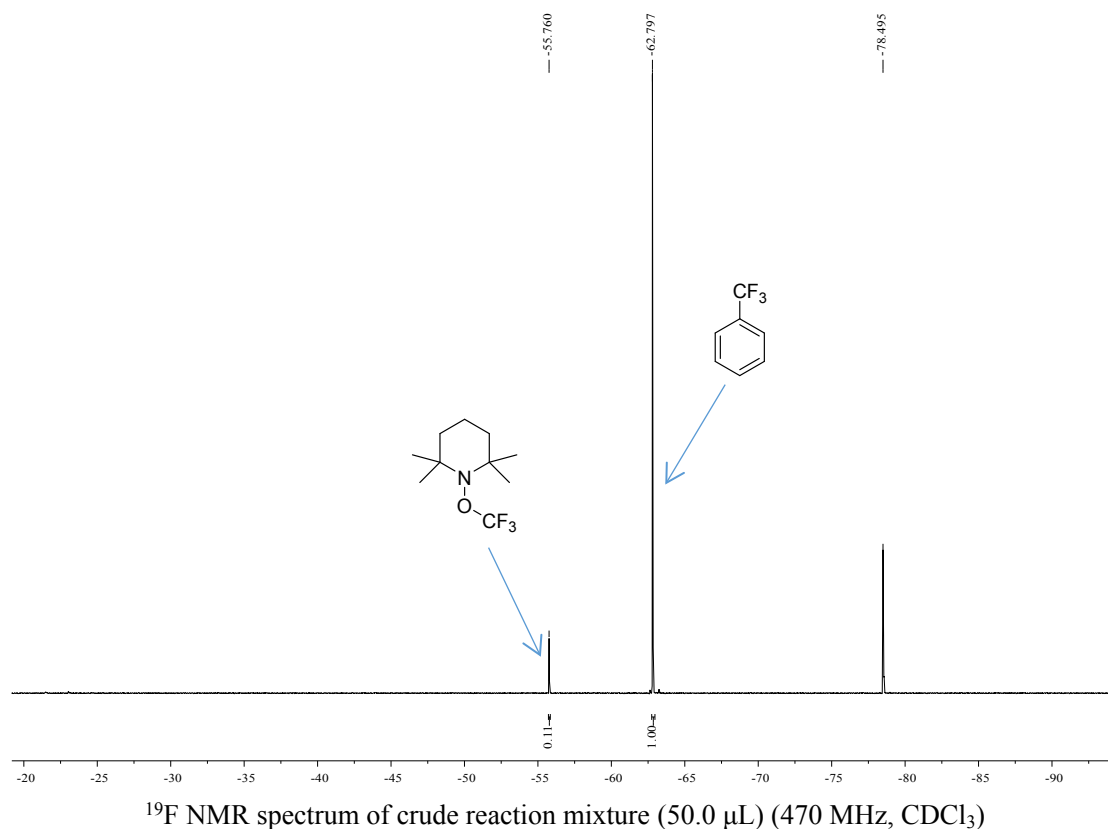

#### 4-2 UV/Vis absorbance studies

UV absorption spectra of *N*-phenyl-*N*-methylacrylamide **1a** (0.10 M), Umemoto's reagent **2** (0.10 M) and mixture of **1a** and **2** in DMF were recorded. There was no increase in UV absorbance upon mixing **1a** and Umemoto's reagent **2**. This clearly excludes the presence of EDA complex between **1a** and Umemoto's reagent **2**.

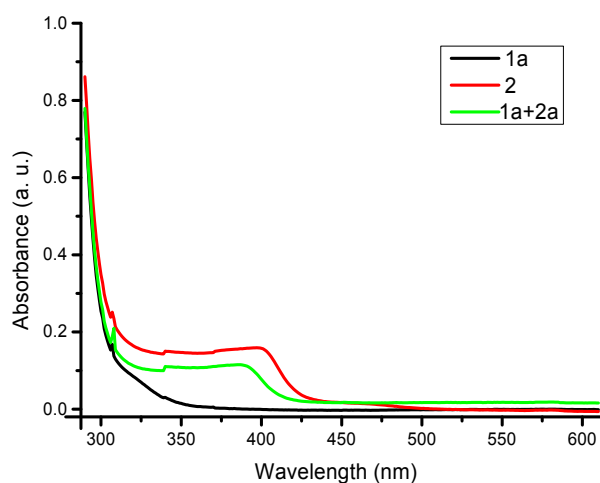

## 5. Copies of NMR Spectra

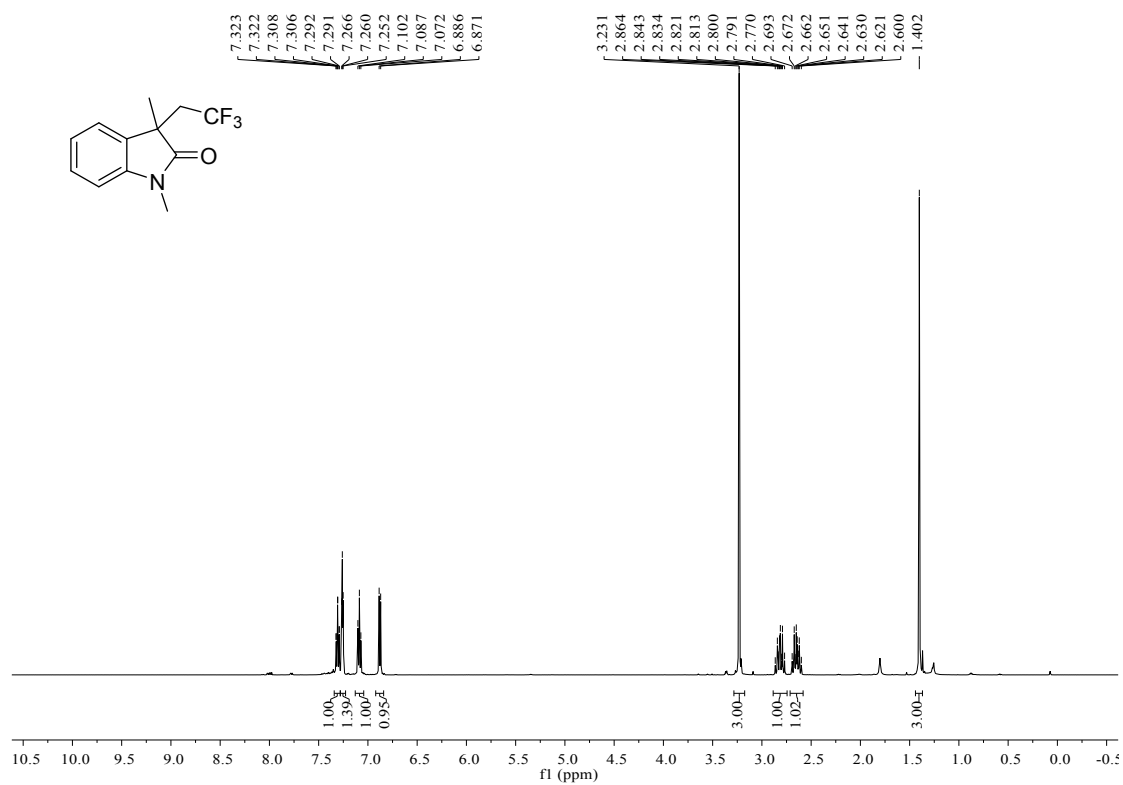

<sup>1</sup>H NMR Spectrum of 3a (500 MHz, CDCl<sub>3</sub>)

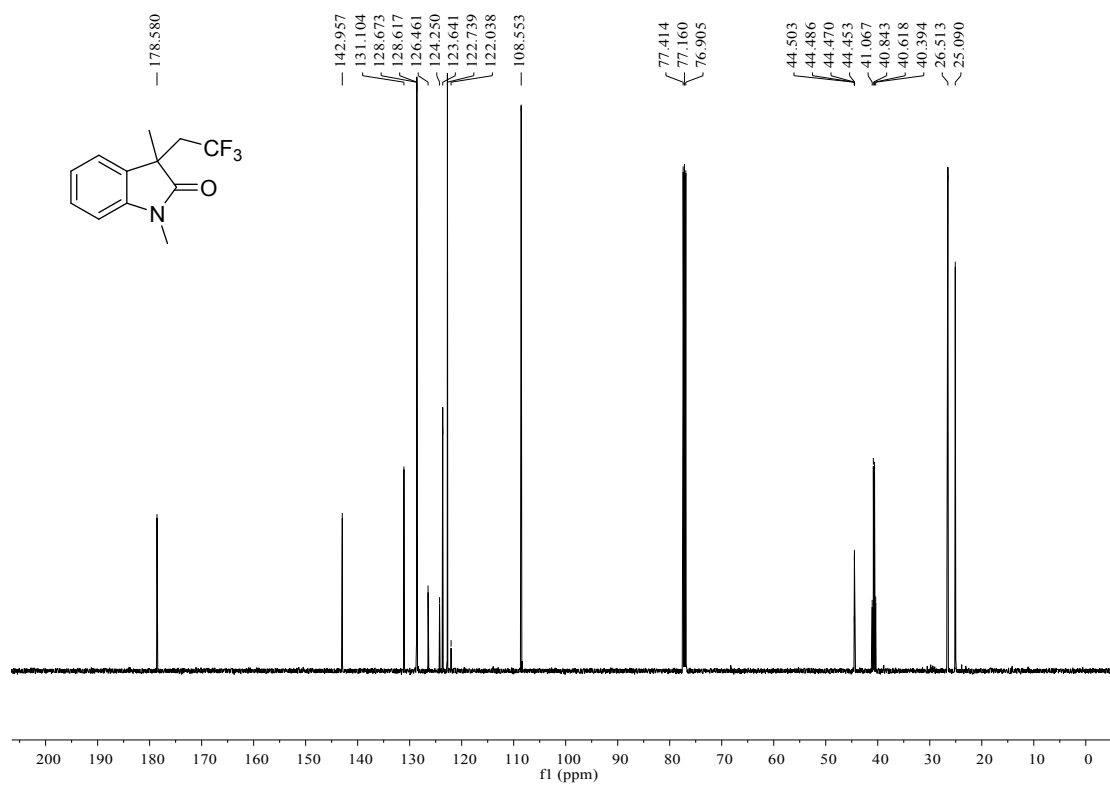

<sup>13</sup>C NMR Spectrum of 3a (126 MHz, CDCl<sub>3</sub>)

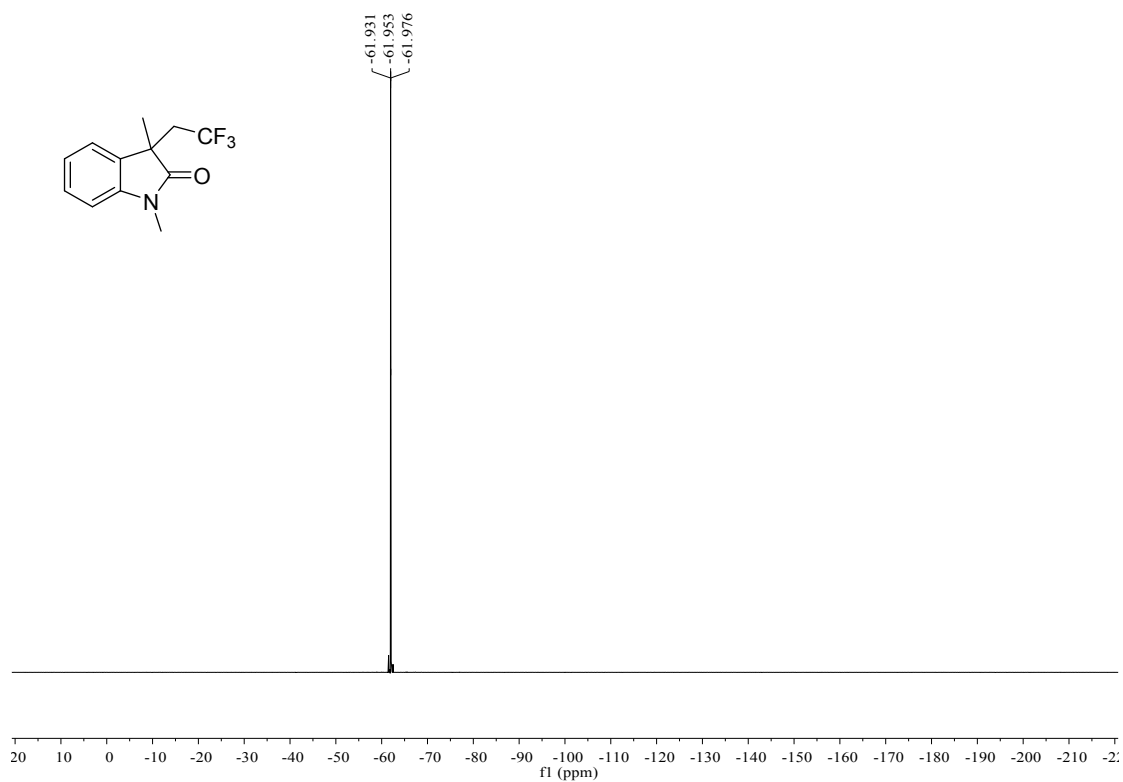

$^{19}\text{F}$  NMR Spectrum of **3a** (470 MHz,  $\text{CDCl}_3$ )

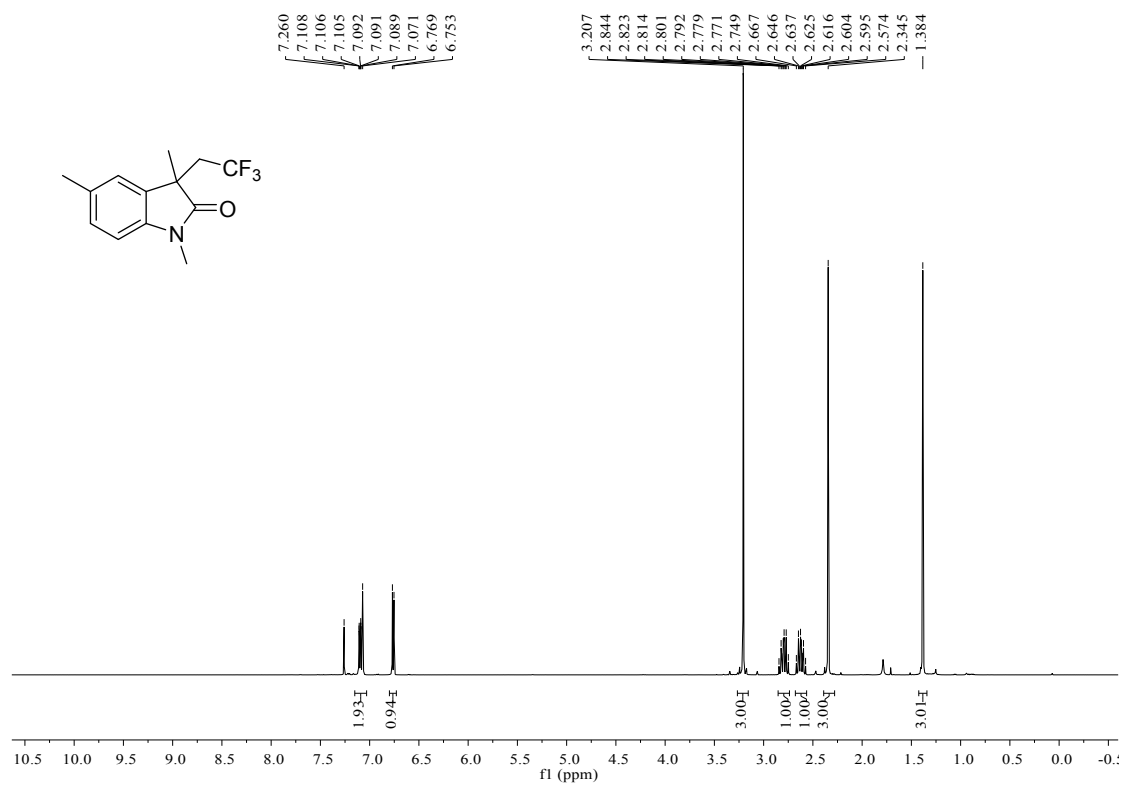

$^1\text{H}$  NMR Spectrum of **3b** (500 MHz,  $\text{CDCl}_3$ )



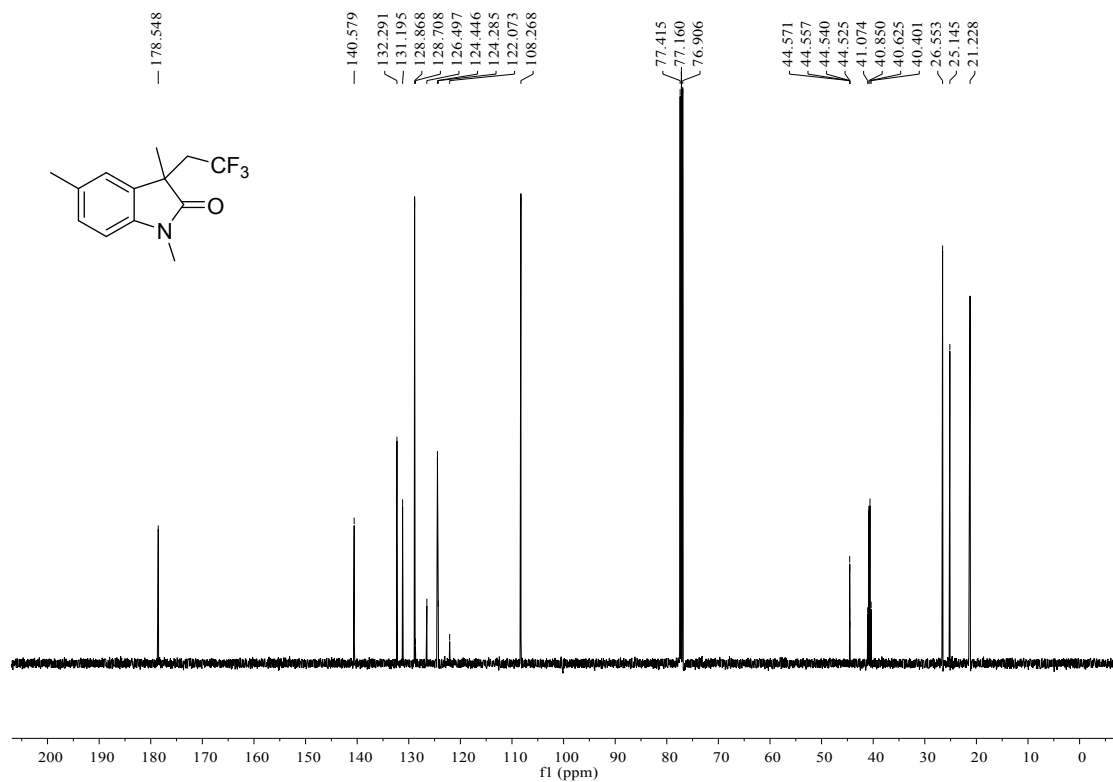

<sup>13</sup>C NMR Spectrum of **3b** (126 MHz, CDCl<sub>3</sub>)

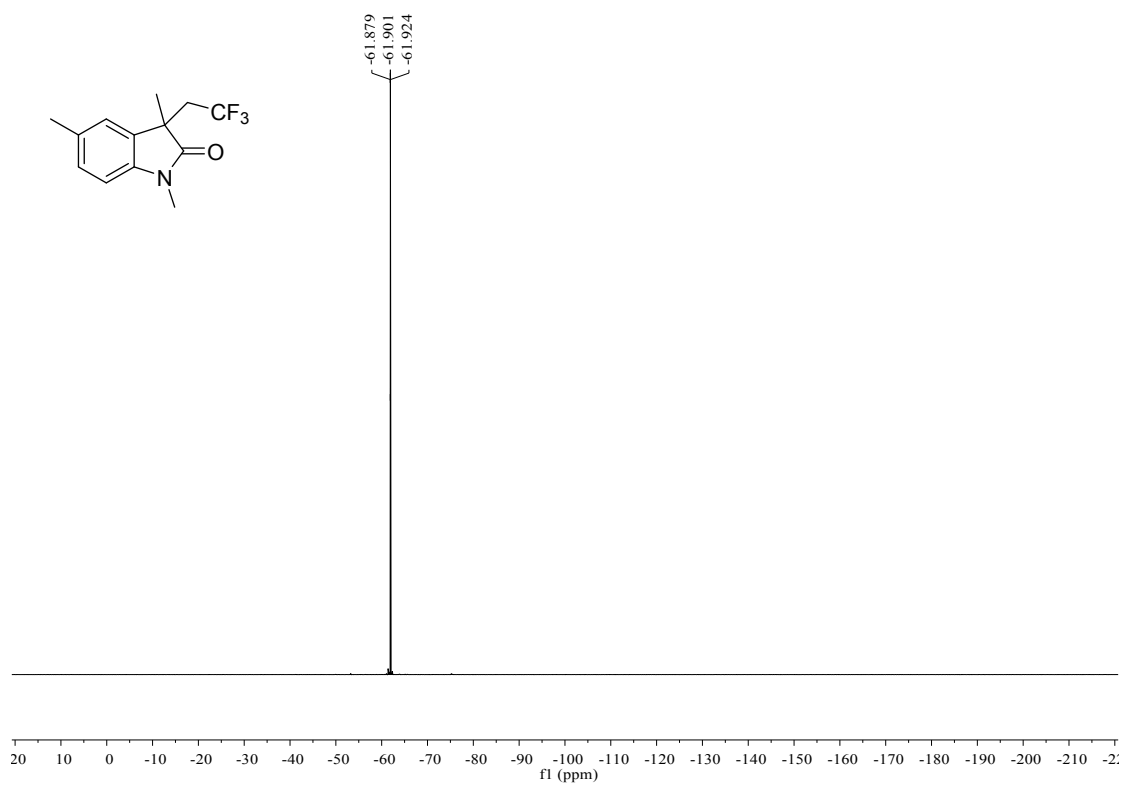

<sup>19</sup>F NMR Spectrum of **3b** (470 MHz, CDCl<sub>3</sub>)

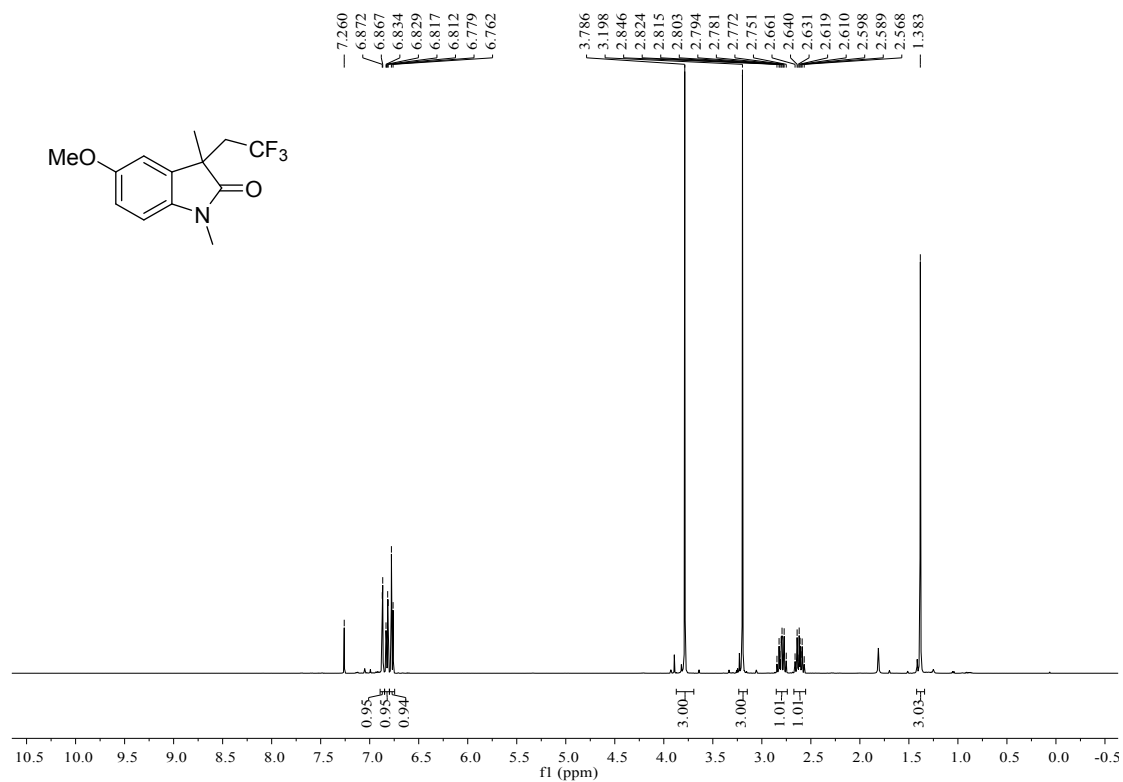

**<sup>1</sup>H NMR Spectrum of 3c (500 MHz, CDCl<sub>3</sub>)**

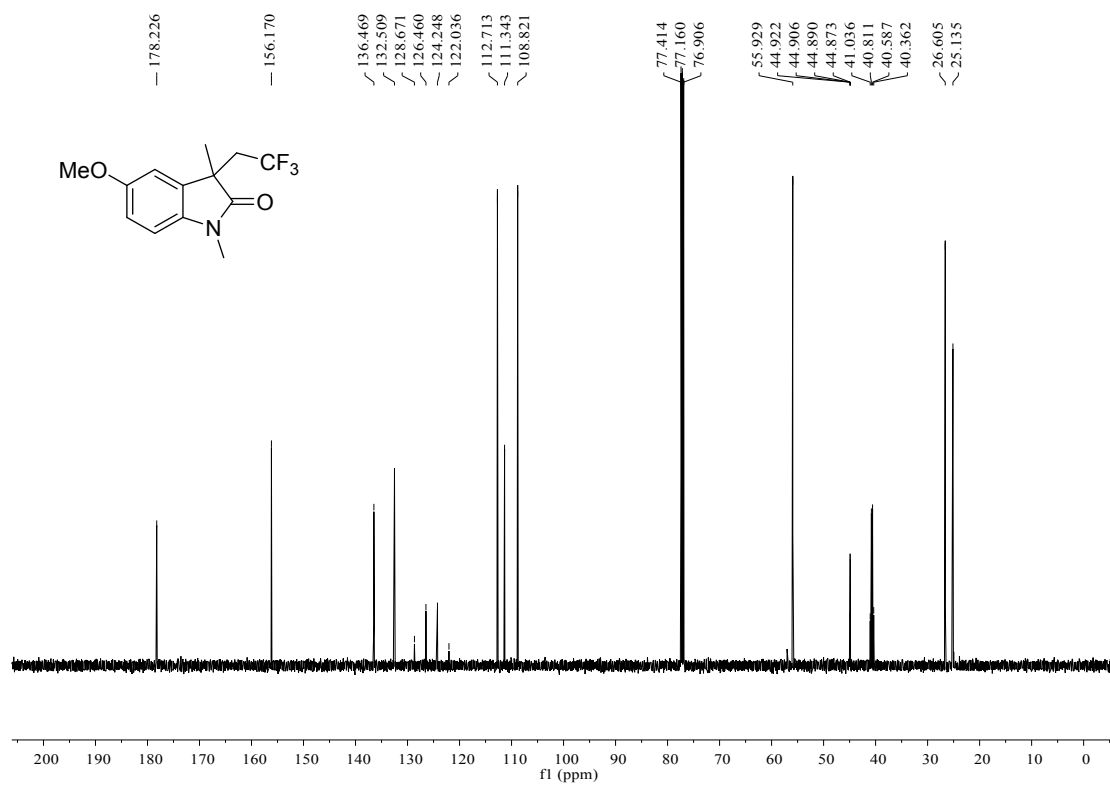

**<sup>13</sup>C NMR Spectrum of 3c (126 MHz, CDCl<sub>3</sub>)**

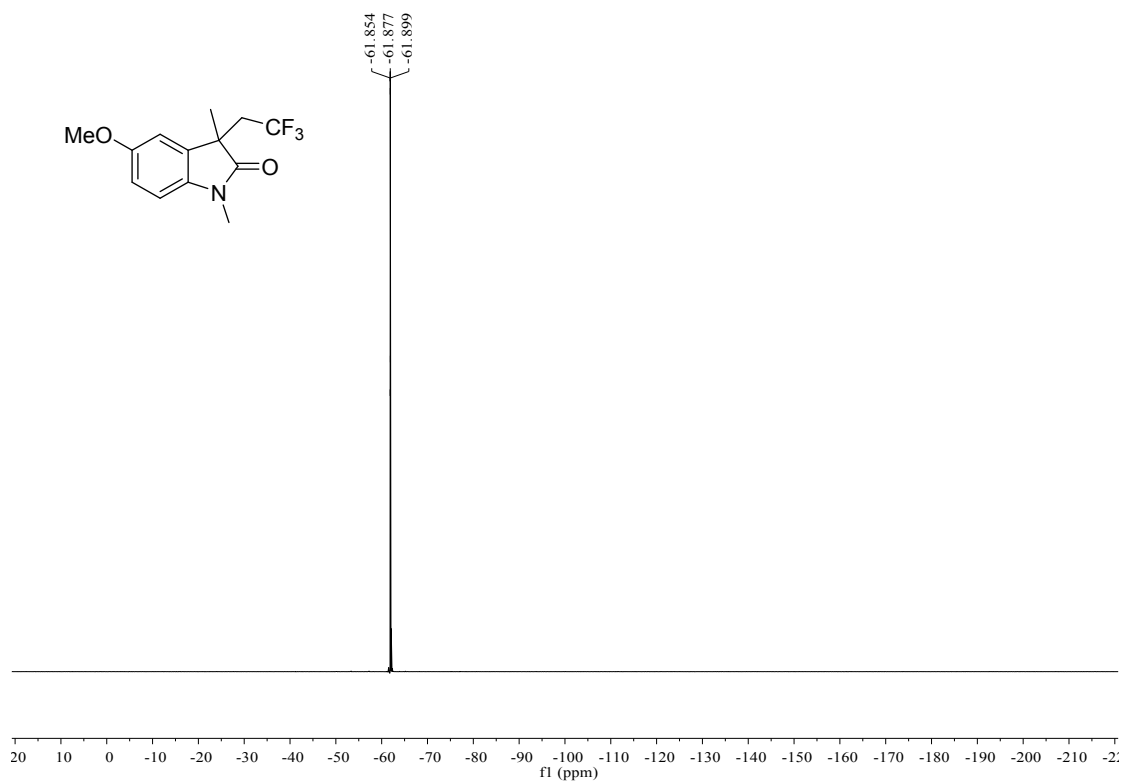

$^{19}\text{F}$  NMR Spectrum of **3c** (470 MHz,  $\text{CDCl}_3$ )

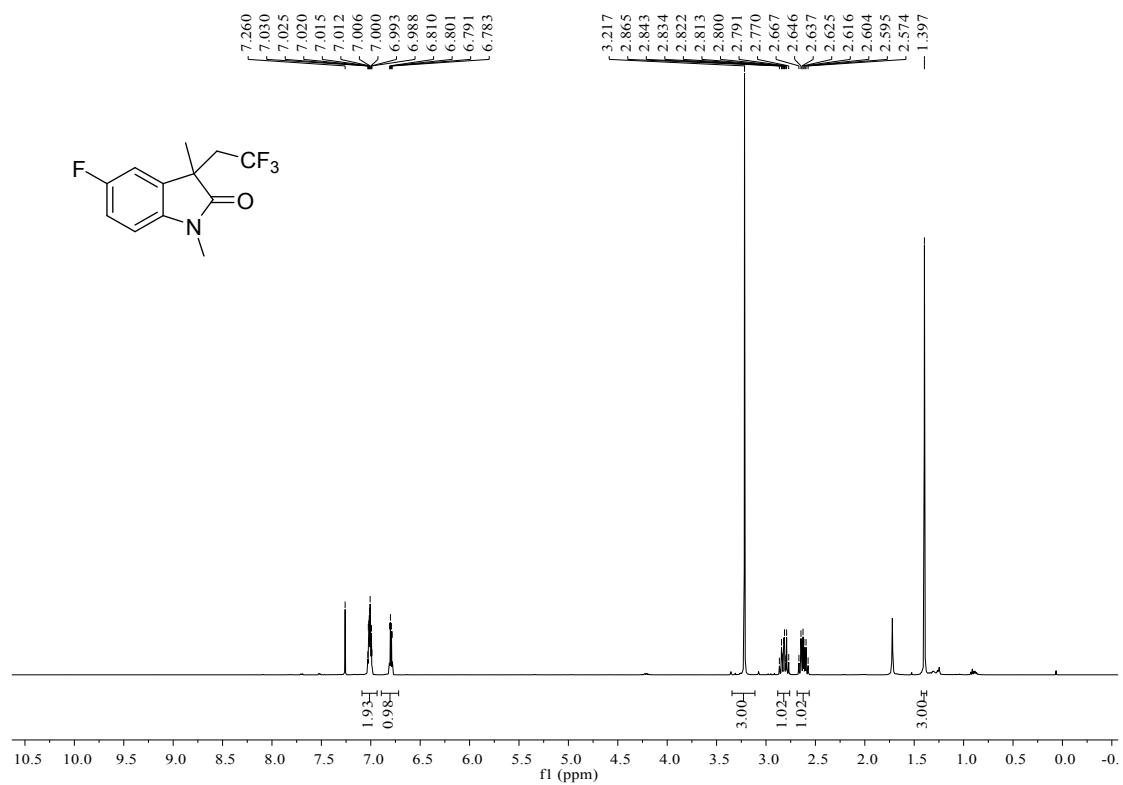

$^1\text{H}$  NMR Spectrum of **3d** (500 MHz,  $\text{CDCl}_3$ )

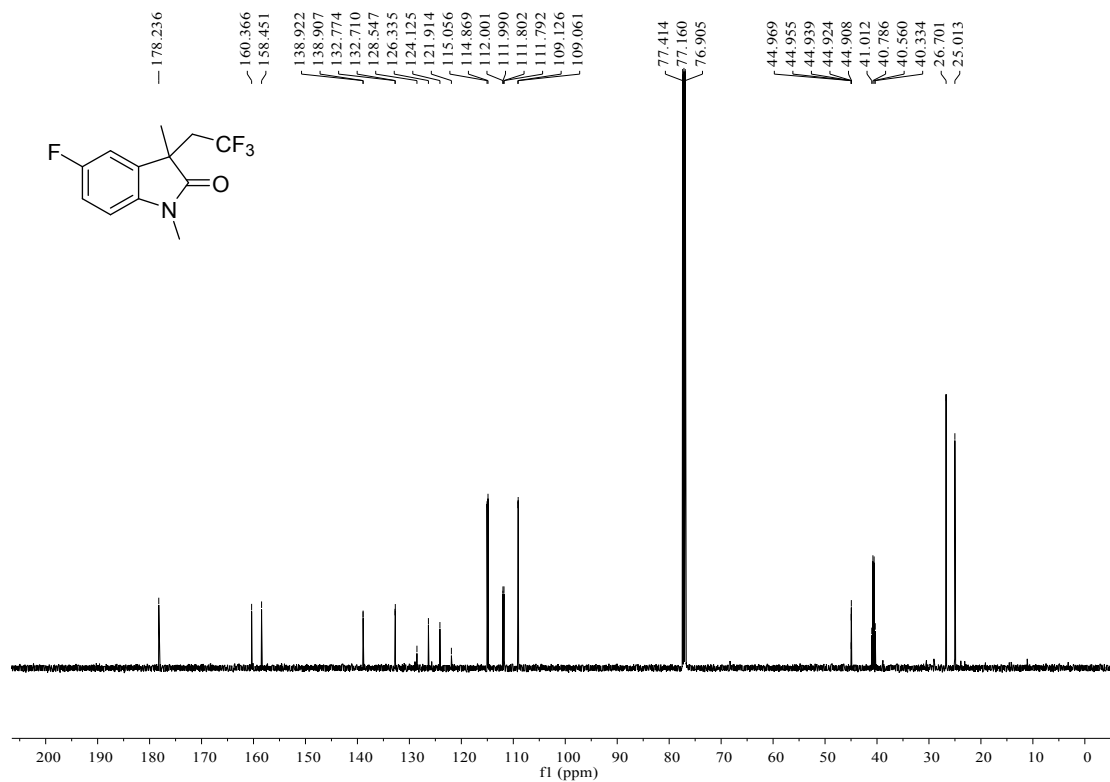

<sup>13</sup>C NMR Spectrum of **3d** (126 MHz, CDCl<sub>3</sub>)

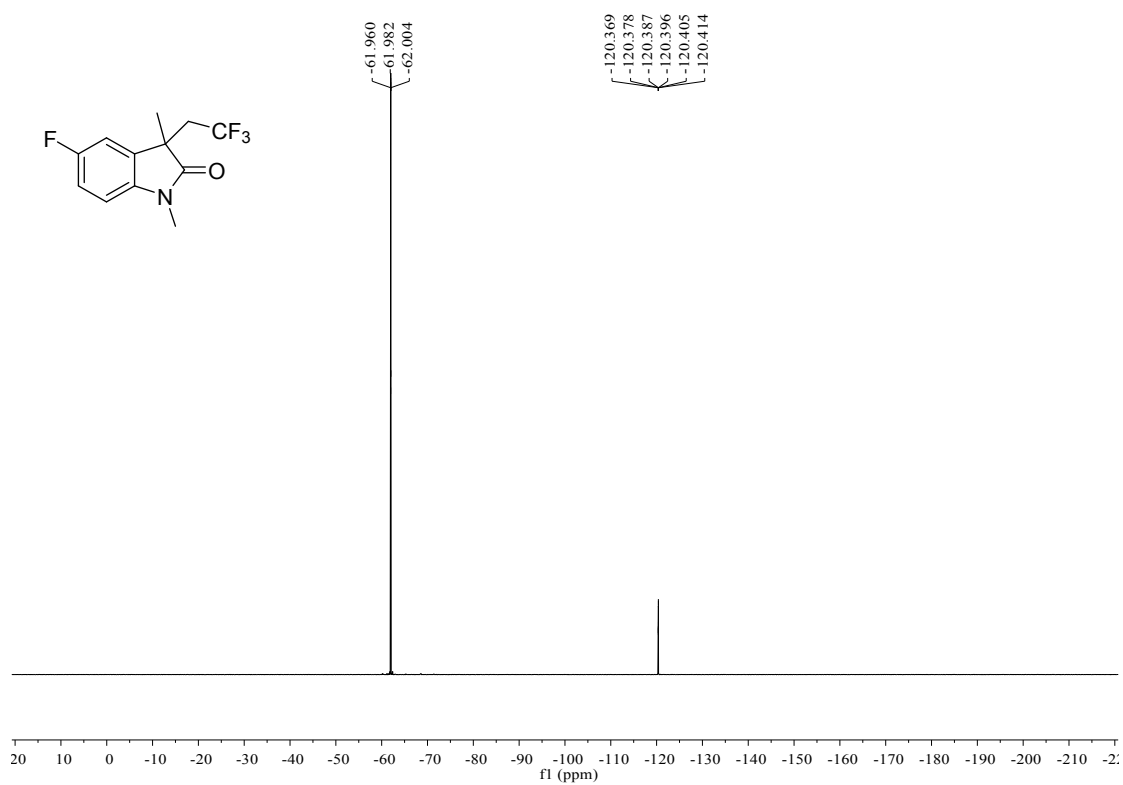

<sup>19</sup>F NMR Spectrum of **3d** (470 MHz, CDCl<sub>3</sub>)

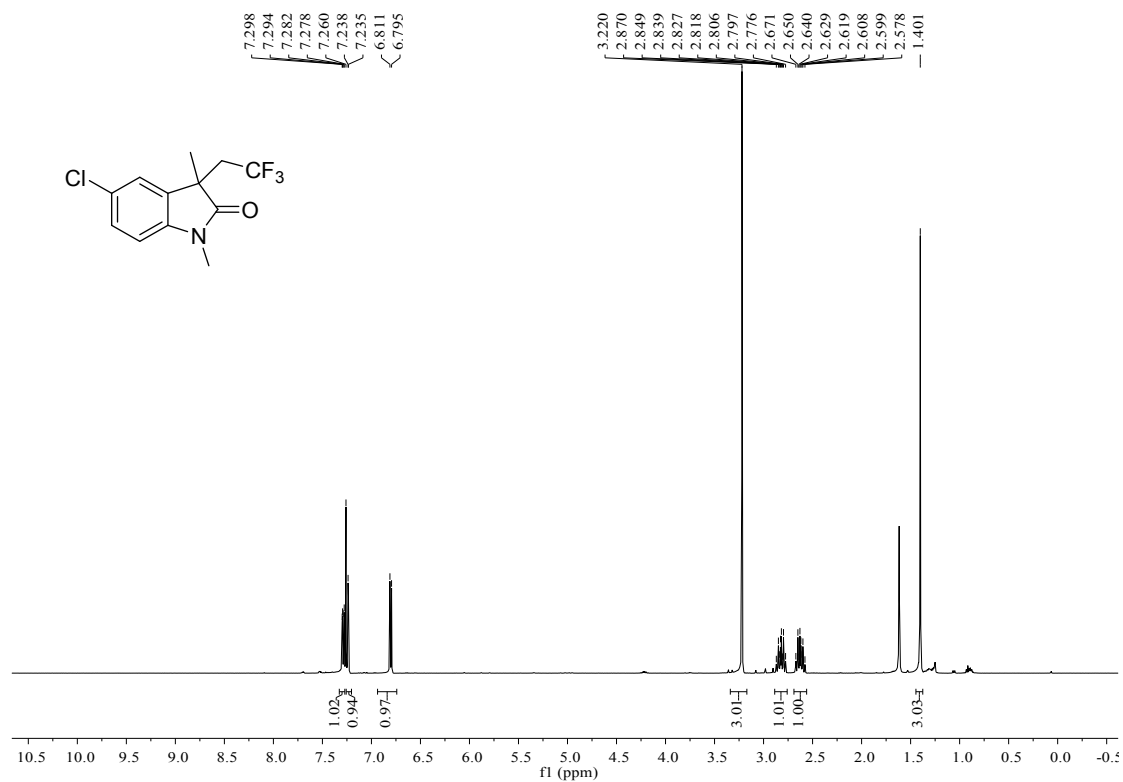

<sup>1</sup>H NMR Spectrum of 3e (500 MHz, CDCl<sub>3</sub>)

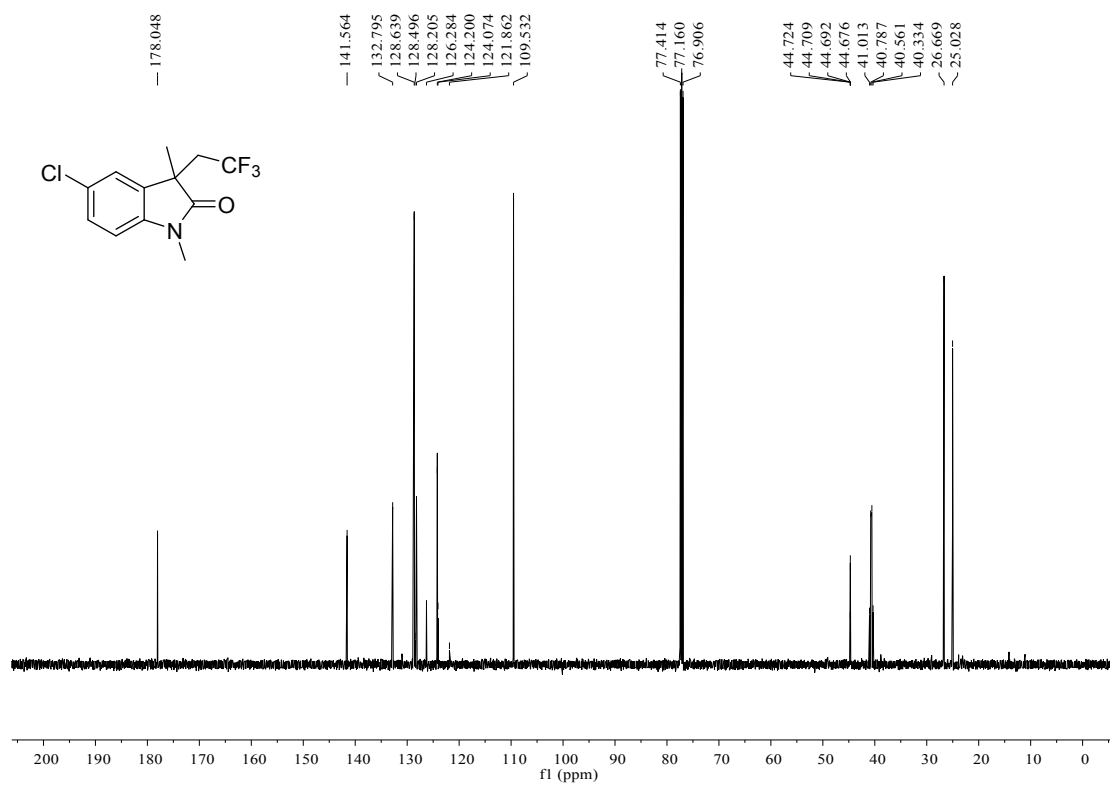

<sup>13</sup>C NMR Spectrum of 3e (126 MHz, CDCl<sub>3</sub>)

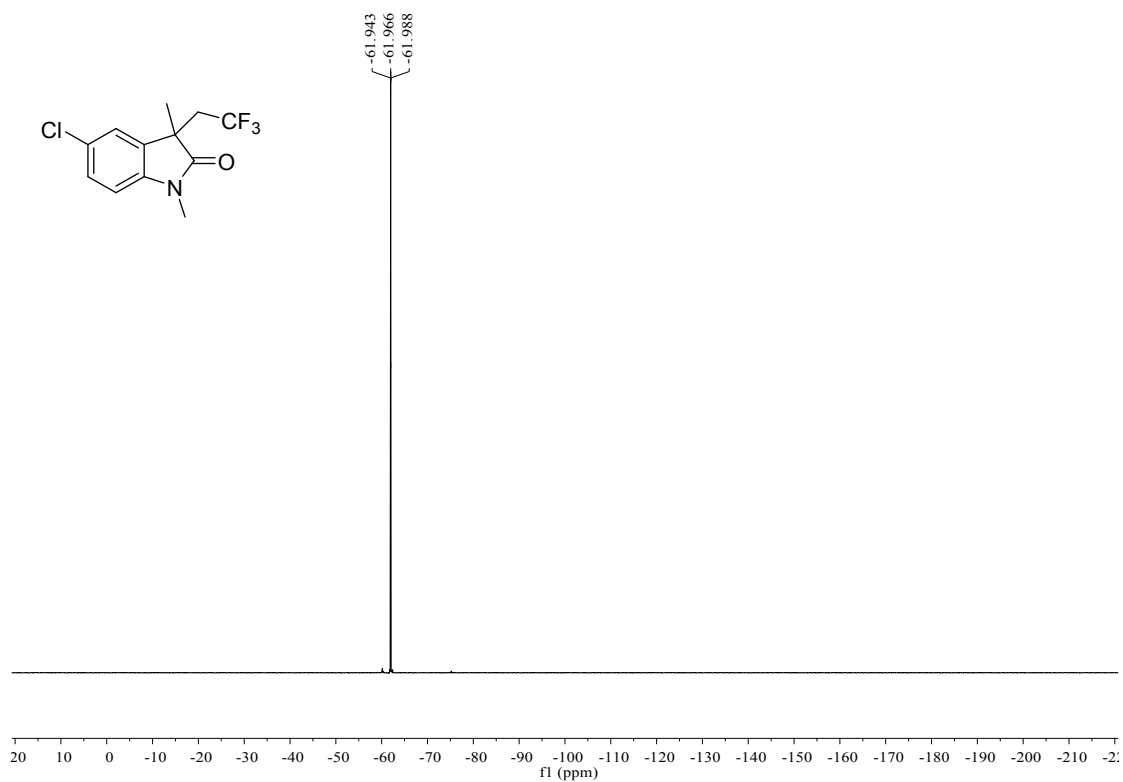

$^{19}\text{F}$  NMR Spectrum of **3e** (470 MHz,  $\text{CDCl}_3$ )

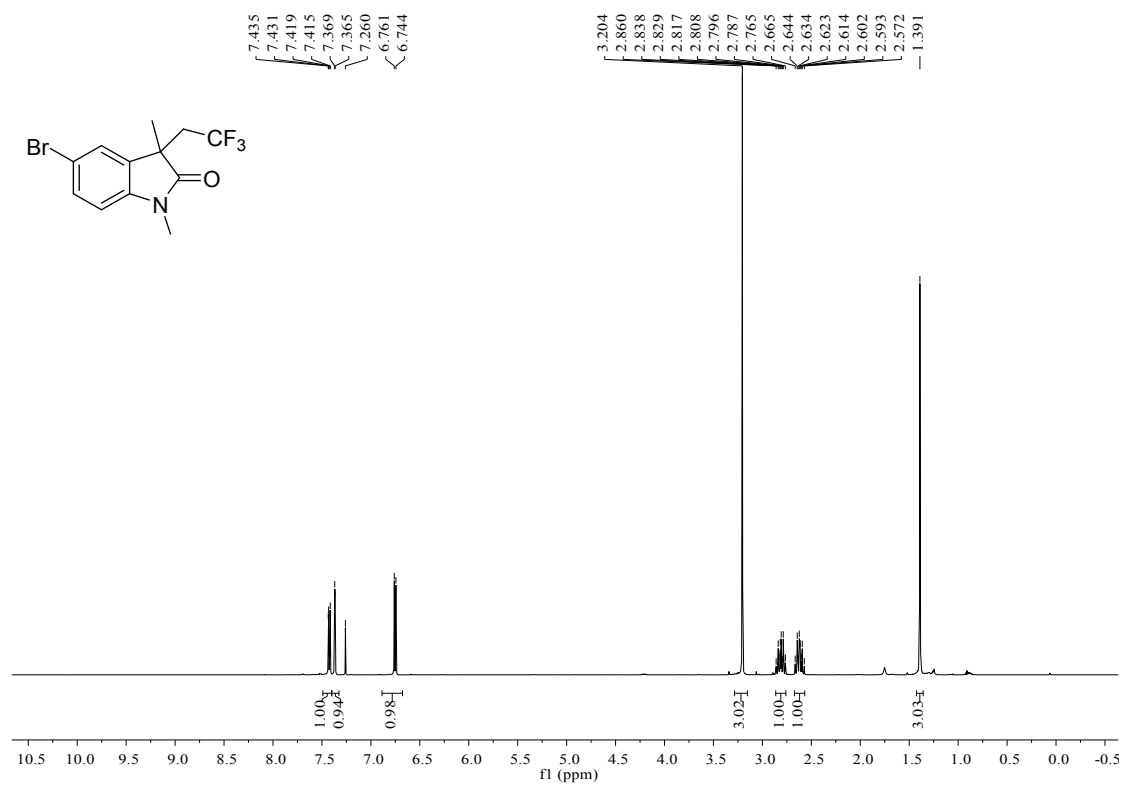

$^1\text{H}$  NMR Spectrum of **3f** (500 MHz,  $\text{CDCl}_3$ )

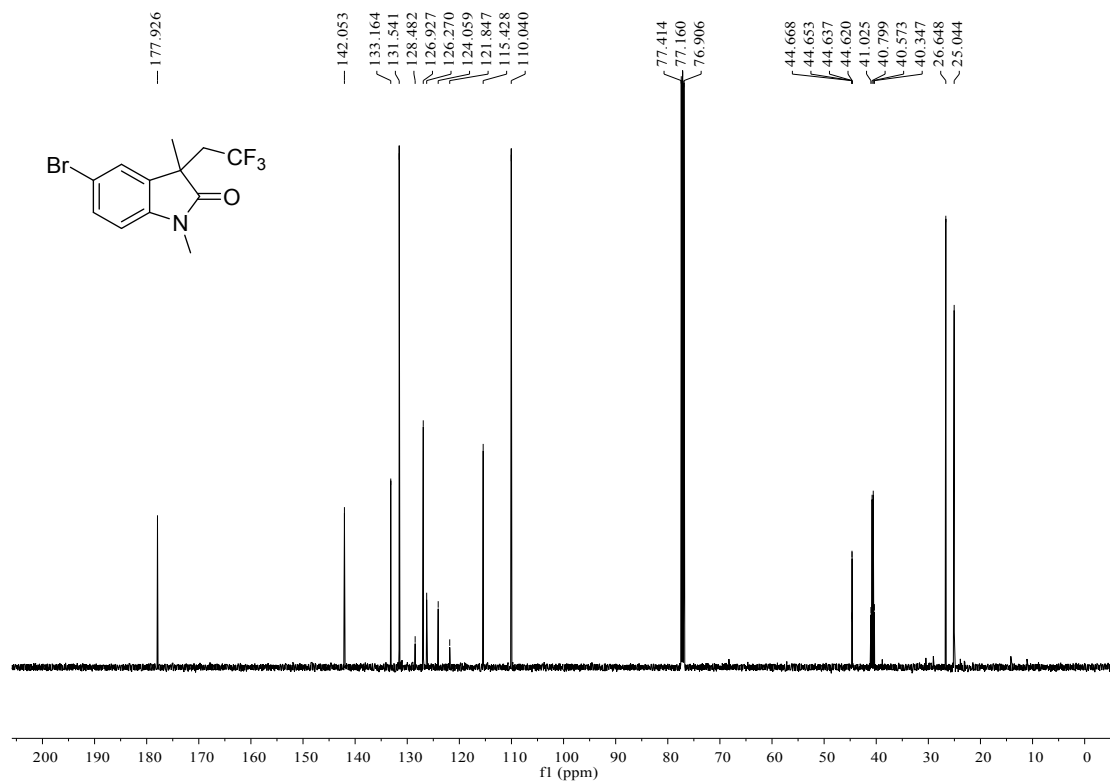

<sup>13</sup>C NMR Spectrum of **3f** (126 MHz, CDCl<sub>3</sub>)

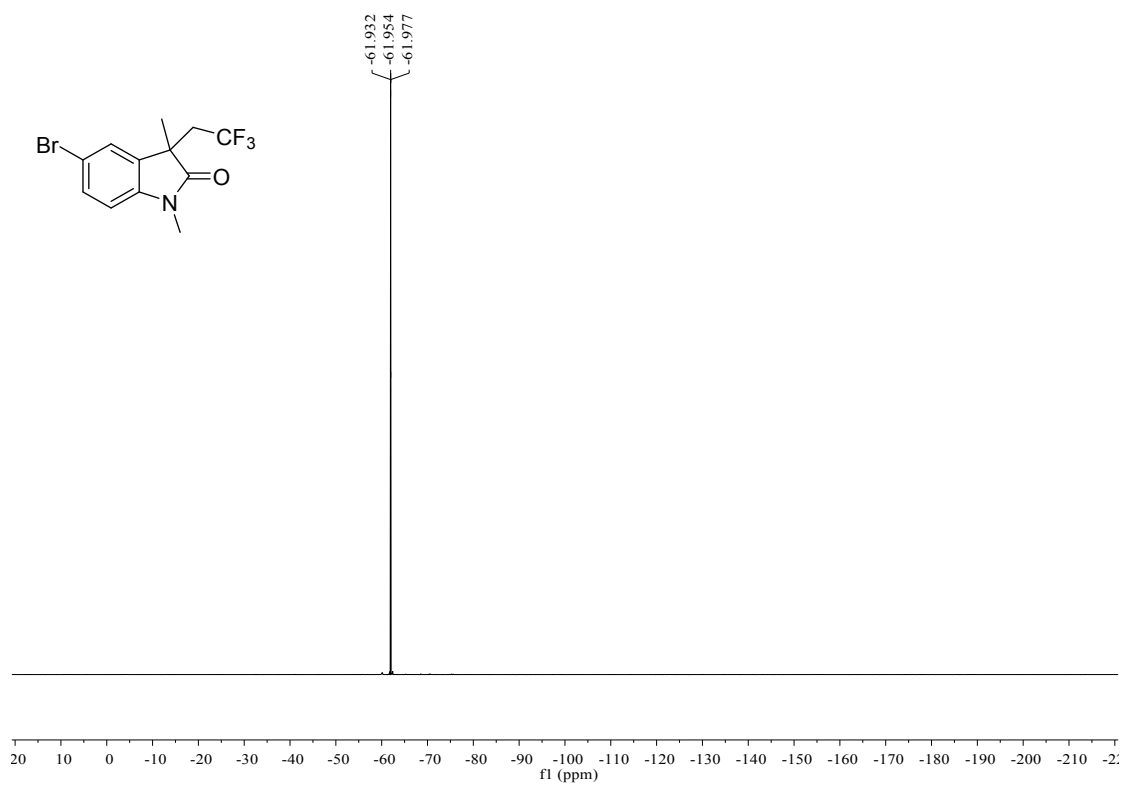

<sup>19</sup>F NMR Spectrum of **3f** (470 MHz, CDCl<sub>3</sub>)

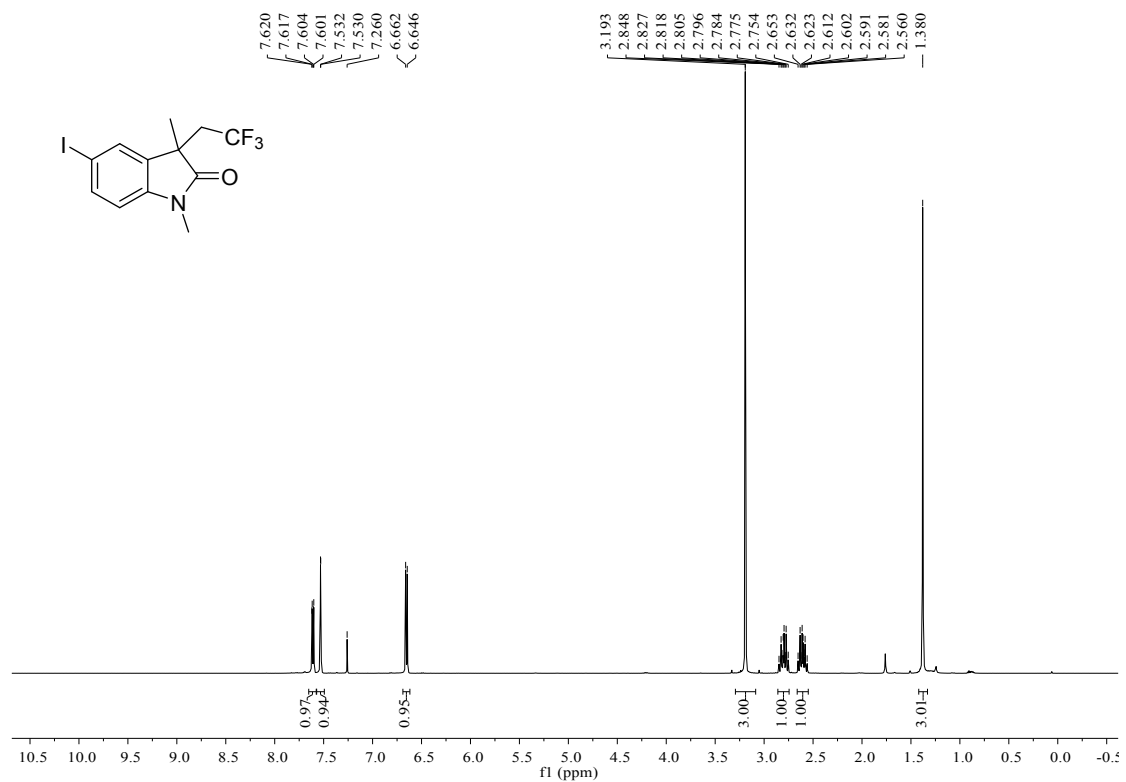

**<sup>1</sup>H NMR Spectrum of 3g (500 MHz, CDCl<sub>3</sub>)**

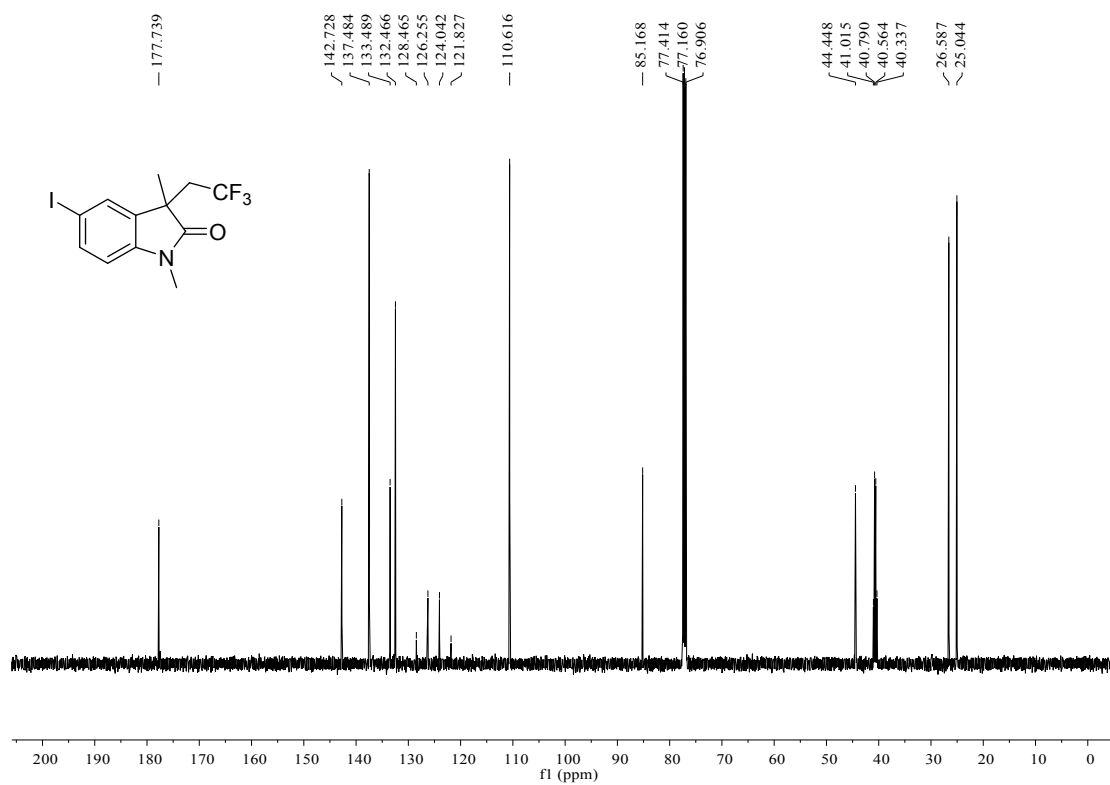

**<sup>13</sup>C NMR Spectrum of 3g (126 MHz, CDCl<sub>3</sub>)**



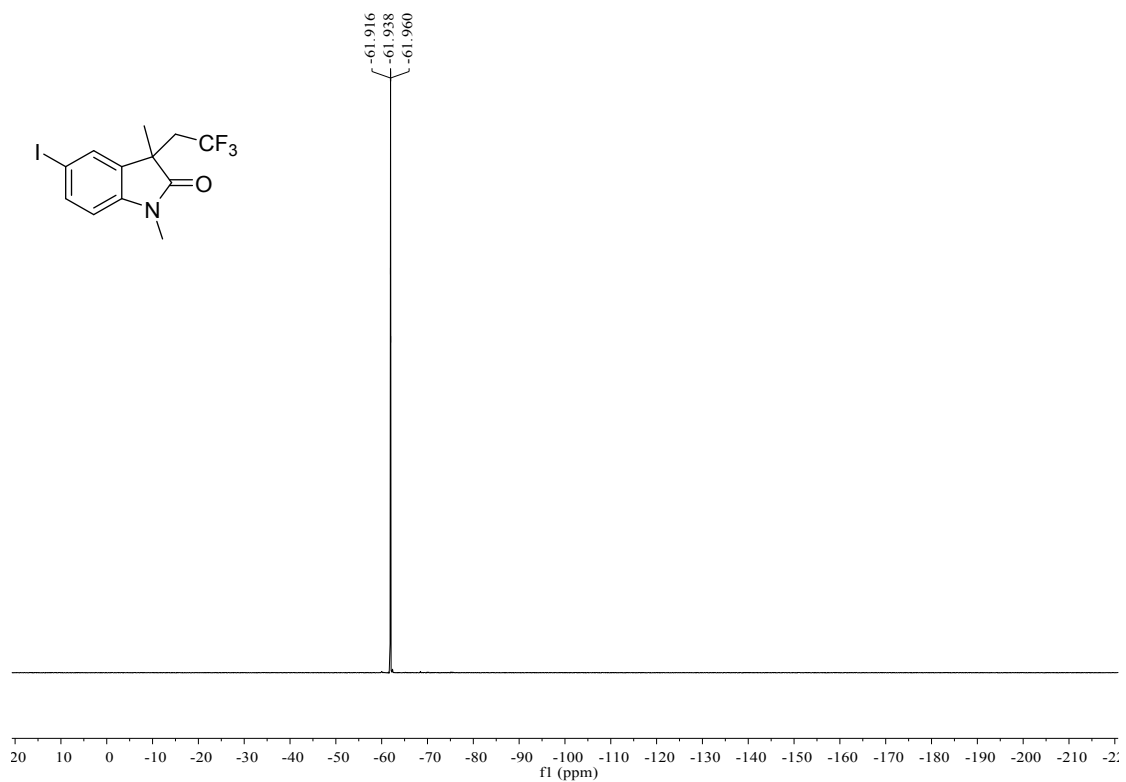

$^{19}\text{F}$  NMR Spectrum of **3g** (470 MHz,  $\text{CDCl}_3$ )

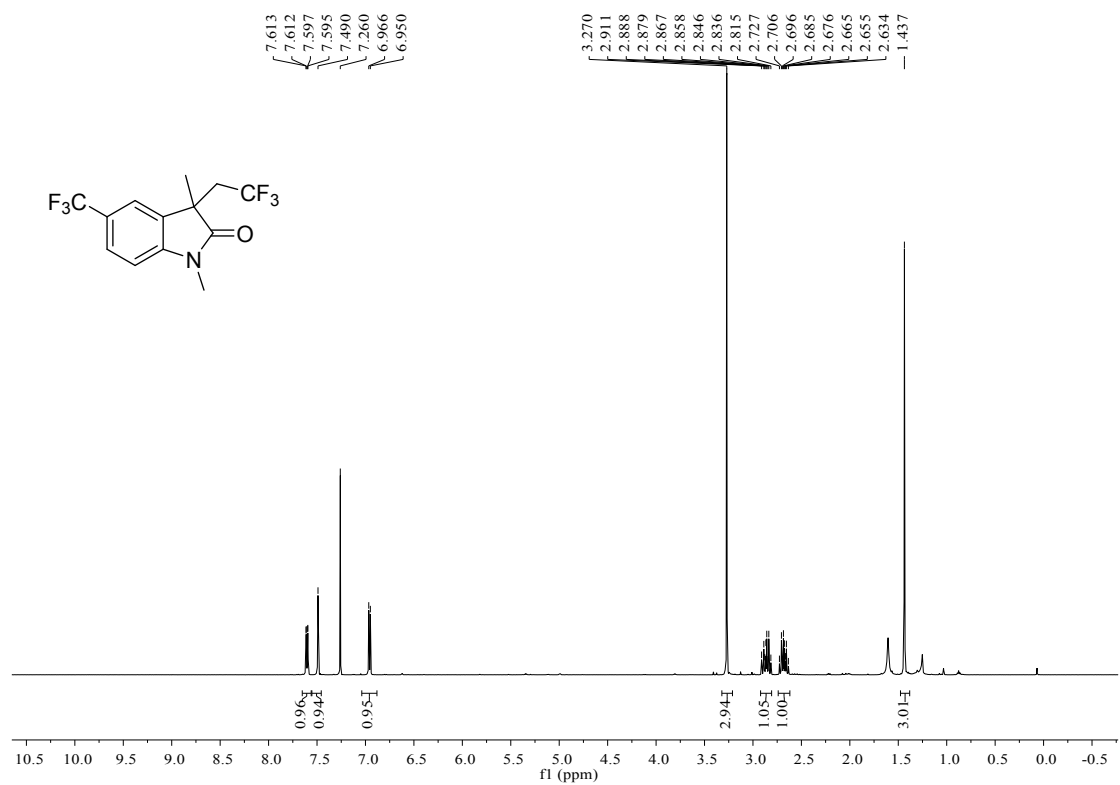

$^1\text{H}$  NMR Spectrum of **3h** (500 MHz,  $\text{CDCl}_3$ )

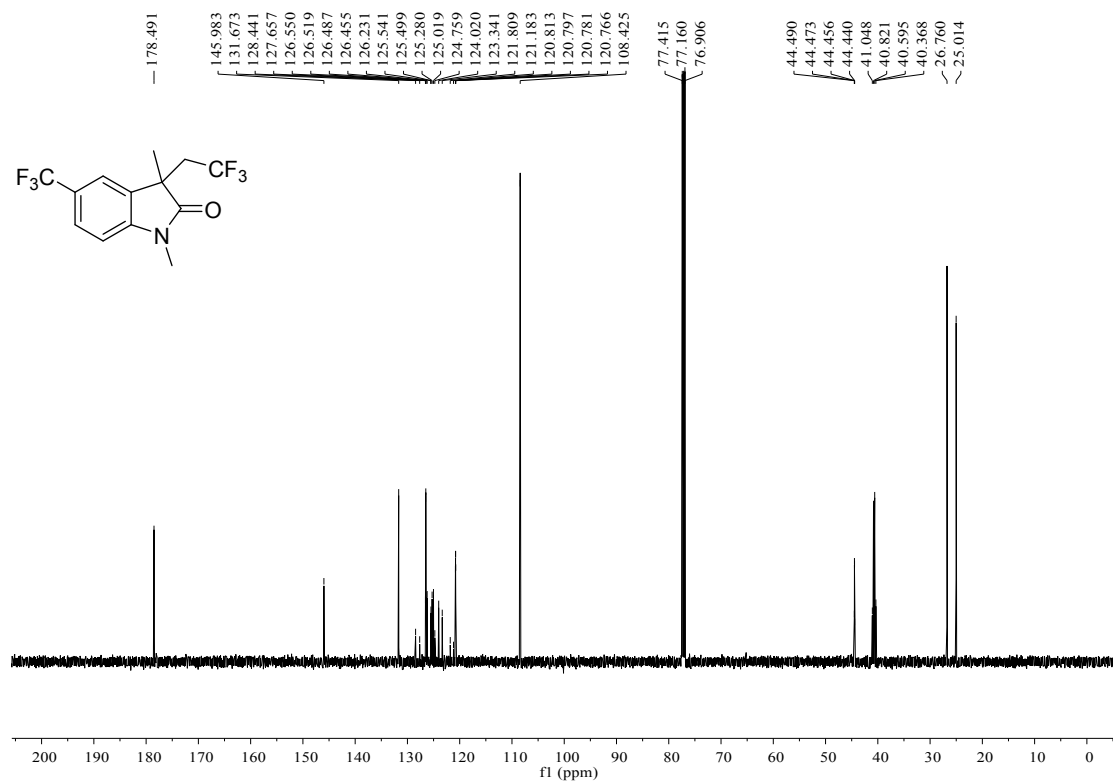

<sup>13</sup>C NMR Spectrum of **3h** (126 MHz, CDCl<sub>3</sub>)

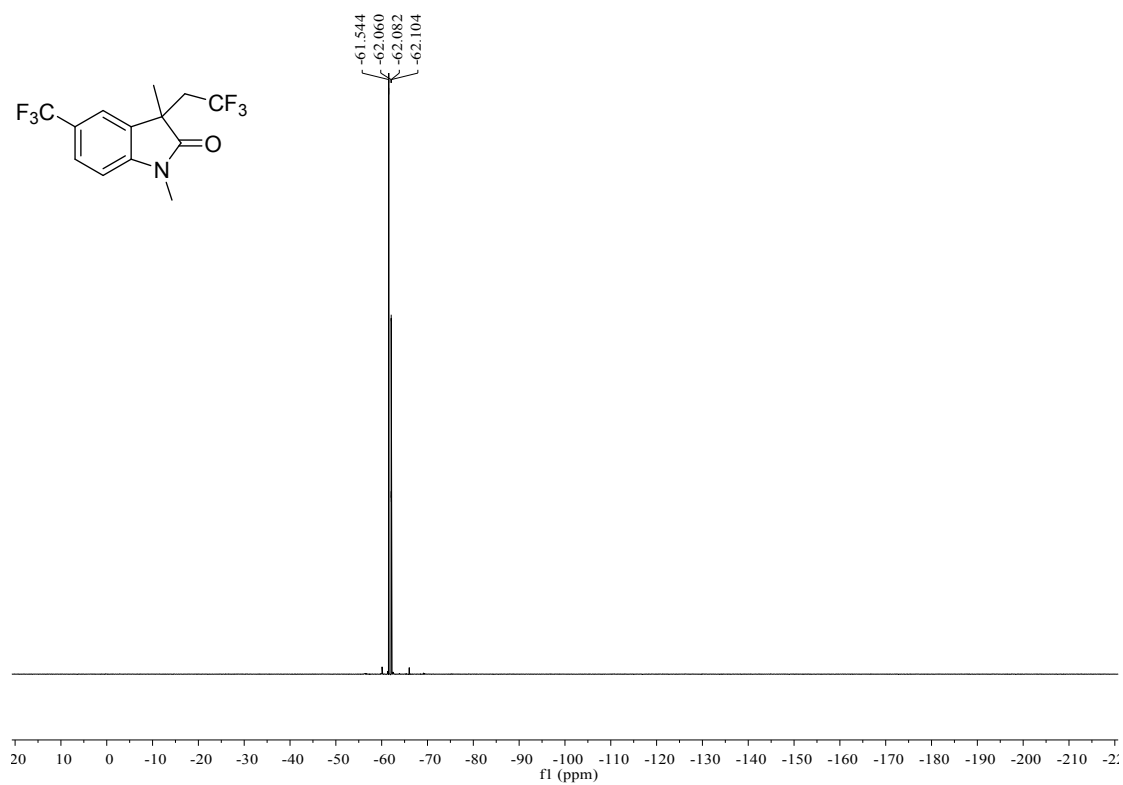

<sup>19</sup>F NMR Spectrum of **3h** (470 MHz, CDCl<sub>3</sub>)

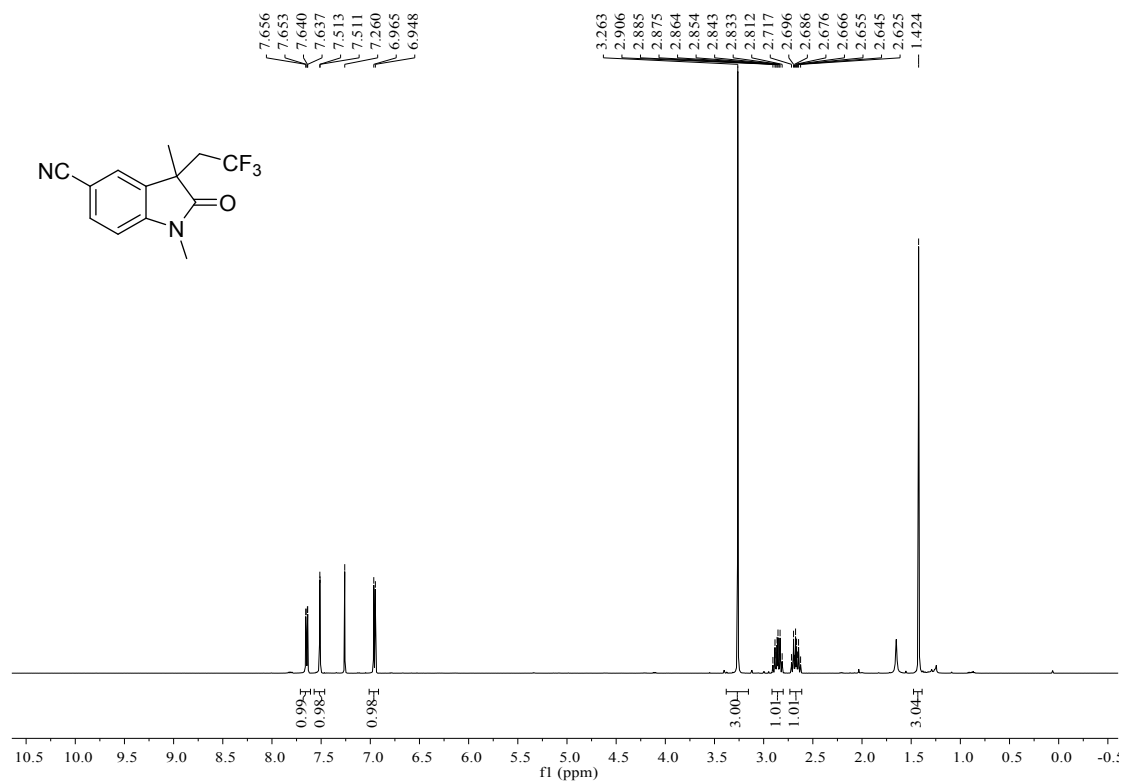

**<sup>1</sup>H NMR Spectrum of **3i** (500 MHz, CDCl<sub>3</sub>)**

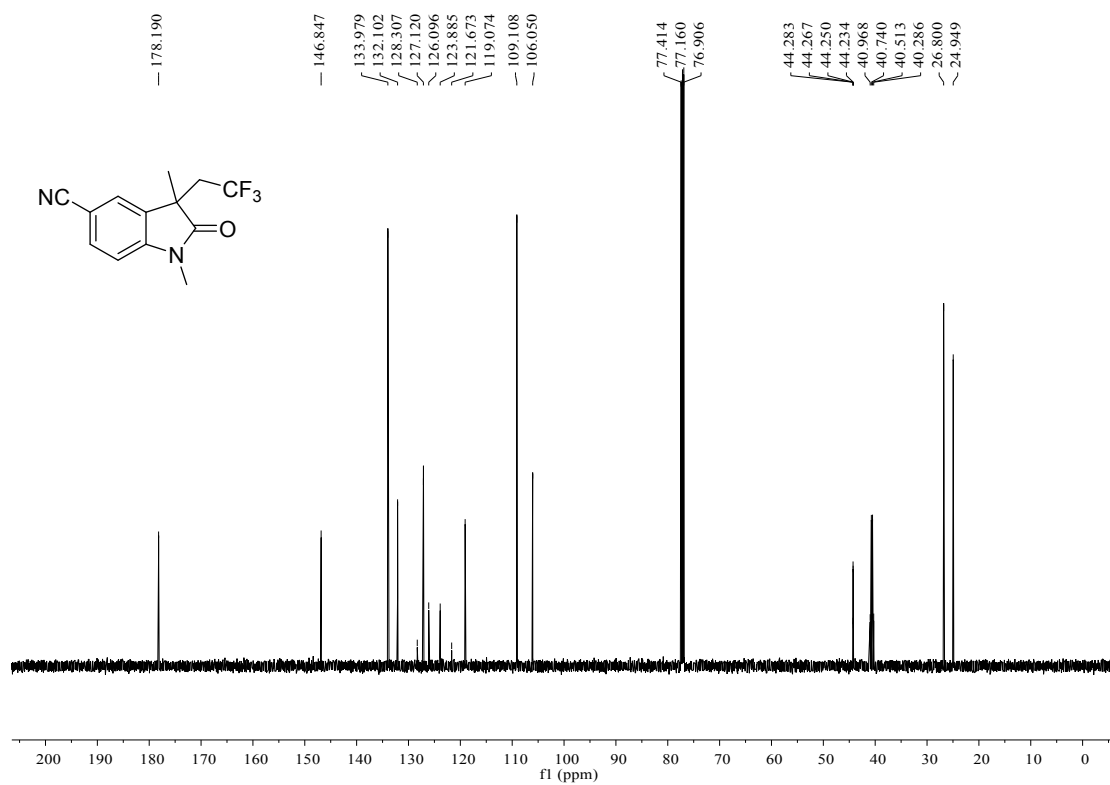

**<sup>13</sup>C NMR Spectrum of **3i** (126 MHz, CDCl<sub>3</sub>)**

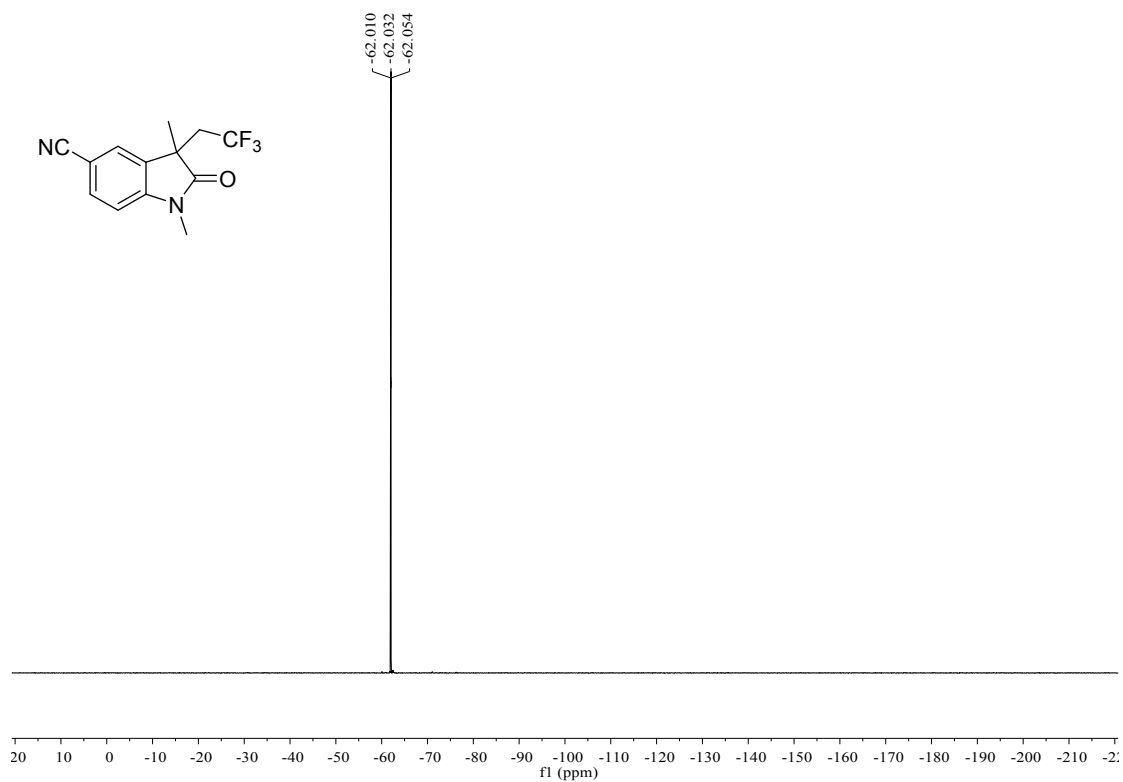

$^{19}\text{F}$  NMR Spectrum of **3i** (470 MHz,  $\text{CDCl}_3$ )

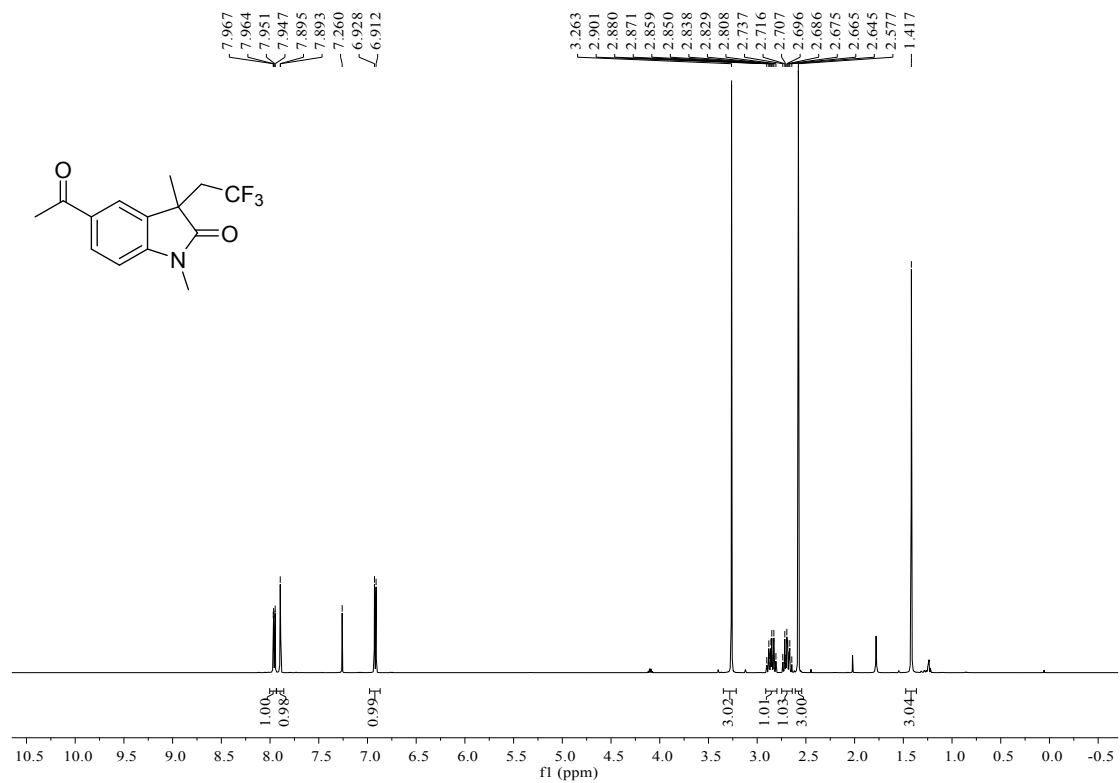

$^1\text{H}$  NMR Spectrum of **3j** (500 MHz,  $\text{CDCl}_3$ )

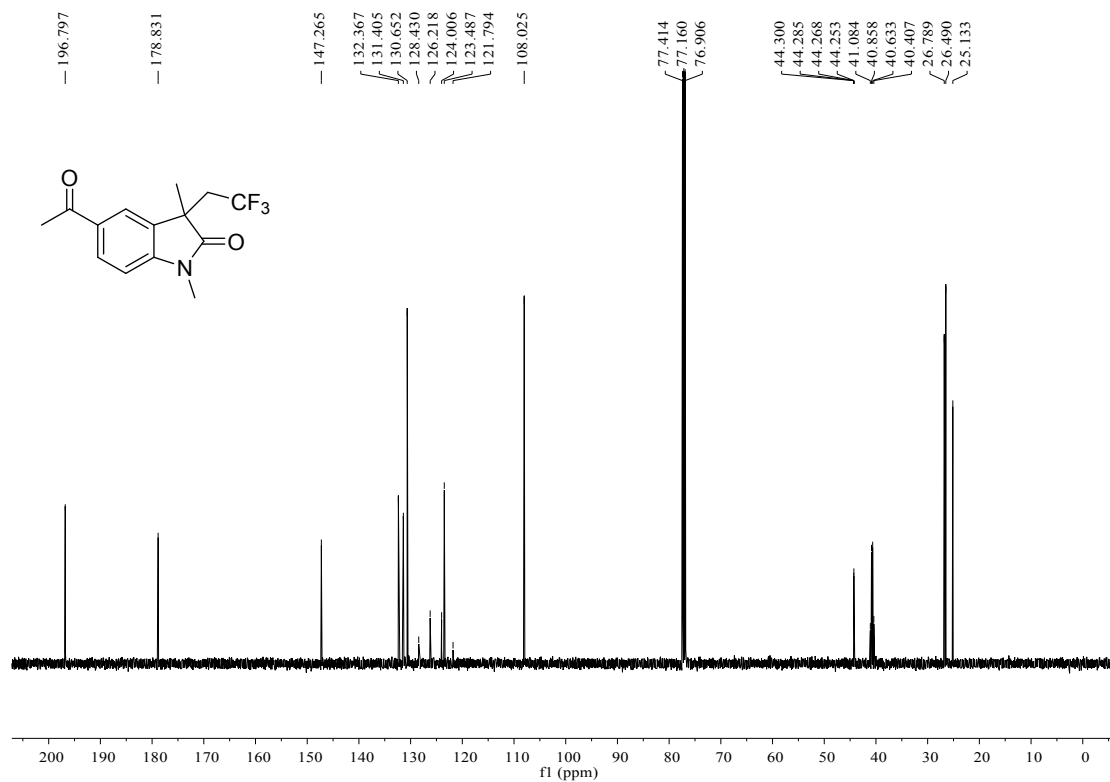

<sup>13</sup>C NMR Spectrum of **3j** (126 MHz, CDCl<sub>3</sub>)

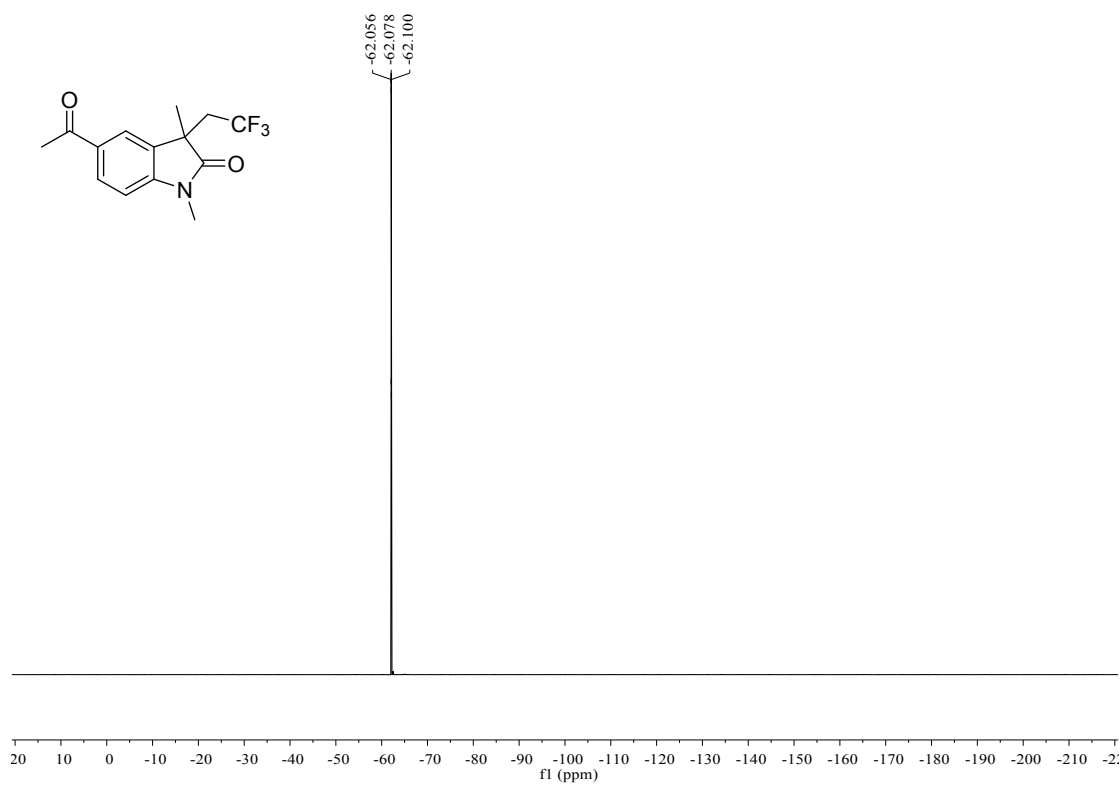

<sup>19</sup>F NMR Spectrum of **3j** (470 MHz, CDCl<sub>3</sub>)

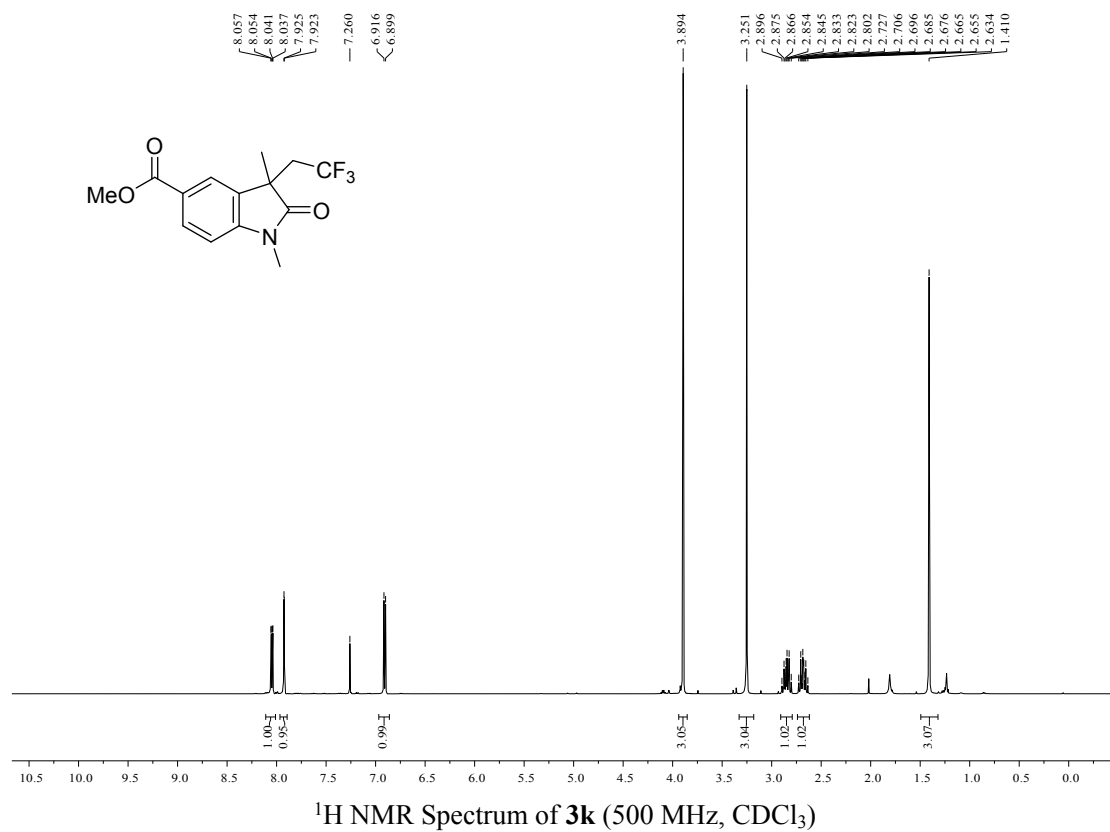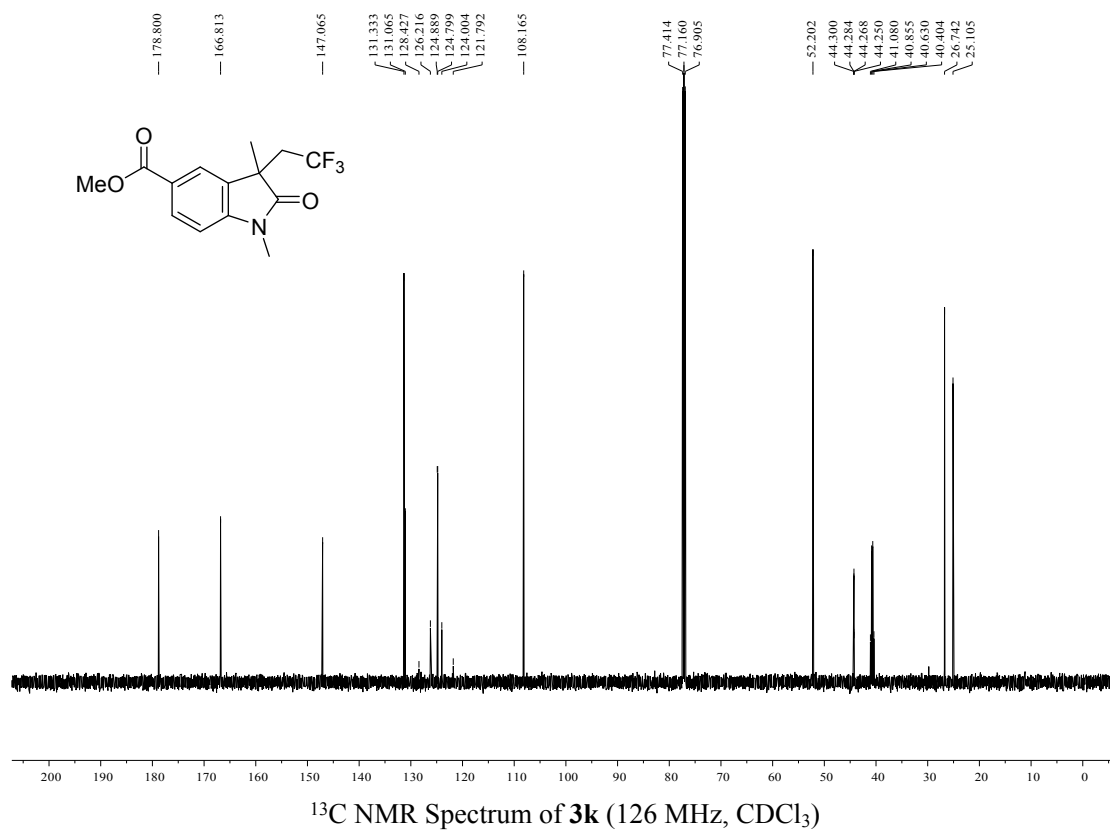

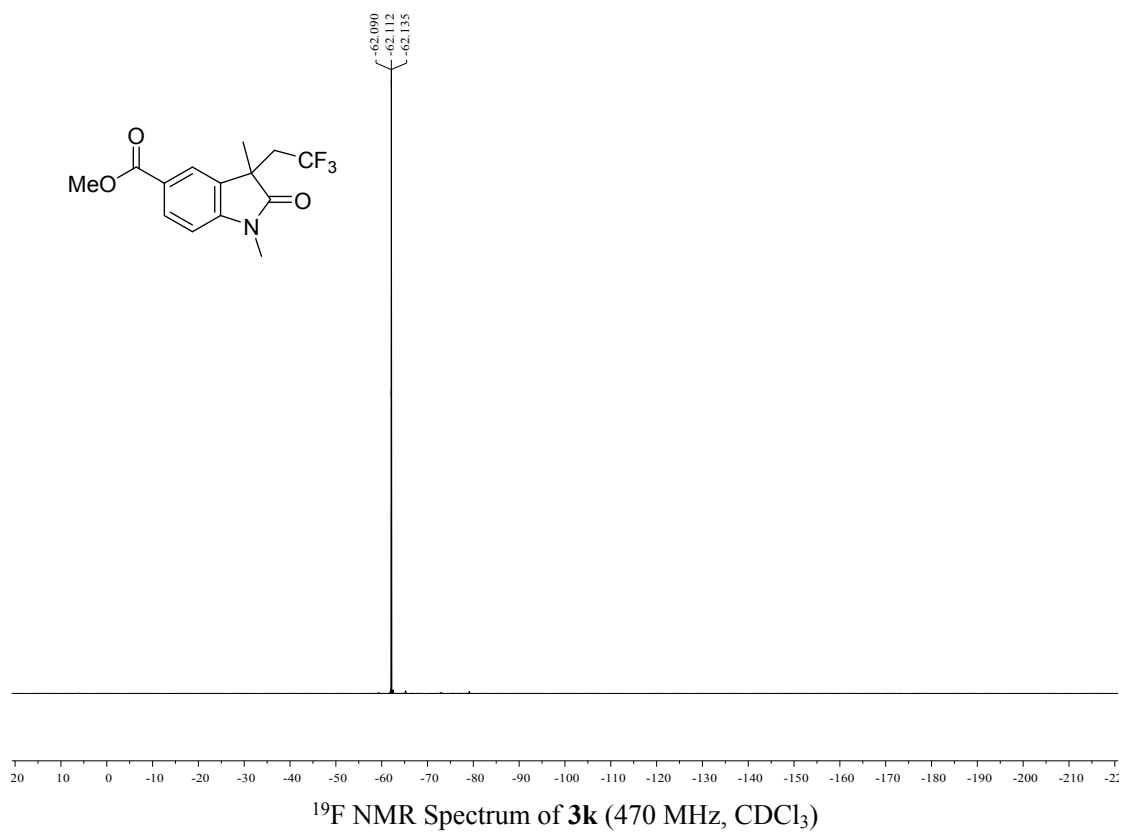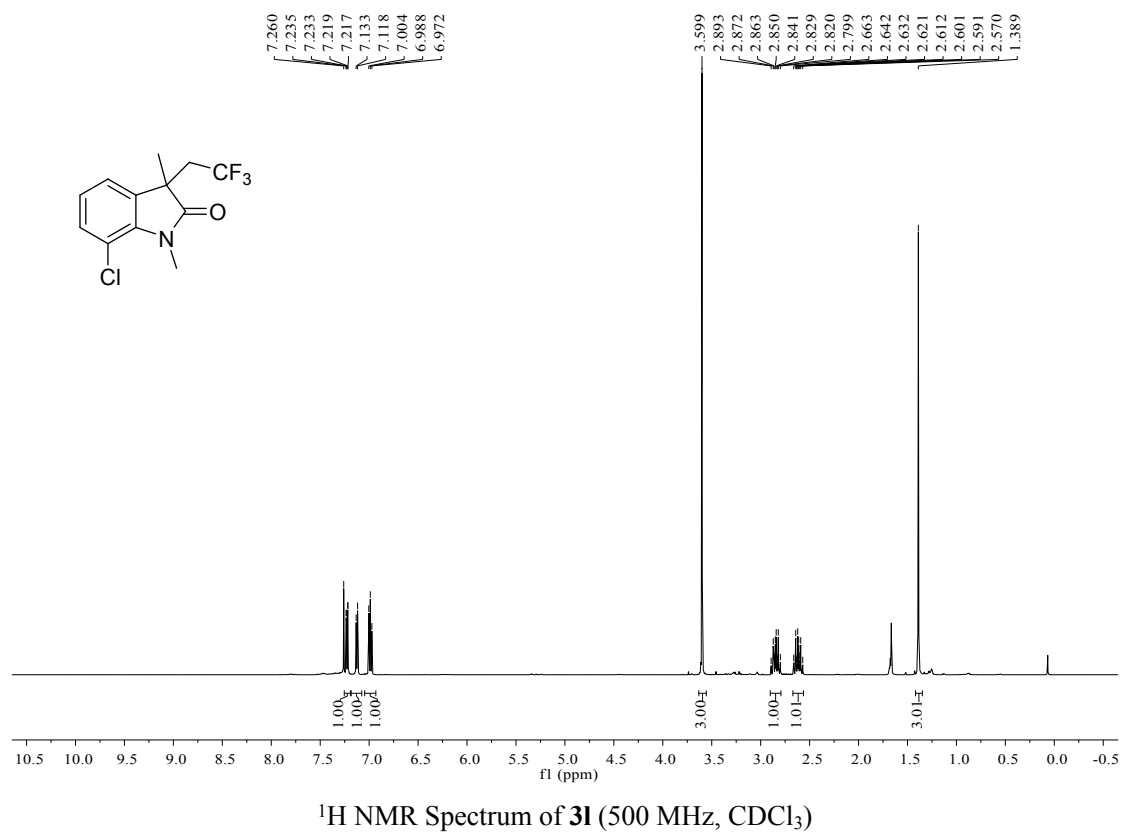

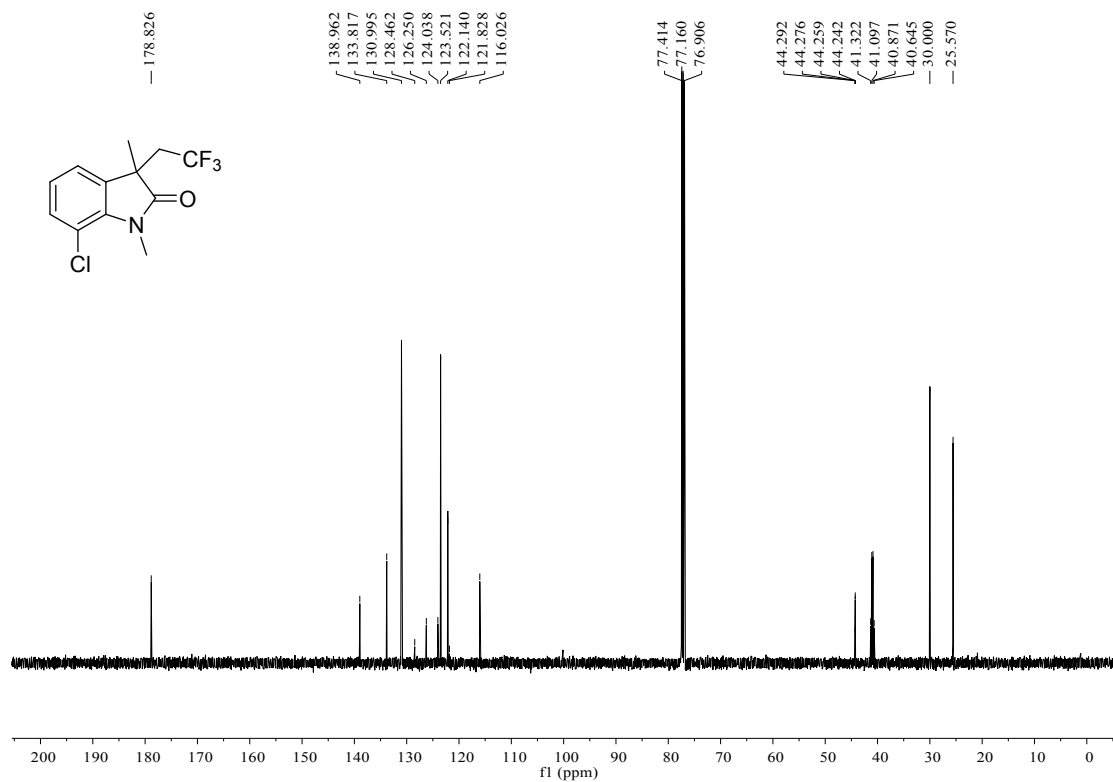

<sup>13</sup>C NMR Spectrum of **3I** (126 MHz, CDCl<sub>3</sub>)

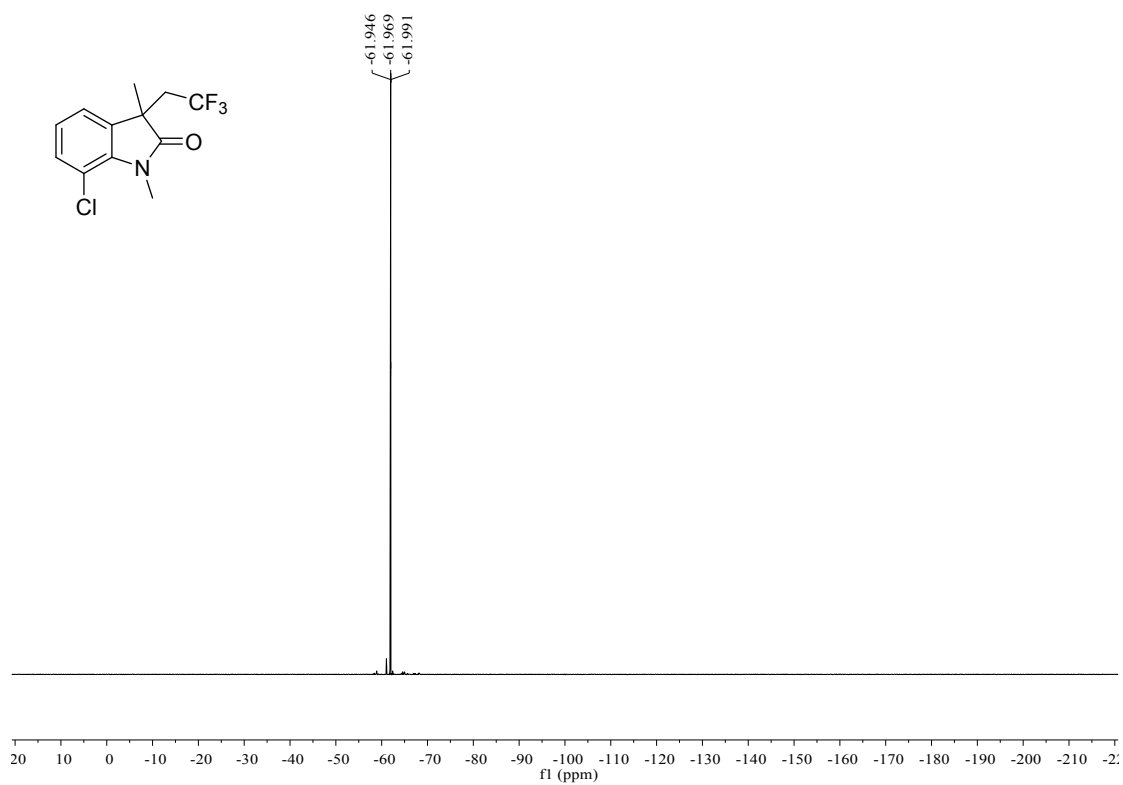

<sup>19</sup>F NMR Spectrum of **3I** (470 MHz, CDCl<sub>3</sub>)



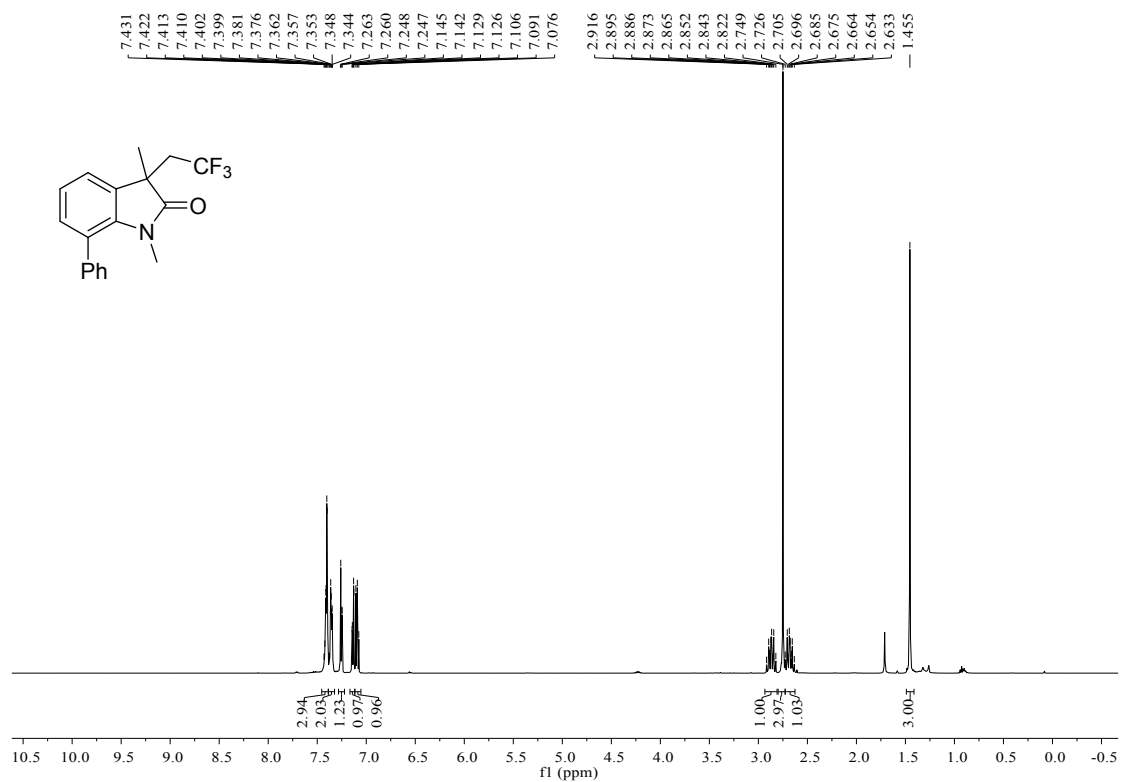

**<sup>1</sup>H NMR Spectrum of **3m** (500 MHz, CDCl<sub>3</sub>)**

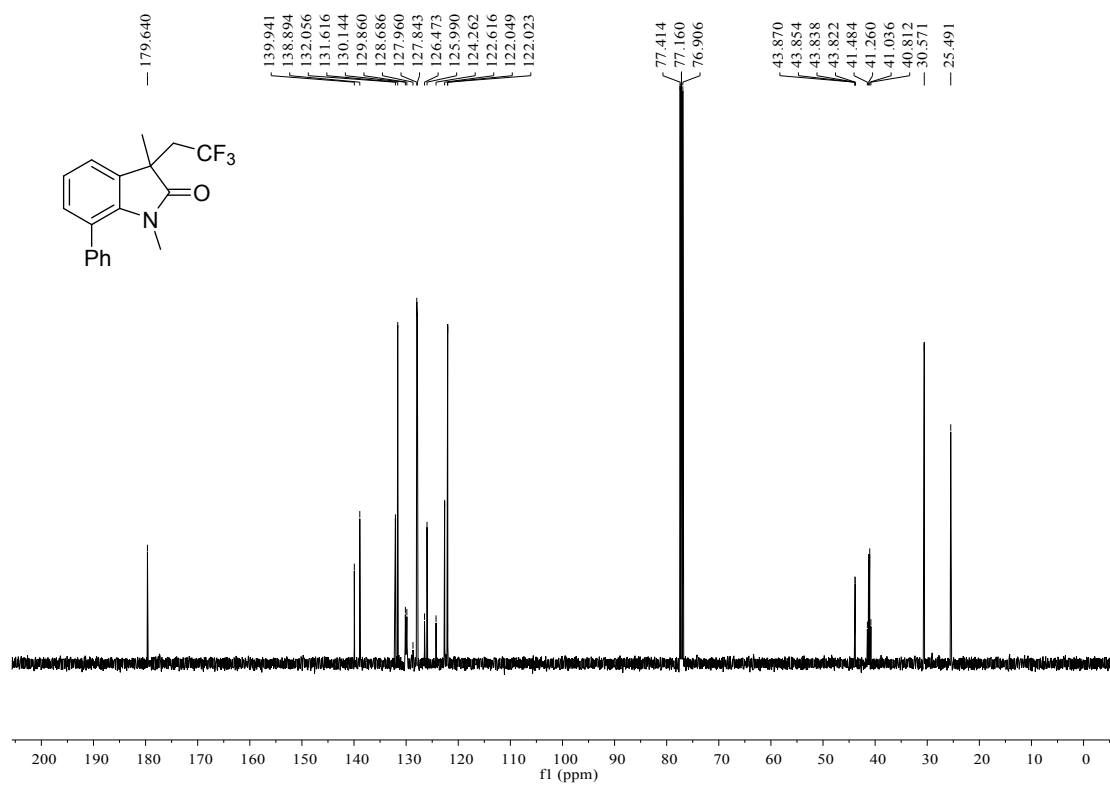

**<sup>13</sup>C NMR Spectrum of **3m** (126 MHz, CDCl<sub>3</sub>)**

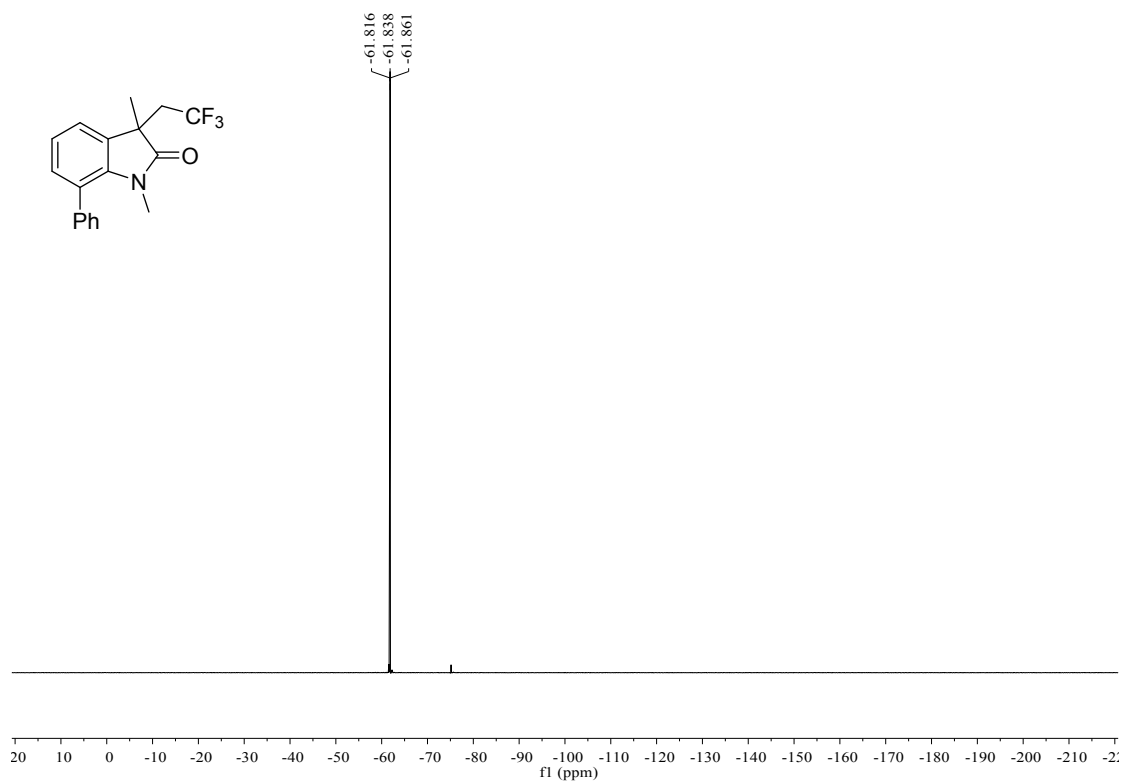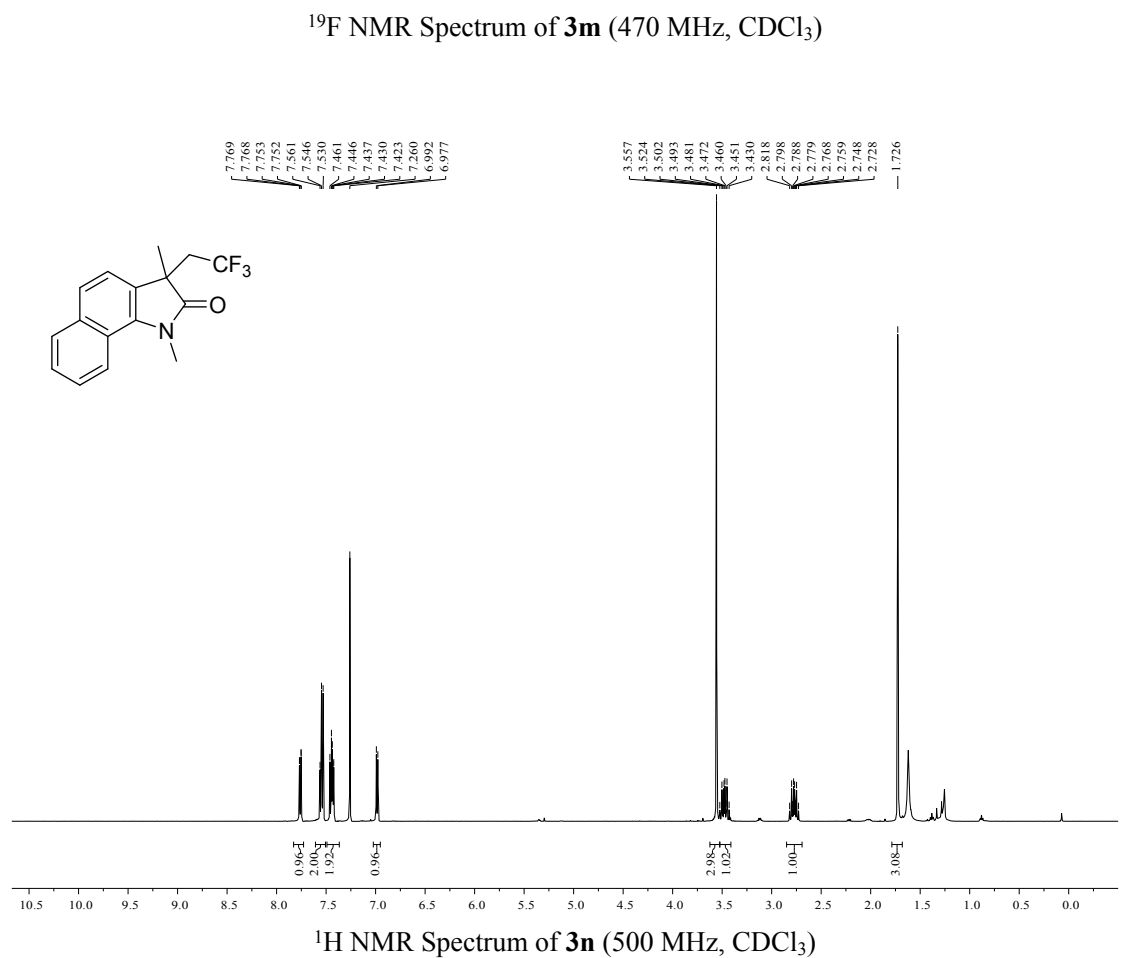

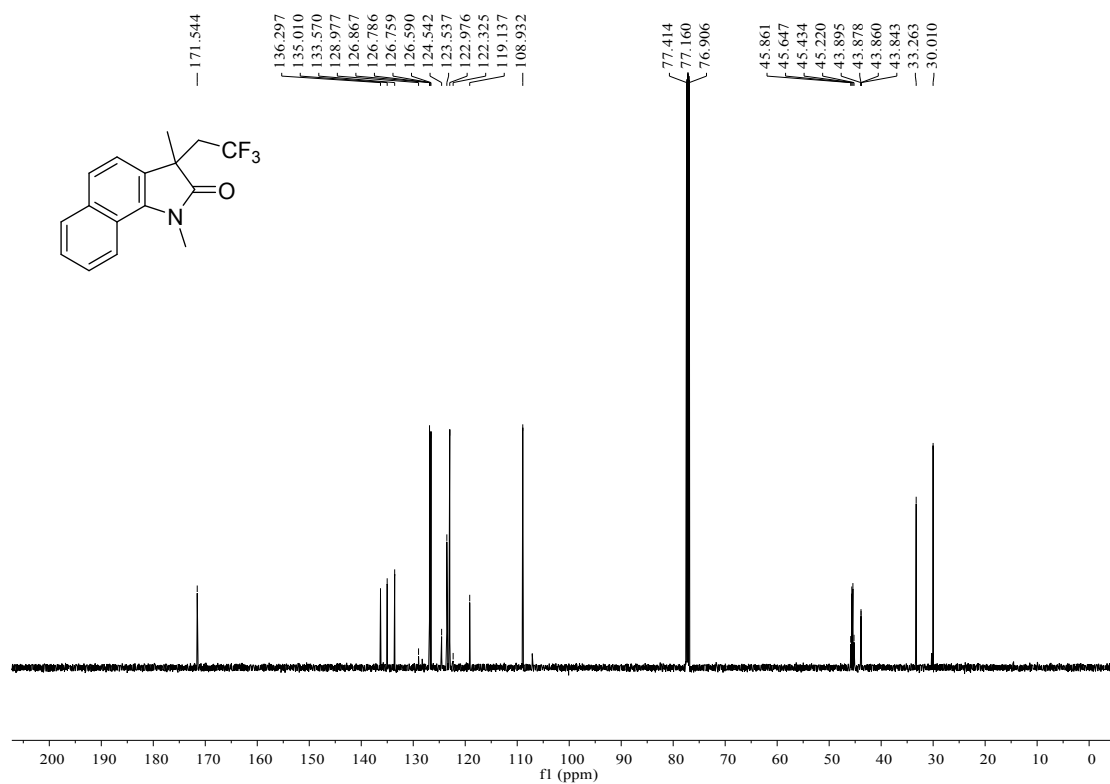

<sup>13</sup>C NMR Spectrum of **3n** (126 MHz, CDCl<sub>3</sub>)

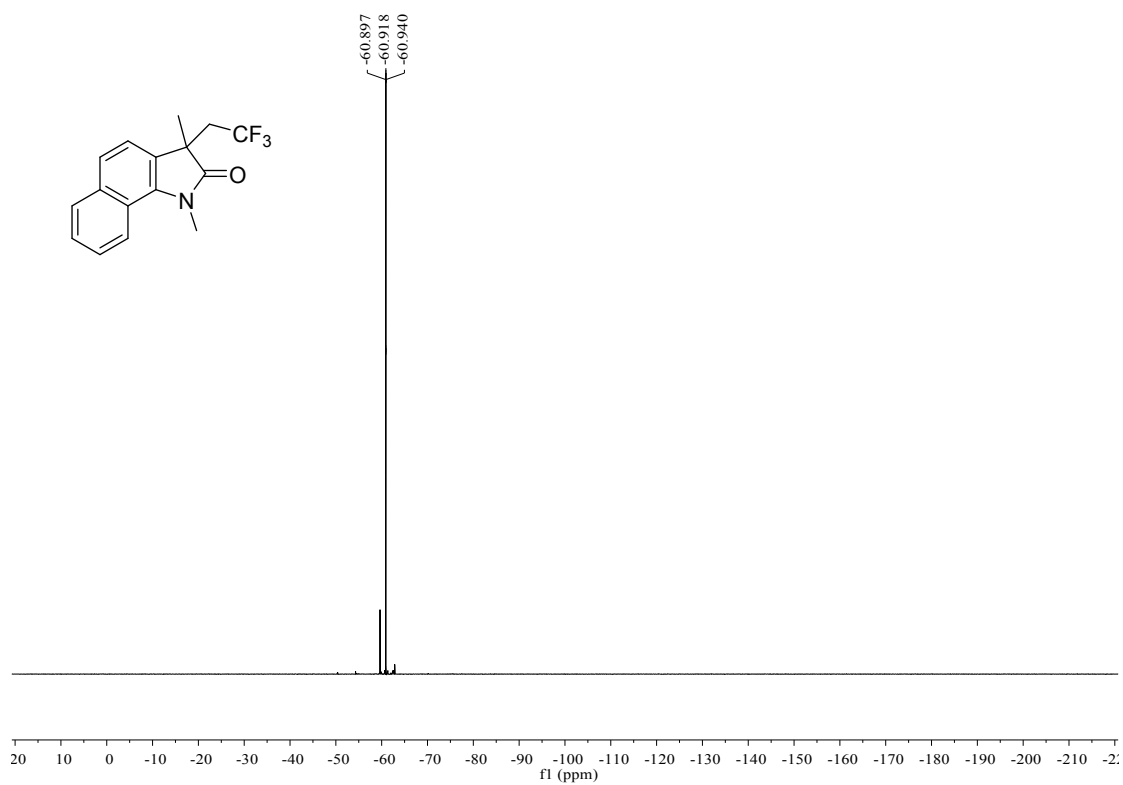

<sup>19</sup>F NMR Spectrum of **3n** (470 MHz, CDCl<sub>3</sub>)

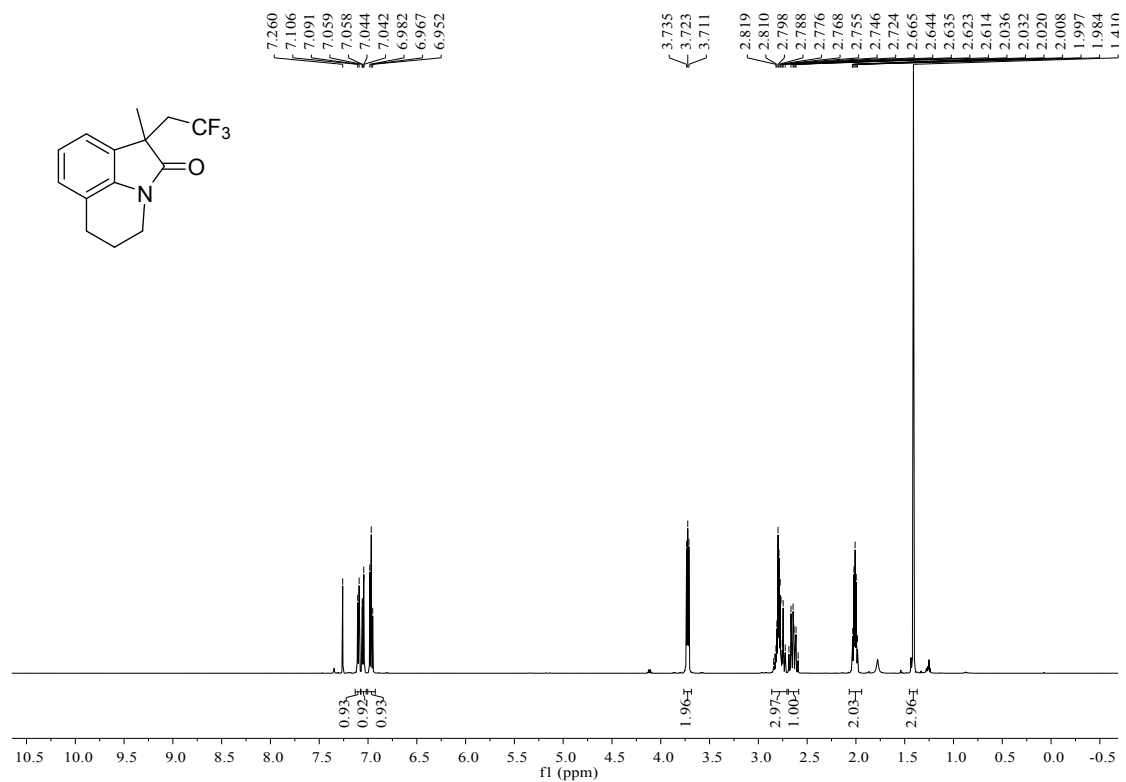

**<sup>1</sup>H NMR Spectrum of **3o** (500 MHz, CDCl<sub>3</sub>)**

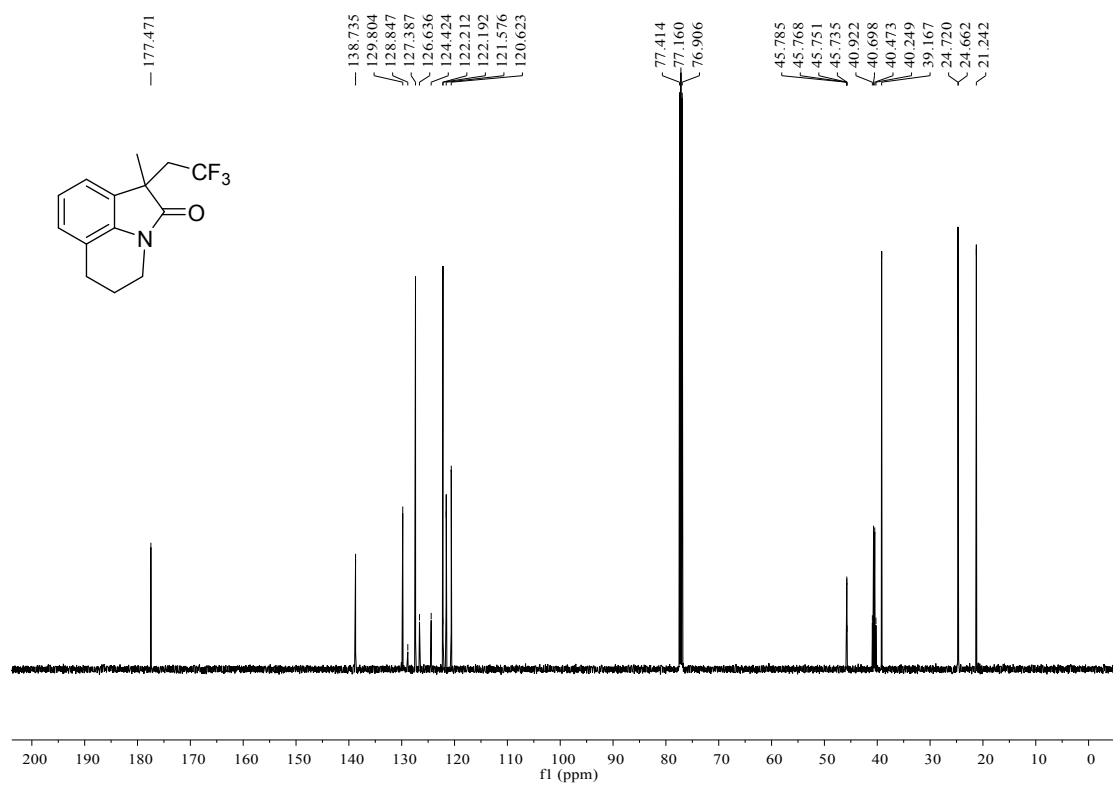

**<sup>13</sup>C NMR Spectrum of **3o** (126 MHz, CDCl<sub>3</sub>)**

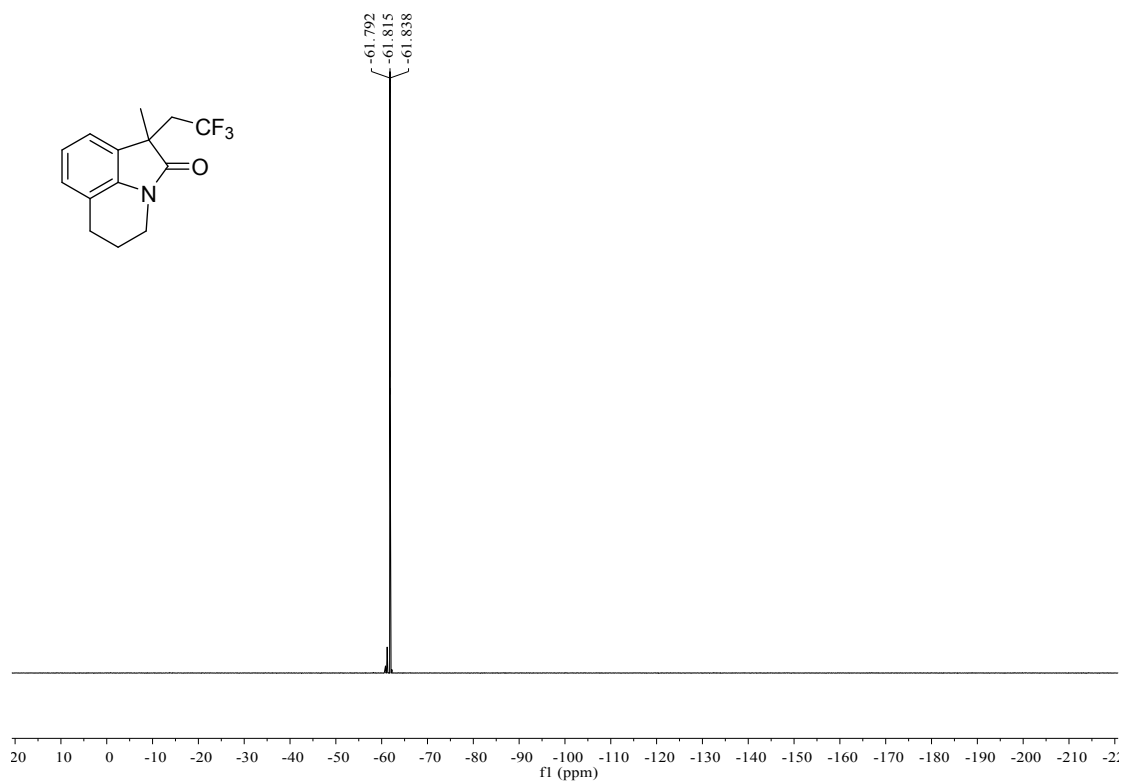

$^{19}\text{F}$  NMR Spectrum of **3o** (470 MHz,  $\text{CDCl}_3$ )

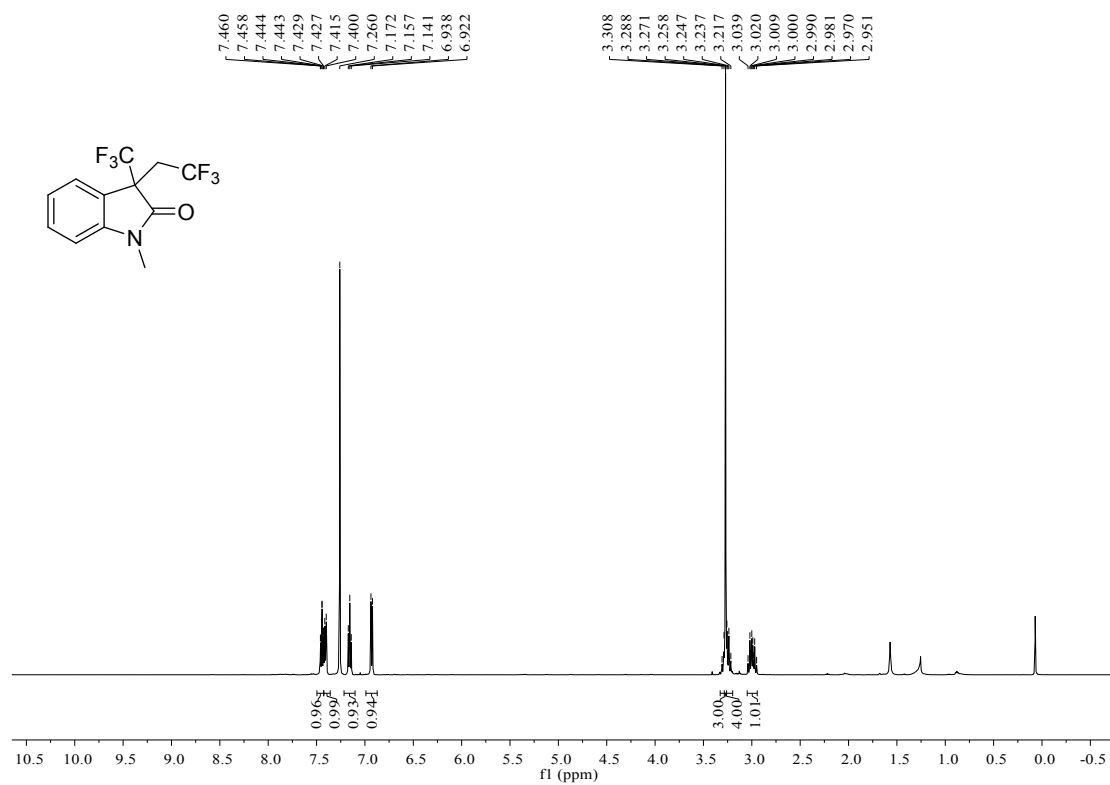

$^1\text{H}$  NMR Spectrum of **3p** (500 MHz,  $\text{CDCl}_3$ )

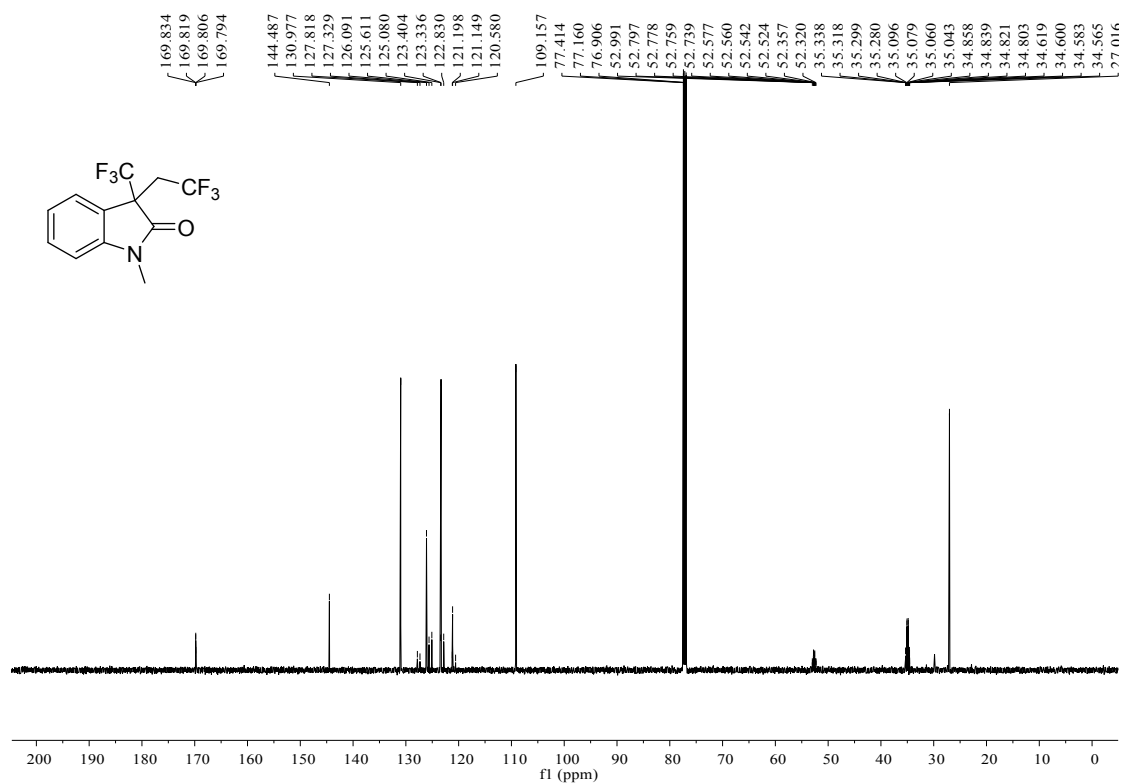

<sup>13</sup>C NMR Spectrum of **3p** (126 MHz, CDCl<sub>3</sub>)

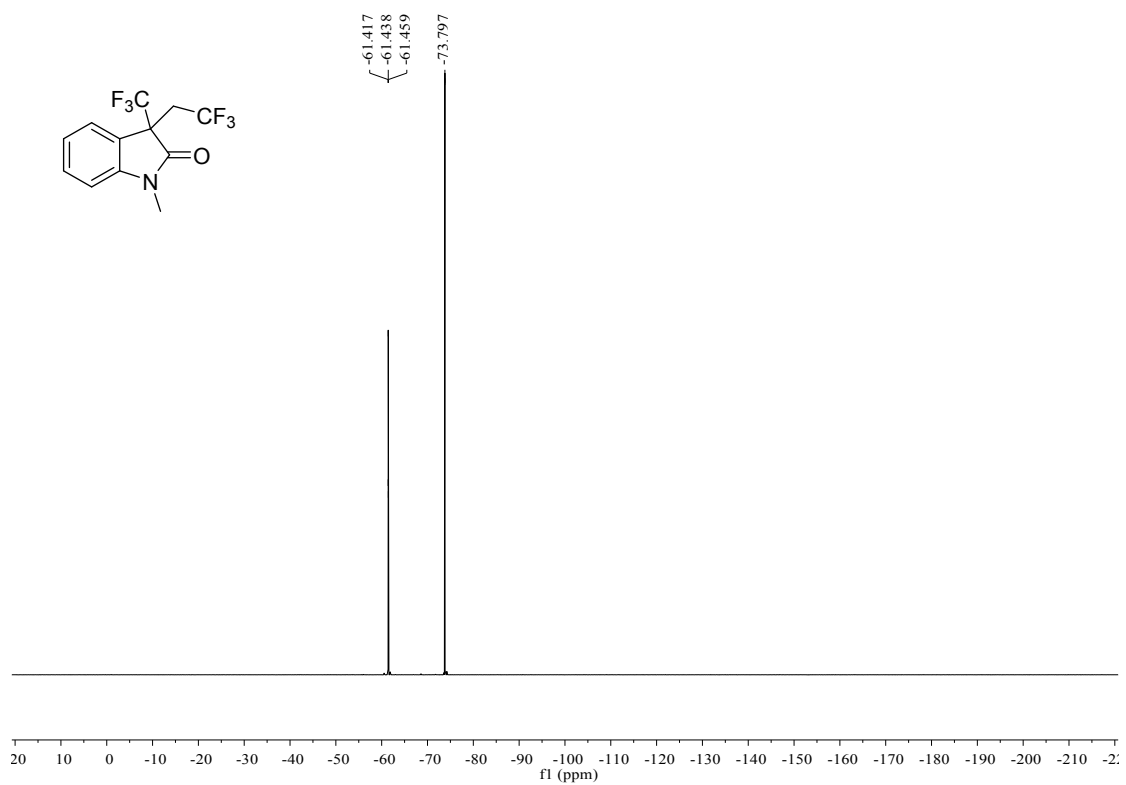

<sup>19</sup>F NMR Spectrum of **3p** (470 MHz, CDCl<sub>3</sub>)

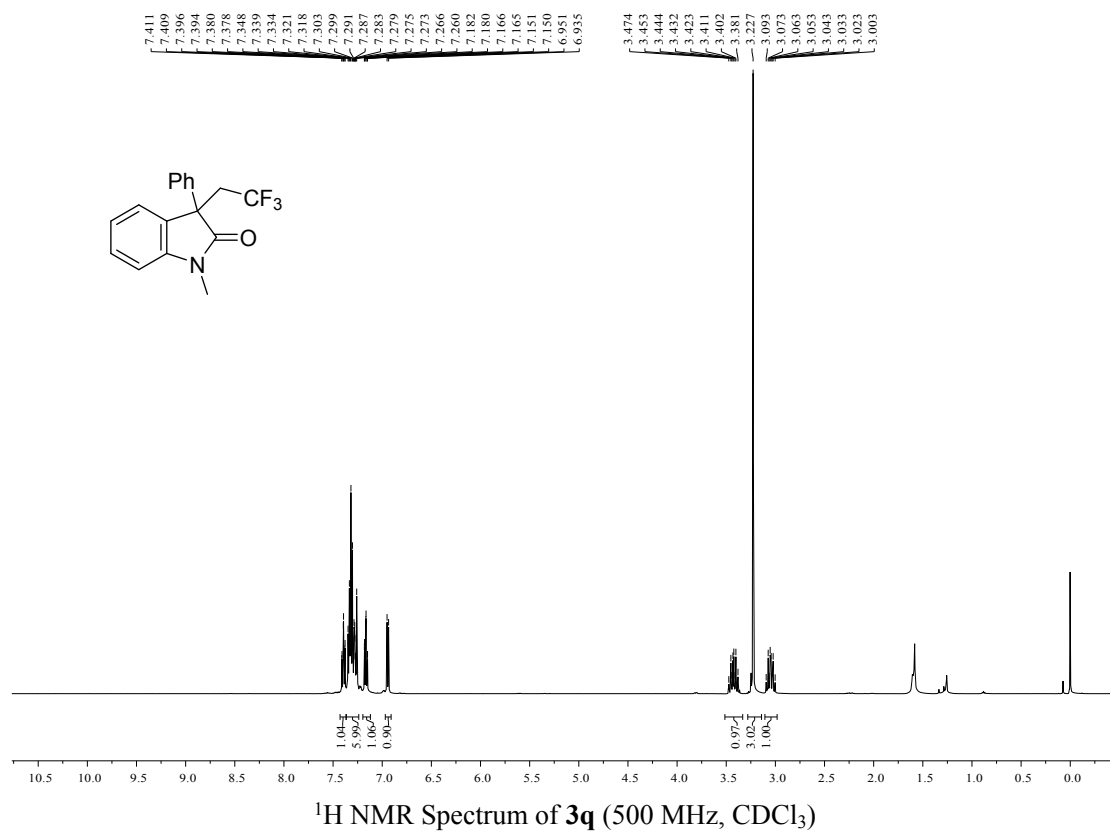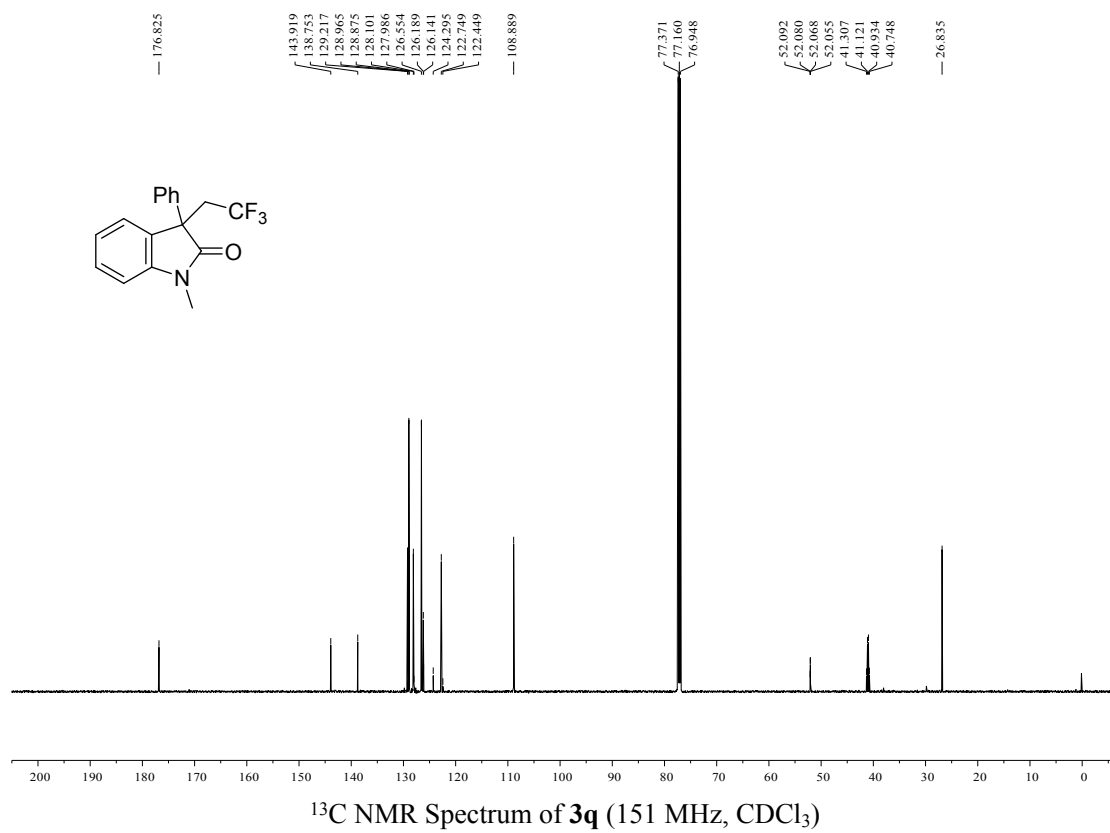

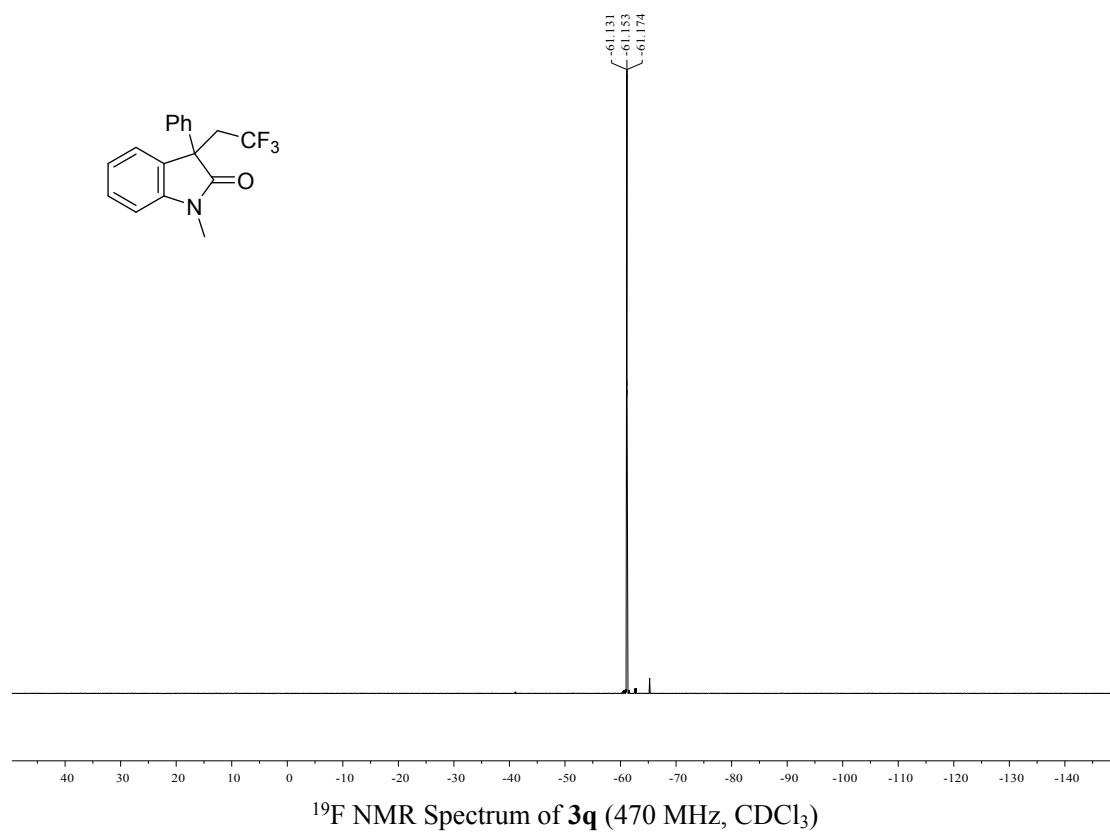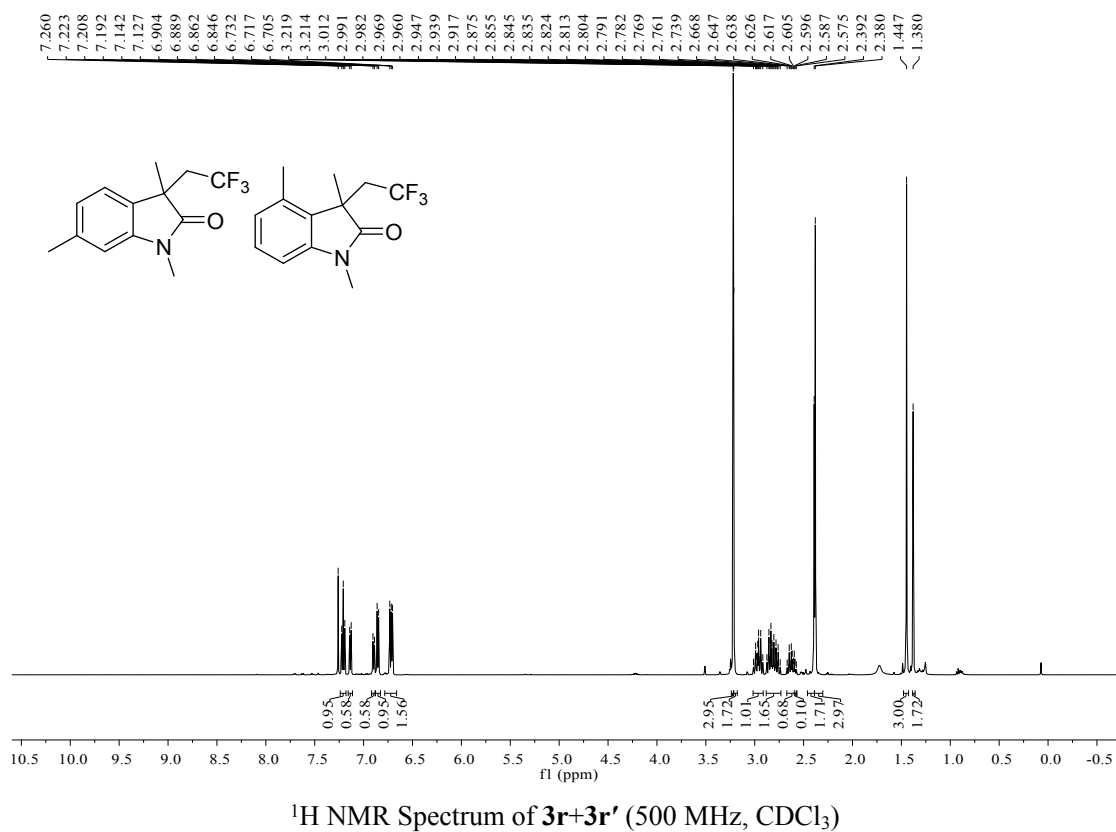



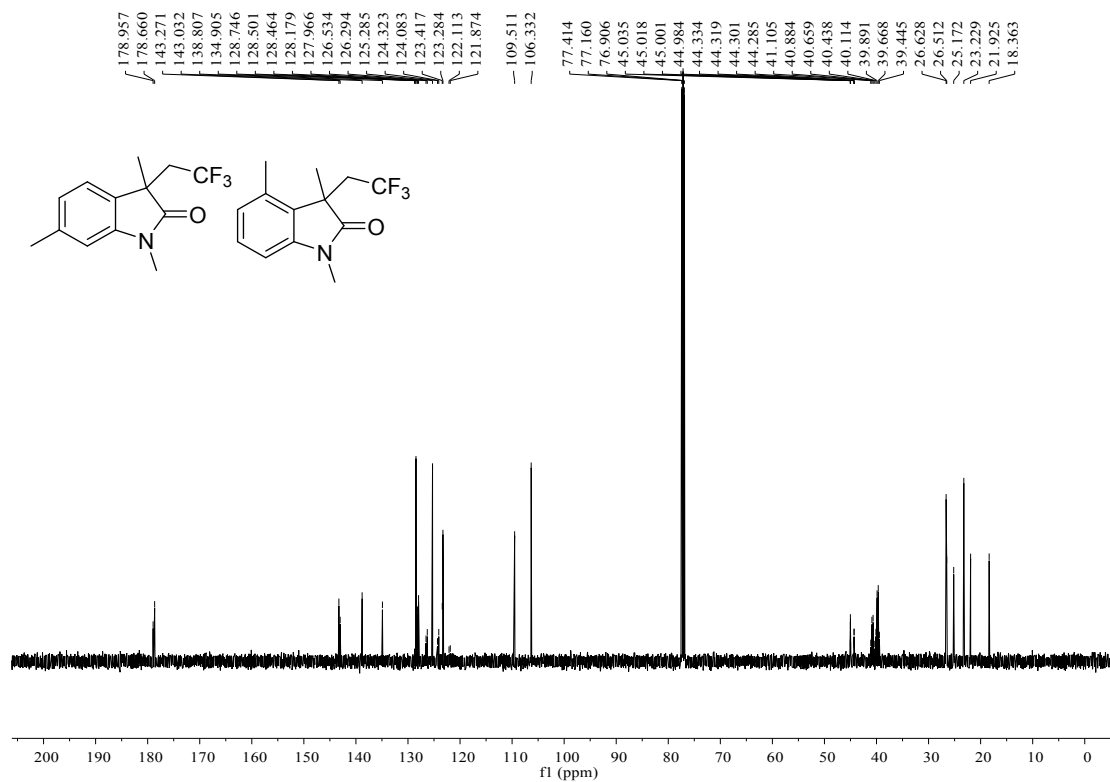

<sup>13</sup>C NMR Spectrum of **3r+3r'** (126 MHz, CDCl<sub>3</sub>)

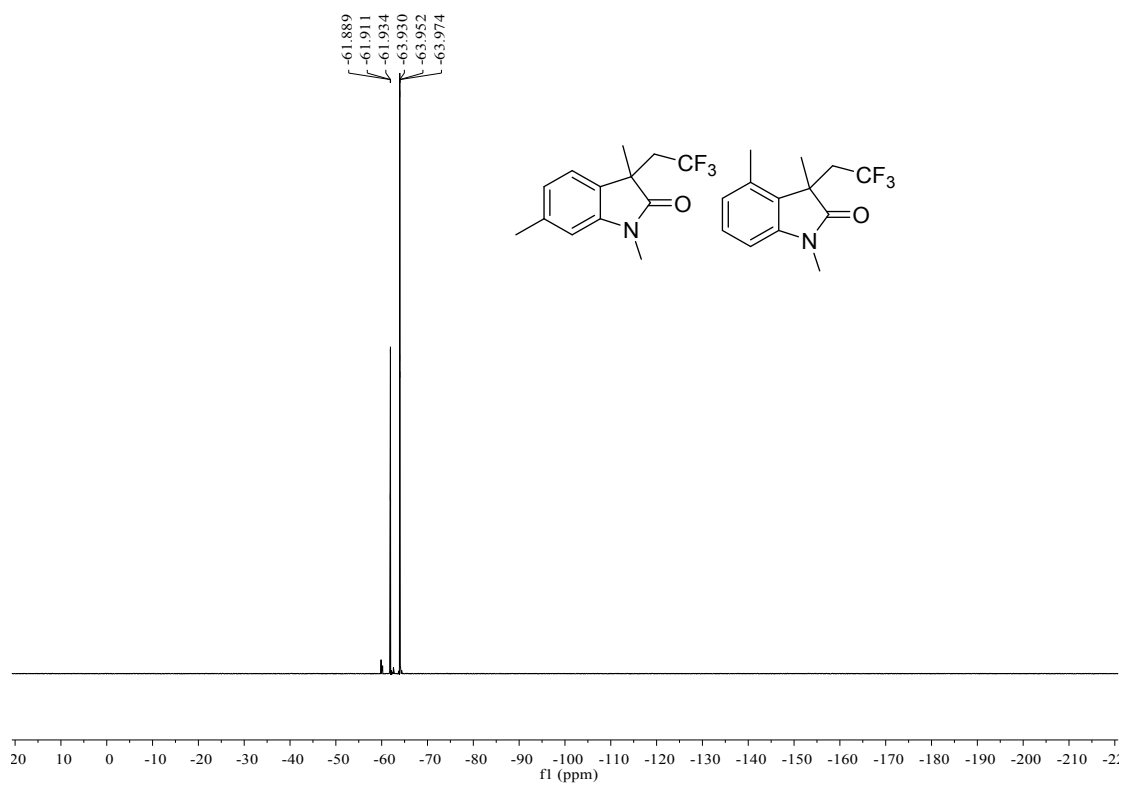

<sup>19</sup>F NMR Spectrum of **3r+3r'** (470 MHz, CDCl<sub>3</sub>)

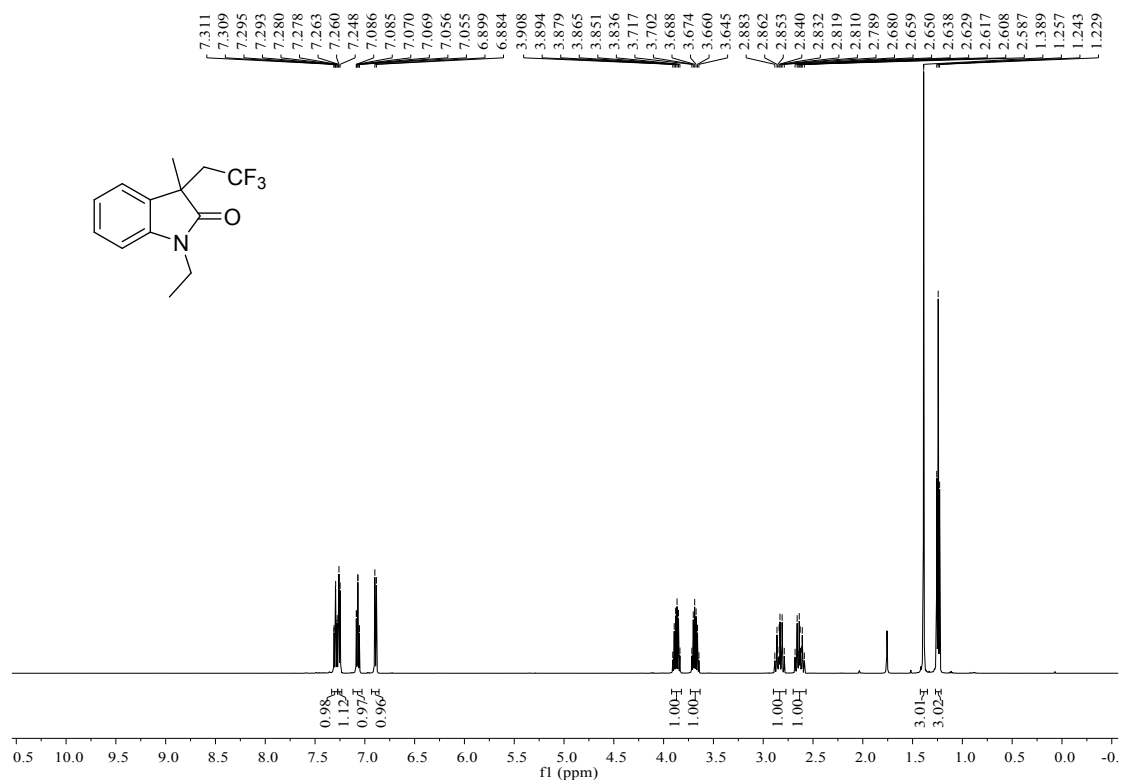

**<sup>1</sup>H NMR Spectrum of 3s (500 MHz, CDCl<sub>3</sub>)**

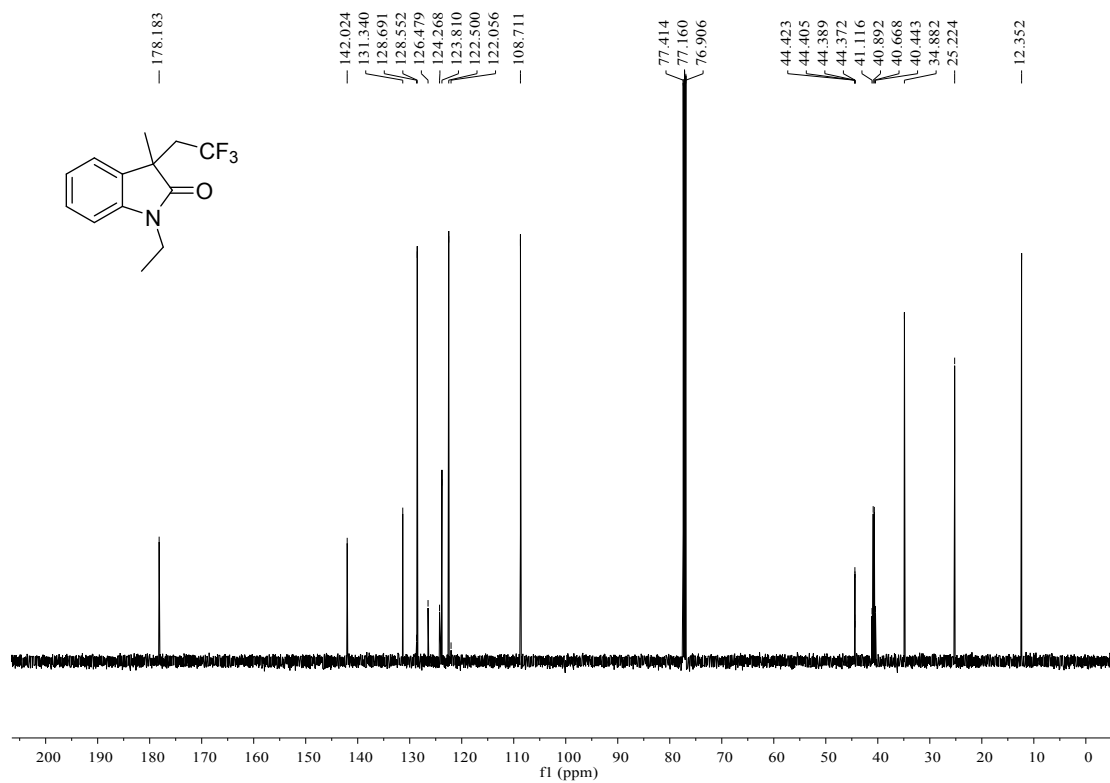

**<sup>13</sup>C NMR Spectrum of 3s (126 MHz, CDCl<sub>3</sub>)**

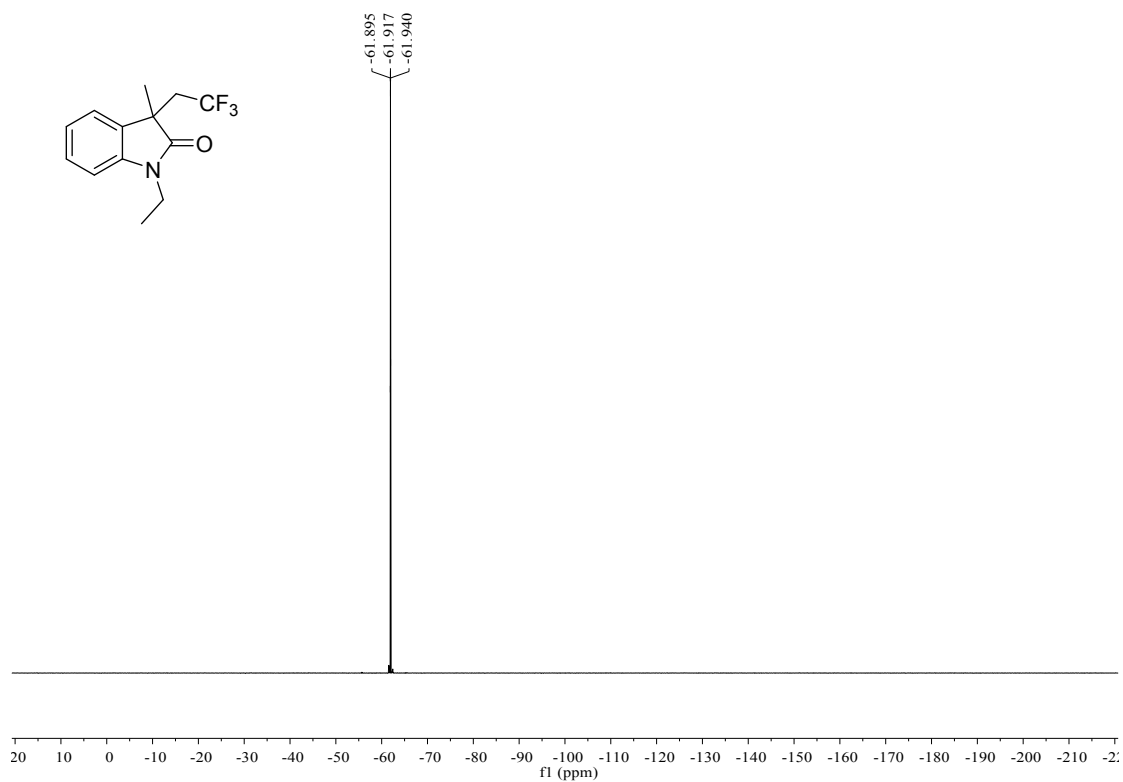

**<sup>19</sup>F NMR Spectrum of 3s (470 MHz, CDCl<sub>3</sub>)**

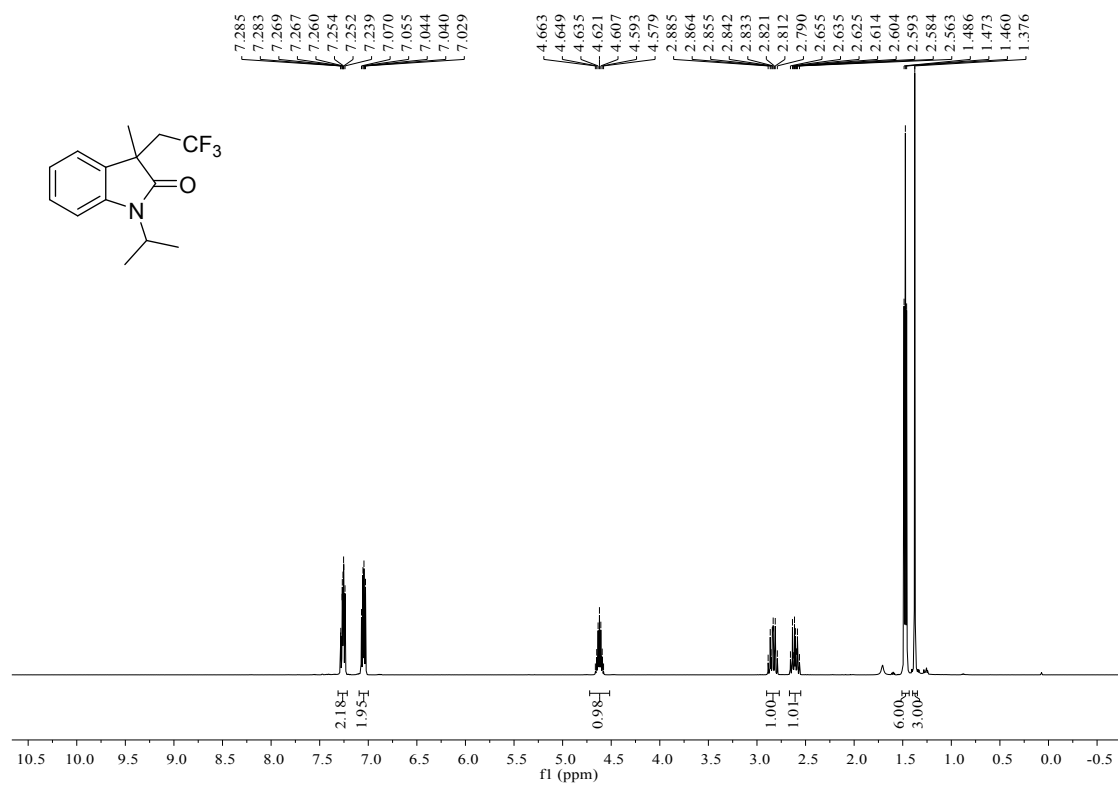

**<sup>1</sup>H NMR Spectrum of 3t (500 MHz, CDCl<sub>3</sub>)**

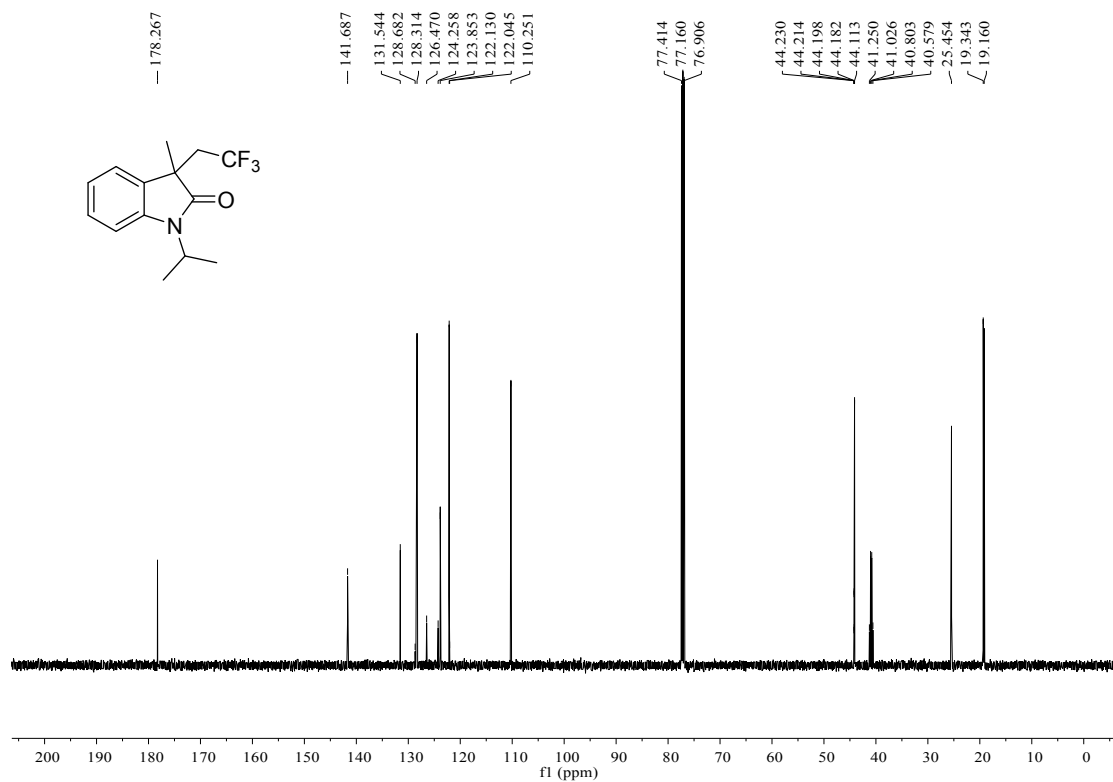

<sup>13</sup>C NMR Spectrum of **3t** (126 MHz, CDCl<sub>3</sub>)

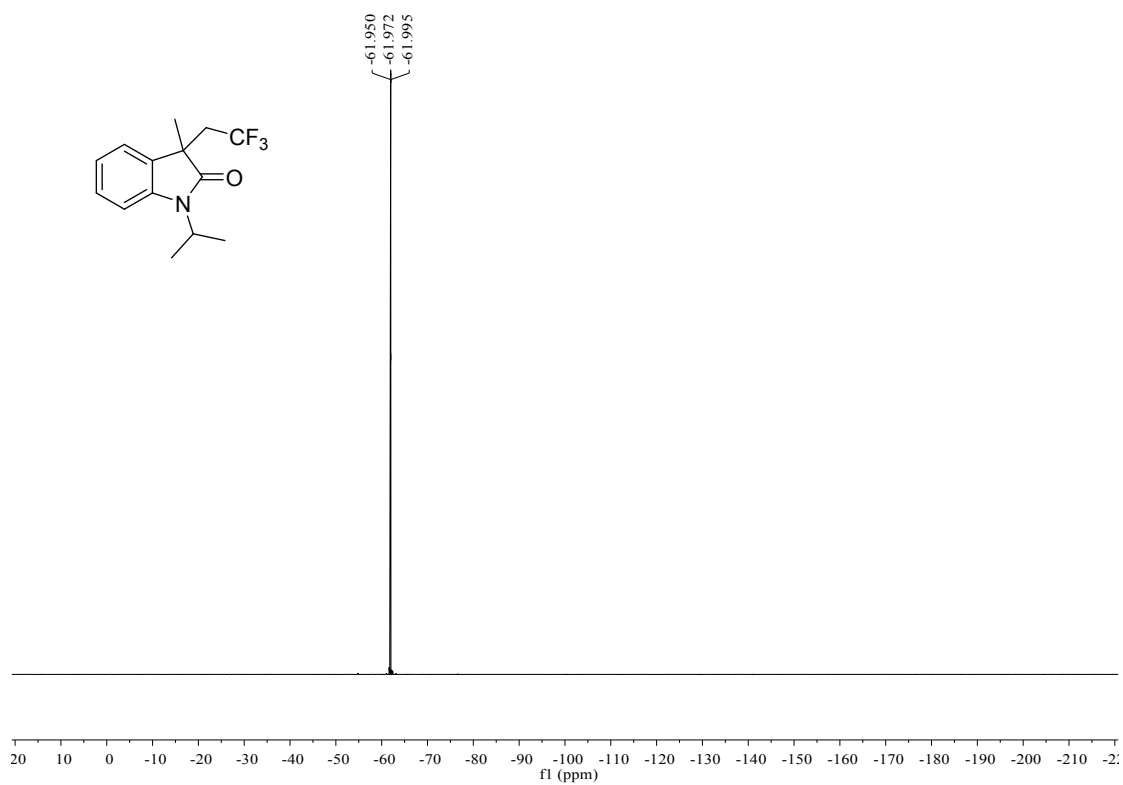

<sup>19</sup>F NMR Spectrum of **3t** (470 MHz, CDCl<sub>3</sub>)

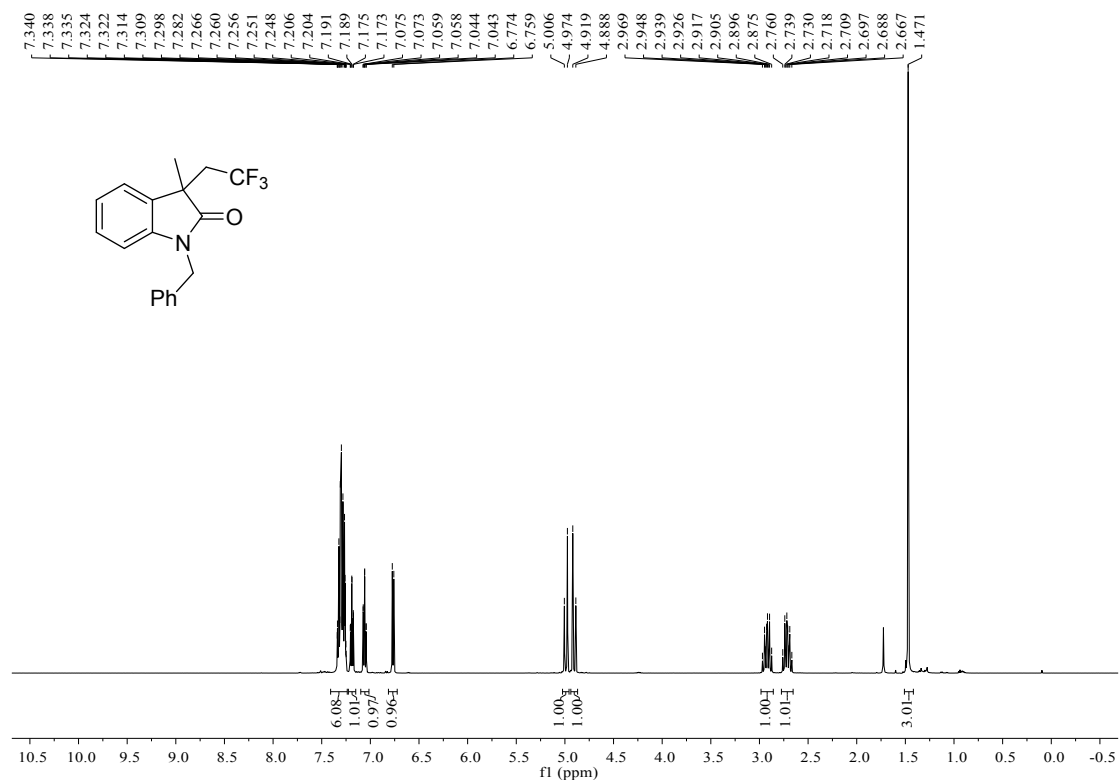

**<sup>1</sup>H NMR Spectrum of **3u** (500 MHz, CDCl<sub>3</sub>)**

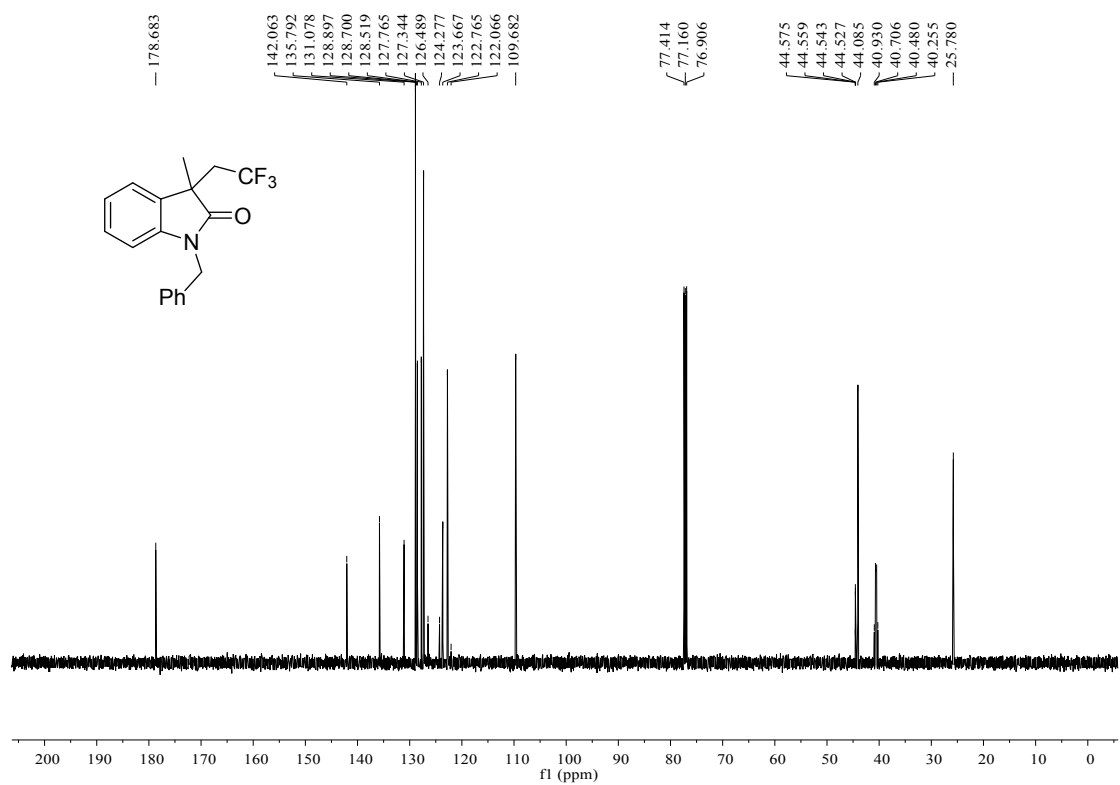

**<sup>13</sup>C NMR Spectrum of **3u** (126 MHz, CDCl<sub>3</sub>)**

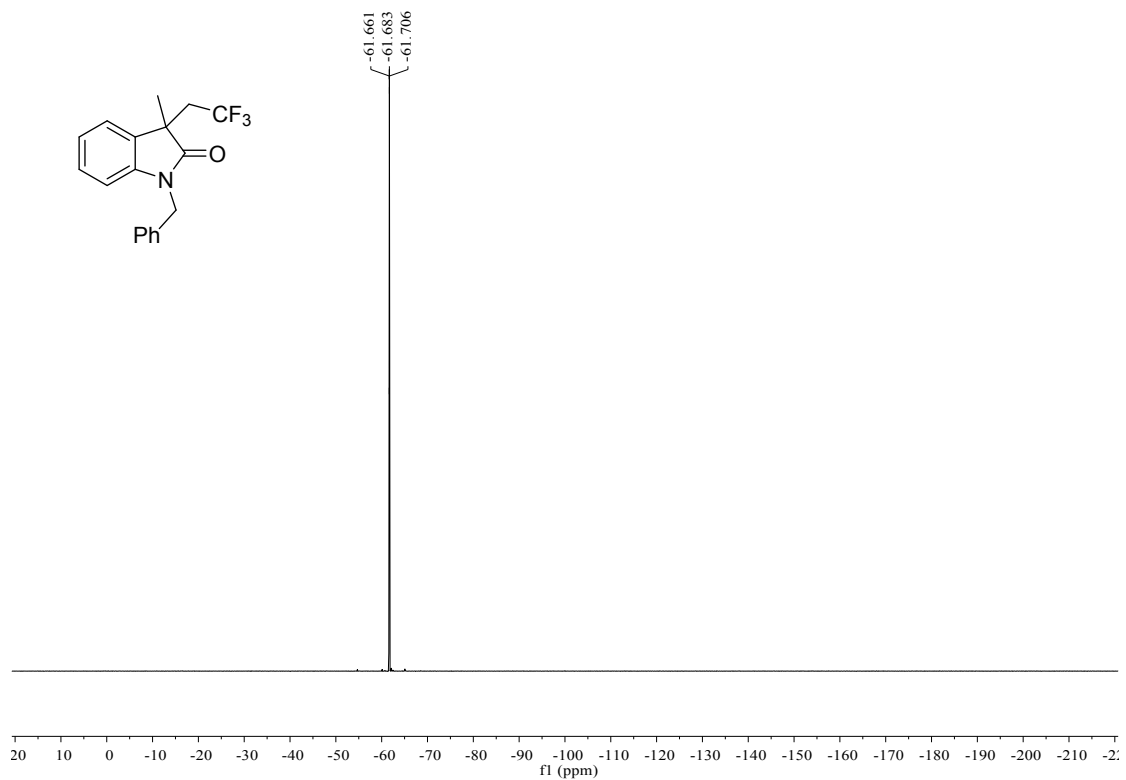

$^{19}\text{F}$  NMR Spectrum of **3u** (470 MHz,  $\text{CDCl}_3$ )

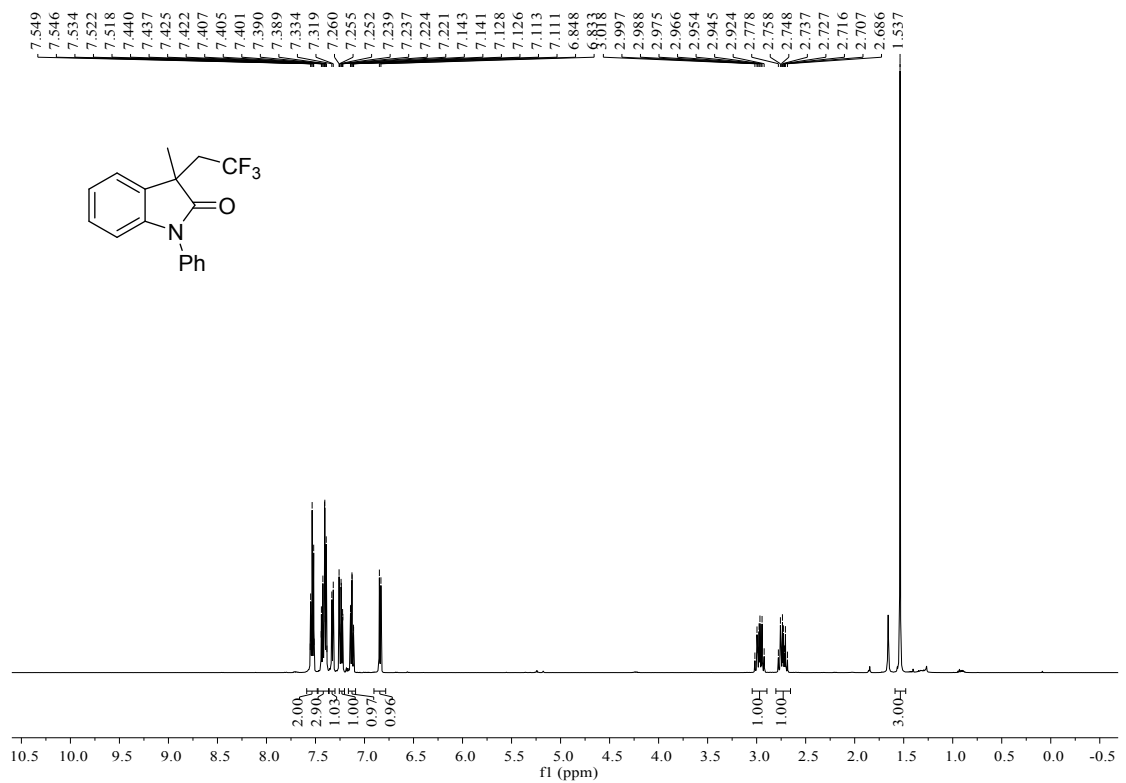

$^1\text{H}$  NMR Spectrum of **3v** (500 MHz,  $\text{CDCl}_3$ )

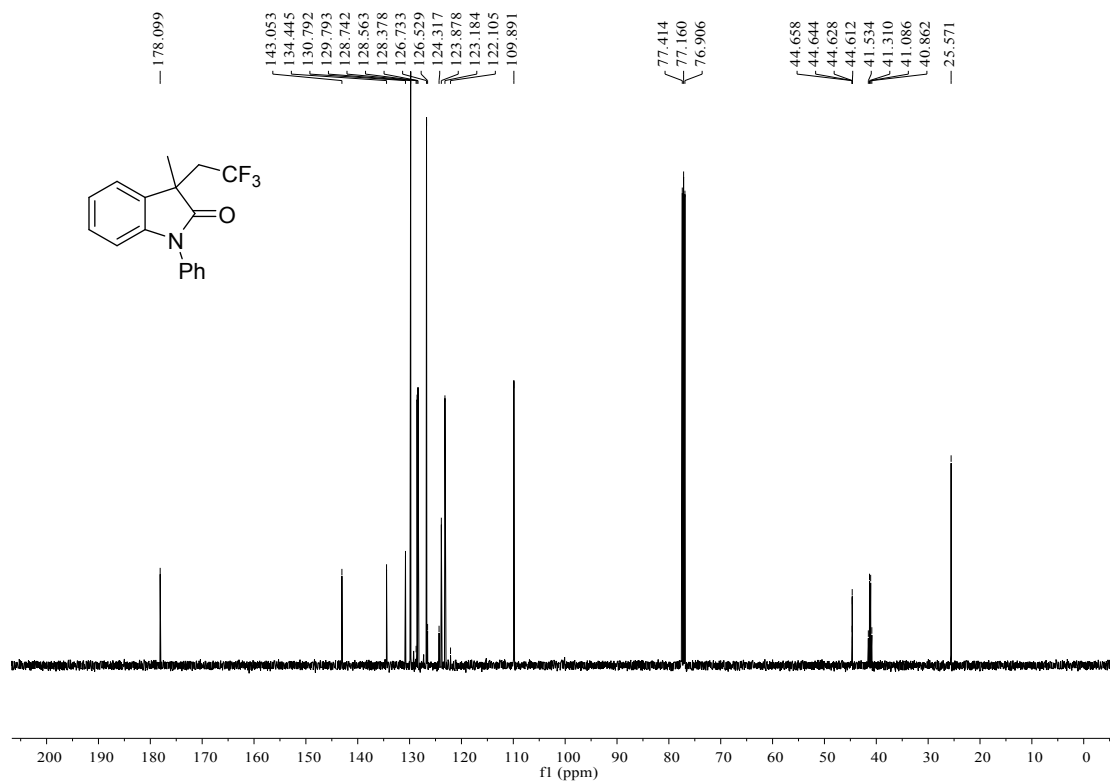

<sup>13</sup>C NMR Spectrum of 3v (126 MHz, CDCl<sub>3</sub>)

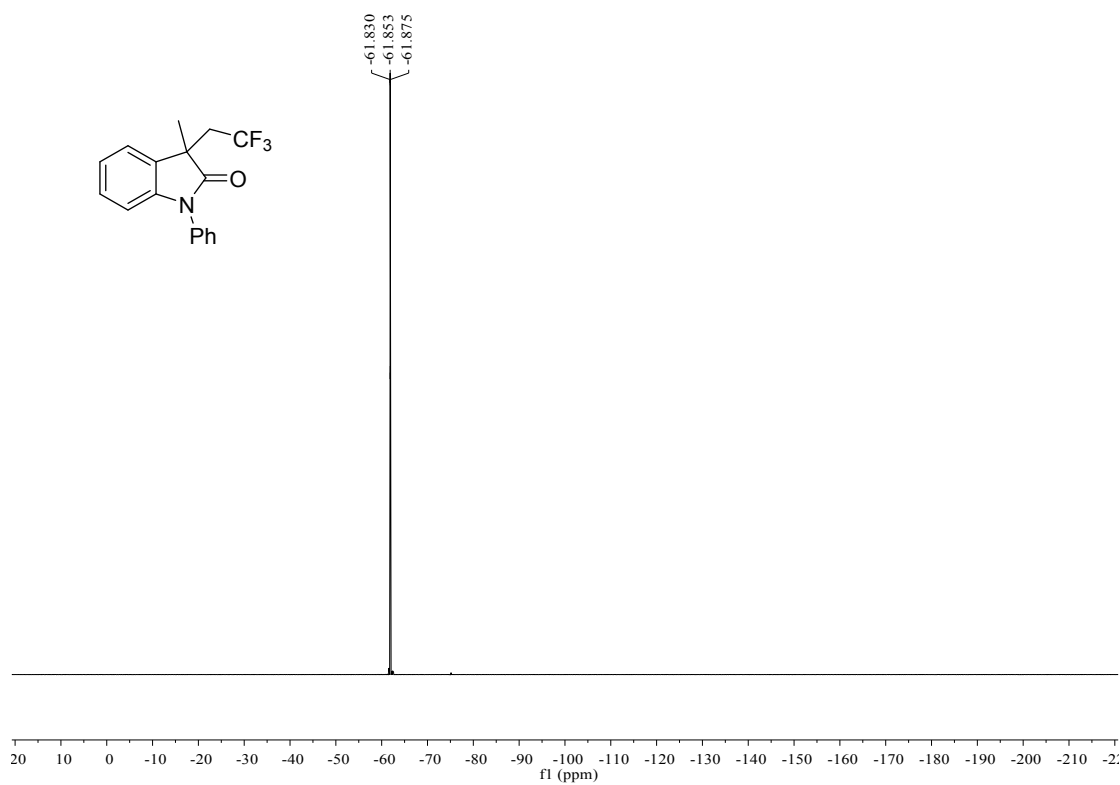

<sup>19</sup>F NMR Spectrum of 3v (470 MHz, CDCl<sub>3</sub>)

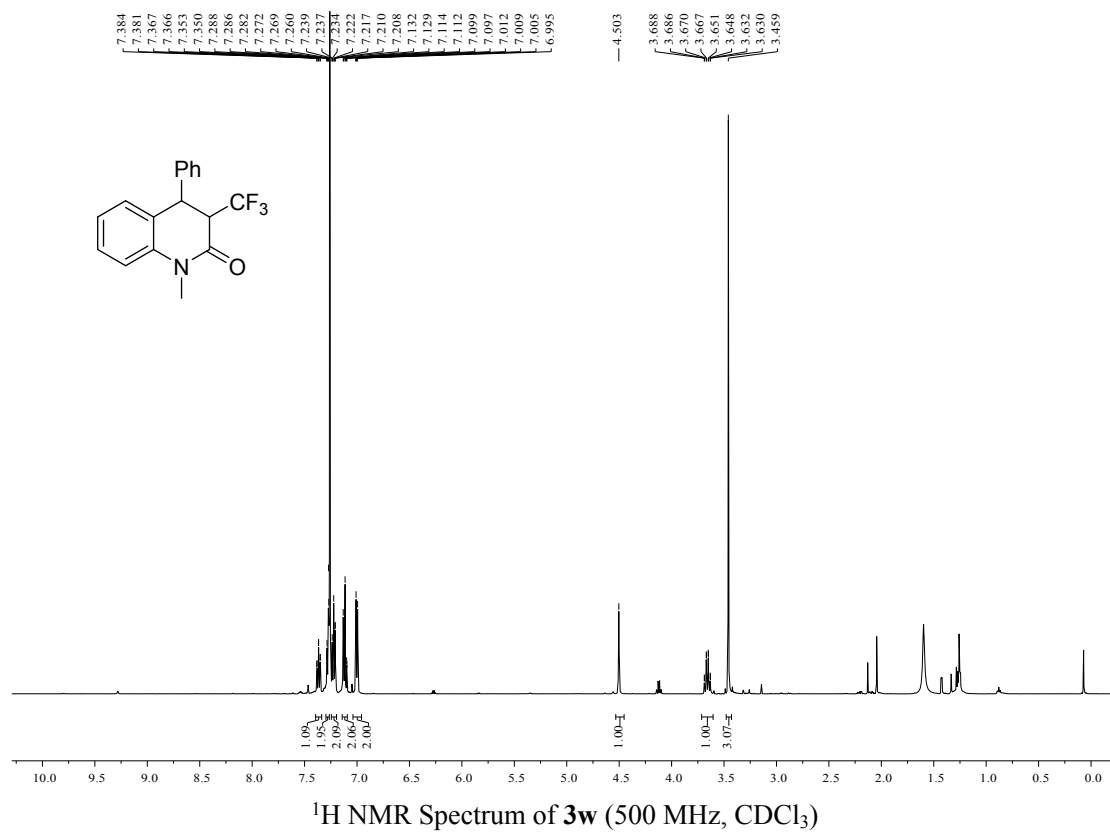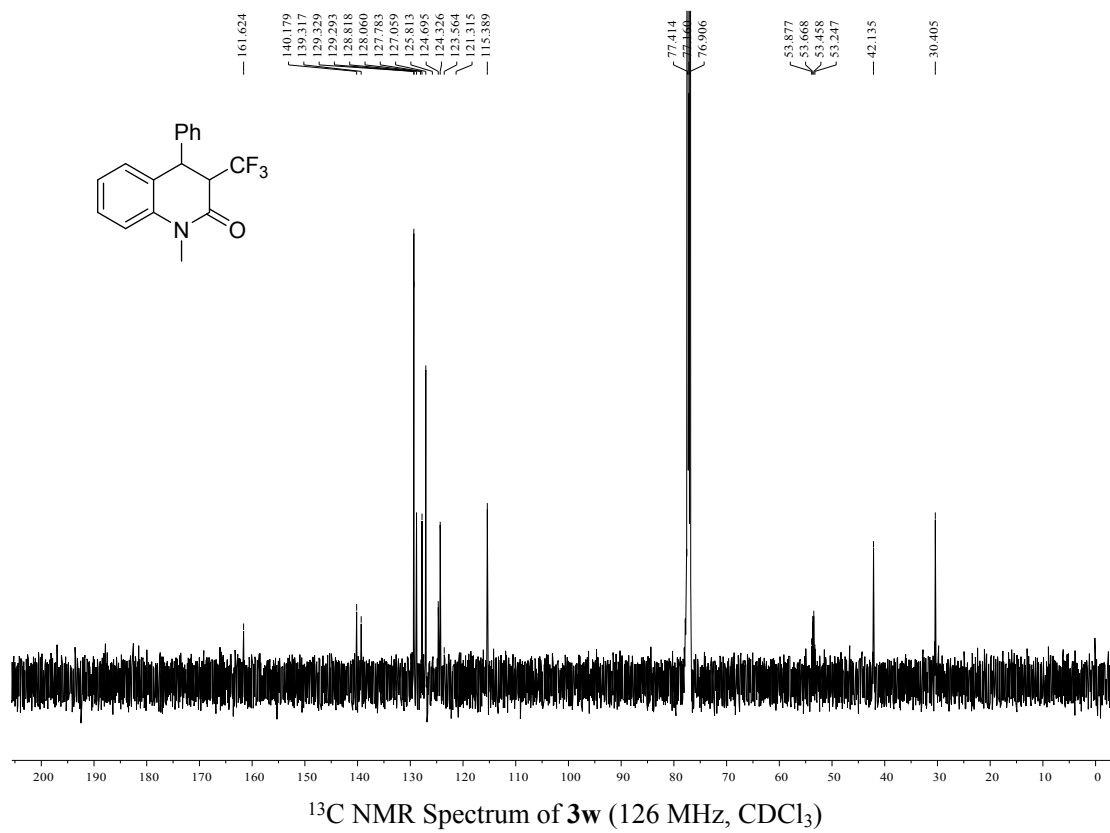



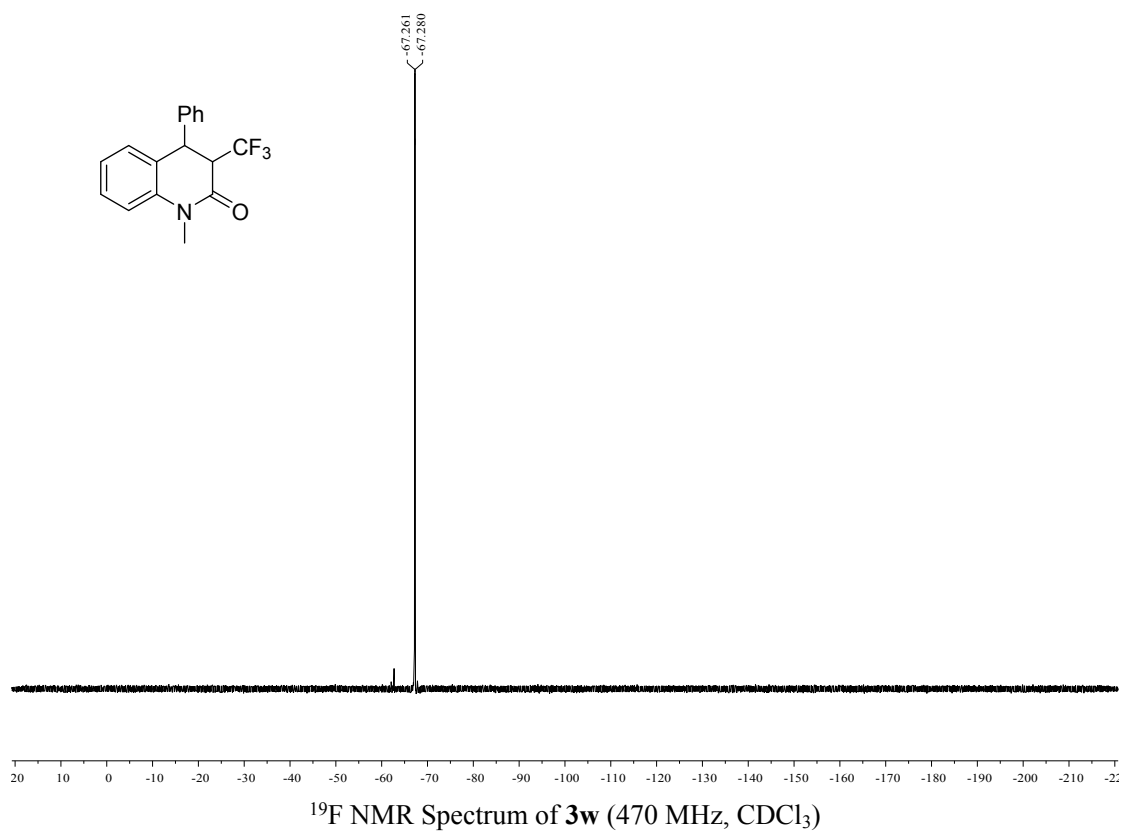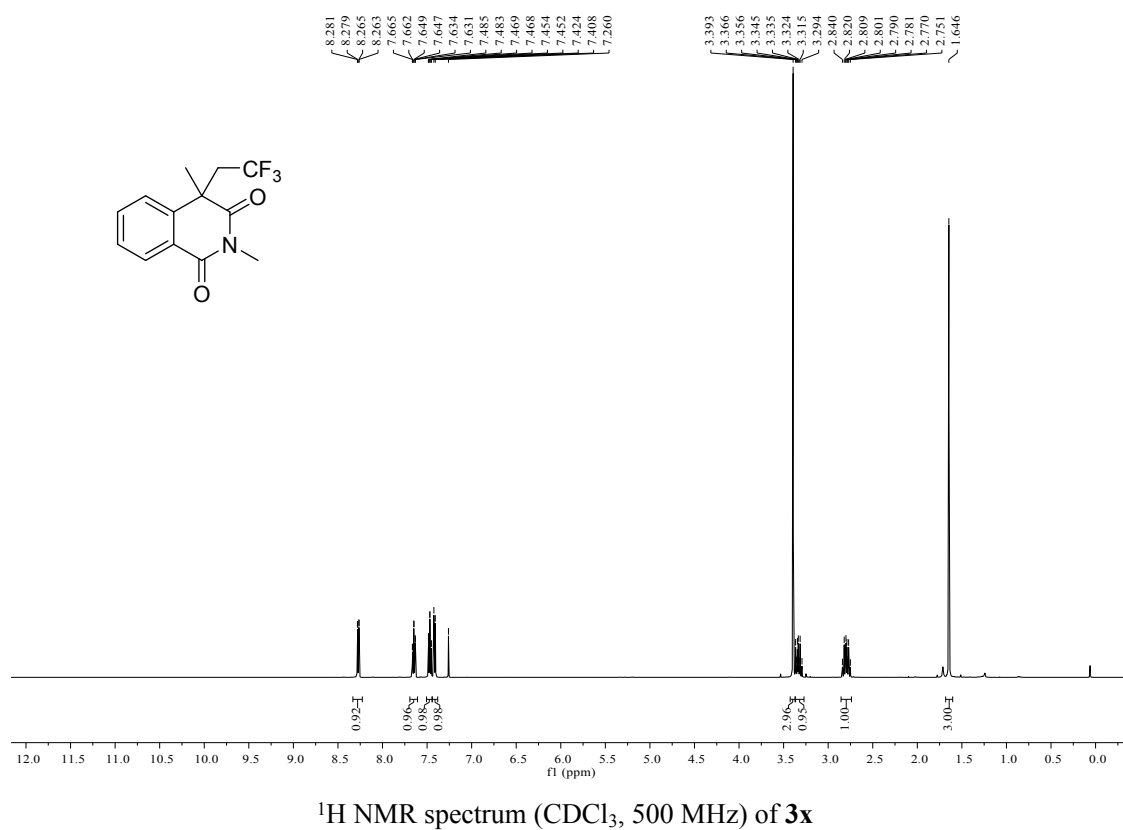

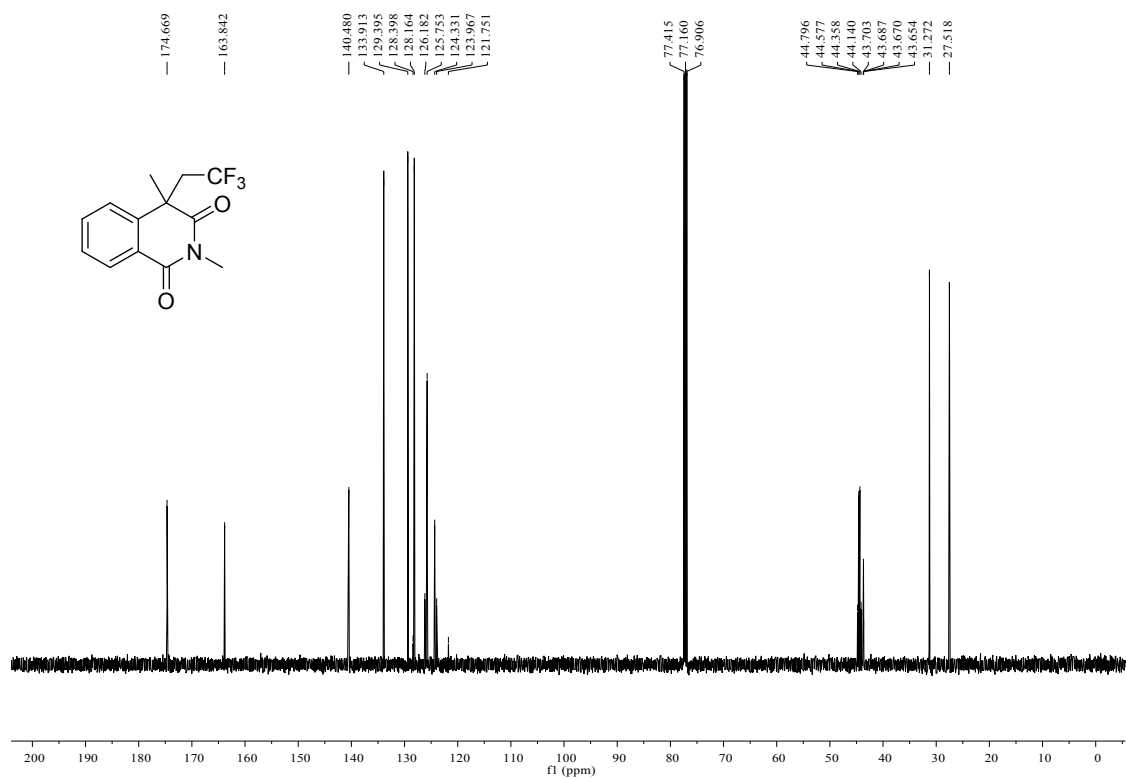

<sup>13</sup>C NMR spectrum (CDCl<sub>3</sub>, 126 MHz) of **3x**

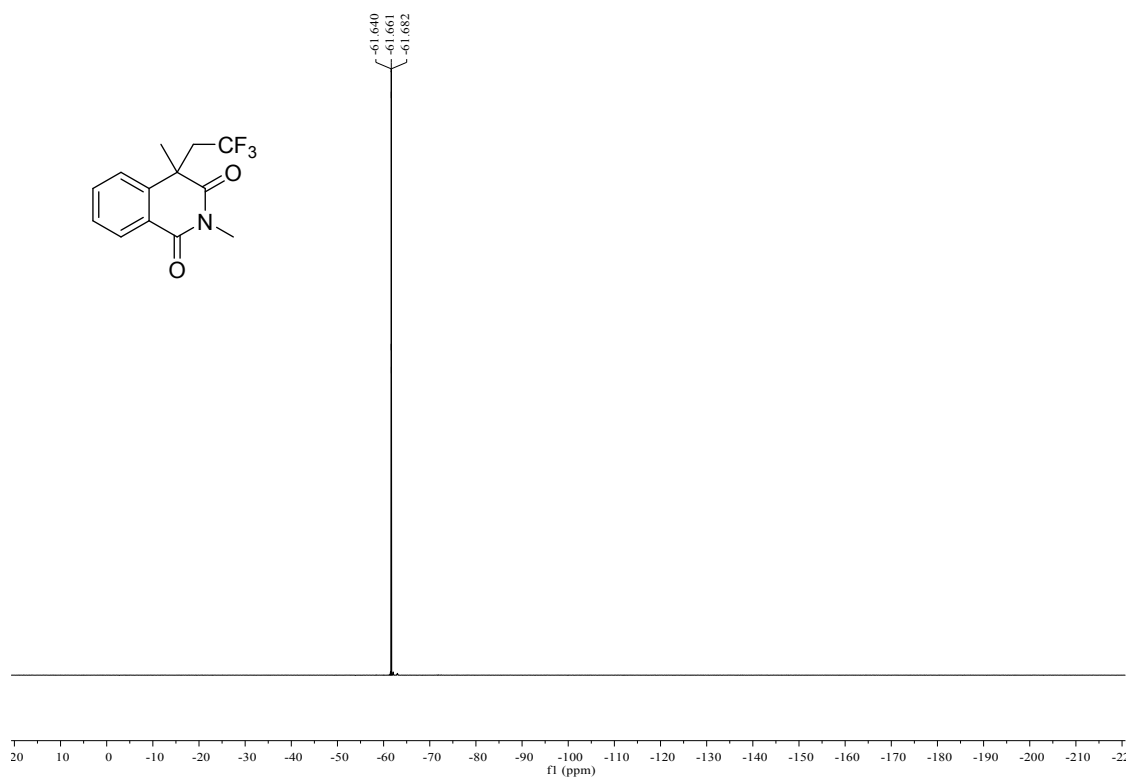

<sup>19</sup>F NMR spectrum (CDCl<sub>3</sub>, 470 MHz) of **3x**

## 6. References

- (S1) (a) T. Wu, X. Mu and G. Liu, *Angew. Chem., Int. Ed.*, 2011, **50**, 12578; (b) X. Mu, T. Wu, H. Y. Wang, Y. L. Guo and G. Liu, *J. Am. Chem. Soc.*, 2012, **134**, 878; (c) Y.-M. Li, X.-H. Wei, X.-A. Li and S.-D. Yang, *Chem. Commun.*, 2013, **49**, 11701; (d) Y.-M. Li, M. Sun, H.-L. Wang, Q.-P. Tian and S.-D. Yang, *Angew. Chem., Int. Ed.*, 2013, **52**, 3972.
- (S2) (a) T. Shen, Y. Yuan and N. Jiao, *Chem. Commun.*, 2014, **50**, 554; (b) Z. Gonda, F. Béke, O. Tishler, M. Petró, Z. Novák and B. Tóth, *Eur. J. Org. Chem.*, 2017, **2017**, 2112; (c) P. Kilaru, S. P. Acharya and P. Zhao, *Chem. Commun.*, 2018, **54**, 924.
- (S3) (a) X. Mu, T. Wu, H. Y. Wang, Y. L. Guo and G. Liu, *J. Am. Chem. Soc.*, 2012, **134**, 878; (b) H. Egami, R. Shimizu, M. Sodeoka, *J. Fluorine Chem.*, 2013, **152**, 51; (c) P. Xu, J. Xie, Q. Xue, C. Pan, Y. Cheng and C. Zhu, *Chem. - Eur. J.*, 2013, **19**, 14039; (d) J. Liu, S. Zhuang, Q. Gui, X. Chen, Z. Yang and Z. Tan, *Eur. J. Org. Chem.*, 2014, **2014**, 3196; (e) X.-J. Tang, C. S. Thomason and W. R. Dolbier, *Org. Lett.*, 2014, **16**, 4594; (f) W. Wei, J. Wen, D. Yang, X. Liu, M. Guo, R. Dong and H. Wang, *J. Org. Chem.*, 2014, **79**, 4225; (g) C. Liu, W. Zhao, Y. Huang, H. Wang and B. Zhang, *Tetrahedron*, 2015, **71**, 4344; (h) Z. Ruan, Z. Huang, Z. Xu, G. Mo, X. Tian, X.-Y. Yu and L. Ackermann, *Org. Lett.*, 2019, **21**, 1237; (i) J. Guo, C. Xu, L. Wang, W. Huang and M. Wang, *Org. Biomol. Chem.*, 2019, **17**, 4593.
- (S4) (a) W. P. Mai, J. T. Wang, L. R. Yang, J. W. Yuan, Y. M. Xiao, P. Mao and L. B. Qu, *Org. Lett.*, 2014, **16**, 204; (b) F. Gao, C. Yang, G.-L. Gao, L. Zheng and W. Xia, *Org. Lett.*, 2015, **17**, 3478; (c) Q. Wang, G. Han, Y. Liu and Q. Wang, *Adv. Synth. Catal.*, 2015, **357**, 2464.
- (S5) (a) L. Li, M. Deng, S.-C. Zheng, Y.-P. Xiong, B. Tan and X.-Y. Liu, *Org. Lett.*, 2014, **16**, 504; (b) X.-F. Xia, S.-L. Zhu, D. Wang and Y.-M. Liang, *Adv. Synth. Catal.*, 2017, **359**, 859.
